# Supplementary material for: MAFF inhibits angiogenesis in non-small cell lung cancer by suppressing YAP1 nuclear translocation
Source: PeerJ journal article supplement (doi:10.7717/peerj.20395), 2025-11-20
Supplement: Angiogenesis_Formation.zip [file Angiogenesis Formation-PZFX.xlsx]

## Sheet: Sheet1
H1299-NC	H1299-MAFF		A549-NC	A549-MAFF
34	20		40	25
31	20		38	37
30	21		50	33
21	16		34	41
21	18		40	26
24	18		42	30
33	17		41	26
26	21		47	28
28	23		45	36
Table Analyzed	H1299		Table Analyzed	A549
Column B	H1299-MAFF		Column B	A549-MAFF
vs.	vs.		vs.	vs.
Column A	H1299-NC		Column A	A549-NC
Unpaired t test			Unpaired t test
P value	0.0003		P value	0.0006
P value summary	***		P value summary	***
Significantly different (P < 0.05)?	Yes		Significantly different (P < 0.05)?	Yes
One- or two-tailed P value?	Two-tailed		One- or two-tailed P value?	Two-tailed
t, df	t=4.598, df=16		t, df	t=4.237, df=16
How big is the difference?			How big is the difference?
Mean of column A	27.56		Mean of column A	41.89
Mean of column B	19.33		Mean of column B	31.33
Difference between means (B - A) ± SEM	-8.222 ± 1.788		Difference between means (B - A) ± SEM	-10.56 ± 2.491
95% confidence interval	-12.01 to -4.431		95% confidence interval	-15.84 to -5.274
R squared (eta squared)	0.5692		R squared (eta squared)	0.5287
F test to compare variances			F test to compare variances
F, DFn, Dfd	4.756, 8, 8		F, DFn, Dfd	1.391, 8, 8
P value	0.0409		P value	0.6516
P value summary	*		P value summary	ns
Significantly different (P < 0.05)?	Yes		Significantly different (P < 0.05)?	No
Data analyzed			Data analyzed
Sample size, column A	9		Sample size, column A	9
Sample size, column B	9		Sample size, column B	9
