# Supplementary material for: MAFF inhibits angiogenesis in non-small cell lung cancer by suppressing YAP1 nuclear translocation
Source: PeerJ journal article supplement (doi:10.7717/peerj.20395), 2025-11-20
Supplement: CCK8.zip [file A549-CCK8.xlsx]

## Sheet: Sheet1
				BLANK			NC					MAFF						proliferation rate = （day X - blank）OD/（day 0 - blank）OD
				0.19	DAY 0	group1	0.325	0.415	0.422	0.387333	0.196333	0.363	0.375	0.429	0.389	0.198		1	1
				0.192		group2	0.301	0.336	0.419	0.352	0.161	0.332	0.421	0.447	0.4	0.209		1	1
				0.191		group3	0.375	0.371	0.338	0.361333	0.170333	0.332	0.449	0.438	0.406333	0.215333		1	1
				0.191	DAY 1	group1	0.634	0.641	0.715	0.663333	0.472333	0.528	0.479	0.514	0.507	0.316		2.40577	1.59596
						group2	0.604	0.553	0.637	0.598	0.407	0.498	0.502	0.569	0.523	0.332		2.52795	1.58852
						group3	0.61	0.598	0.642	0.616667	0.425667	0.553	0.52	0.532	0.535	0.344		2.49902	1.59752
					DAY2	group1	1.169	1.123	1.215	1.169	0.978	0.91	0.789	0.805	0.834667	0.643667		4.98132	3.25084
						group2	1.051	1.063	1.033	1.049	0.858	0.748	0.77	0.714	0.744	0.553		5.32919	2.64593
						group3	1.02	1.023	0.958	1.00033	0.809333	0.782	0.732	0.729	0.747667	0.556667		4.75147	2.58514
					DAY3	group1	1.885	1.563	1.725	1.72433	1.53333	1.246	0.981	0.89	1.039	0.848		7.80985	4.28283
						group2	1.842	1.697	1.346	1.62833	1.43733	1.056	1.024	0.961	1.01367	0.822667		8.92754	3.9362
						group3	1.875	1.459	2.153	1.829	1.638	1.073	0.996	0.862	0.977	0.786		9.61644	3.65015

## Sheet: Sheet2
					LV-201					LV-MAFF
		BLANK	DAY 0	组1	0.325	0.415	0.422	0.387333	0.196333	0.363	0.375	0.429	0.389	0.198
		0.19		组2	0.301	0.336	0.419	0.352	0.161	0.332	0.421	0.447	0.4	0.209
		0.192		组3	0.375	0.371	0.338	0.361333	0.170333	0.332	0.449	0.438	0.406333	0.215333
		0.191	DAY 1	组1	0.634	0.641	0.715	0.663333	0.472333	0.528	0.479	0.514	0.507	0.316
		0.191		组2	0.604	0.553	0.637	0.598	0.407	0.498	0.502	0.569	0.523	0.332
				组3	0.61	0.598	0.642	0.616667	0.425667	0.553	0.52	0.532	0.535	0.344
			DAY2	组1	1.169	1.123	1.215	1.169	0.978	0.91	0.789	0.805	0.834667	0.643667
				组2	1.051	1.063	1.033	1.049	0.858	0.748	0.77	0.714	0.744	0.553
				组3	1.02	1.023	0.958	1.00033	0.809333	0.782	0.732	0.729	0.747667	0.556667
			DAY3	组1	1.885	1.563	1.725	1.72433	1.53333	1.246	0.981	0.89	1.039	0.848
				组2	1.842	1.697	1.346	1.62833	1.43733	1.056	1.024	0.961	1.01367	0.822667
				组3	1.875	1.459	2.153	1.829	1.638	1.073	0.996	0.862	0.977	0.786
