# Supplementary material for: MAFF inhibits angiogenesis in non-small cell lung cancer by suppressing YAP1 nuclear translocation
Source: PeerJ journal article supplement (doi:10.7717/peerj.20395), 2025-11-20
Supplement: CCK8.zip [file CCK8-PZFX.xlsx]

## Sheet: A549
time(h)	A549-NC	A549-NC2	A549-NC3	A549-MAFF	A549-MAFF2	A549-MAFF3
0	1	1	1	1	1	1
24	2.40577	2.52795	2.49902	1.59596	1.58852	1.59752
48	4.98132	5.32919	4.75147	3.25084	2.64593	2.58514
72	7.80985	8.92754	9.61644	4.28283	3.9362	3.65015
Table Analyzed	A549
								Compare each cell mean with the other cell mean in that row
Two-way ANOVA	Ordinary
Alpha	0.05							Number of families	1
								Number of comparisons per family	4
Source of Variation	% of total variation	P value	P value summary	Significant?				Alpha	0.05
Interaction	13.66	<0.0001	****	Yes
Number of rows	68.69	<0.0001	****	Yes				Šídák's multiple comparisons test	Mean Diff.	95.00% CI of diff.	Below threshold?	Summary	Adjusted P Value
Number of columns	16.06	<0.0001	****	Yes
								A549-NC - A549-MAFF
ANOVA table	SS	DF	MS	F (DFn, DFd)				0	0	-0.8702 to 0.8702	No	ns	>0.9999
Interaction	19.92	3	6.64	F (3, 16) = 45.96				24	0.8836	0.01343 to 1.754	Yes	*	0.0458
Number of rows	100.2	3	33.4	F (3, 16) = 231.2				48	2.193	1.323 to 3.064	Yes	****	<0.0001
Number of columns	23.43	1	23.43	F (1, 16) = 162.2				72	4.828	3.958 to 5.698	Yes	****	<0.0001
Residual	2.312	16	0.1445
Difference between column means								Test details	Mean 1	Mean 2	Mean Diff.	SE of diff.	N1	N2	t	DF
Mean of A549-NC	4.321
Mean of A549-MAFF	2.344							A549-NC - A549-MAFF
Difference between means	1.976							0	1	1	0	0.3103	3	3	0	16
SE of difference	0.1552							24	2.478	1.594	0.8836	0.3103	3	3	2.847	16
95% CI of difference	1.647 to 2.305							48	5.021	2.827	2.193	0.3103	3	3	7.067	16
								72	8.785	3.956	4.828	0.3103	3	3	15.56	16
Data summary
Number of columns	2
Number of rows	4
Number of values	24

## Sheet: H1299
time(h)	H1299-NC	H1299-NC2	H1299-NC3	H1299-MAFF	H1299-MAFF2	H1299-MAFF3
0	1	1	1	1	1	1
24	2.03636	1.82857	1.99083	1.90506	1.49829	1.66769
48	2.46364	2.87937	3.6208	2.32911	2.59727	3.01231
72	4.44242	4.8381	6.27829	3.56013	3.86689	4.59692
Table Analyzed	H1299
								Compare each cell mean with the other cell mean in that row
Two-way ANOVA	Ordinary
Alpha	0.05							Number of families	1
								Number of comparisons per family	4
Source of Variation	% of total variation	P value	P value summary	Significant?				Alpha	0.05
Interaction	2.388	0.1877	ns	No
Number of rows	88.11	<0.0001	****	Yes				Šídák's multiple comparisons test	Mean Diff.	95.00% CI of diff.	Below threshold?	Summary	Adjusted P Value
Number of columns	2.429	0.0323	*	Yes
								H1299-NC - H1299-MAFF
ANOVA table	SS	DF	MS	F (DFn, DFd)				0	0	-1.065 to 1.065	No	ns	>0.9999
Interaction	1.17	3	0.39	F (3, 16) = 1.801				24	0.2616	-0.8039 to 1.327	No	ns	0.9381
Number of rows	43.17	3	14.39	F (3, 16) = 66.43				48	0.3417	-0.7238 to 1.407	No	ns	0.854
Number of columns	1.19	1	1.19	F (1, 16) = 5.495				72	1.178	0.1128 to 2.244	Yes	*	0.0272
Residual	3.466	16	0.2166
Difference between column means								Test details	Mean 1	Mean 2	Mean Diff.	SE of diff.	N1	N2	t	DF
Mean of H1299-NC	2.782
Mean of H1299-MAFF	2.336							H1299-NC - H1299-MAFF
Difference between means	0.4454							0	1	1	0	0.38	3	3	0	16
SE of difference	0.19							24	1.952	1.69	0.2616	0.38	3	3	0.6883	16
95% CI of difference	0.04259 to 0.8482							48	2.988	2.646	0.3417	0.38	3	3	0.8992	16
								72	5.186	4.008	1.178	0.38	3	3	3.101	16
Data summary
Number of columns	2
Number of rows	4
Number of values	24
