# Supplementary material for: MAFF inhibits angiogenesis in non-small cell lung cancer by suppressing YAP1 nuclear translocation
Source: PeerJ journal article supplement (doi:10.7717/peerj.20395), 2025-11-20
Supplement: CCK8.zip [file H1299-CCK8.xlsx]

## Sheet: Sheet1
	BLANK	0.203	0.204	0.205	0.204	group1
		0.211	0.209	0.218	0.212667	group2
		0.216	0.218	0.227	0.220333	group3
				NC					MAFF						proliferation rate = （day X - blank）OD/（day 0 - blank）OD
		DAY 0	group1	0.311	0.318	0.313	0.314	0.11	0.358	0.364	0.364	0.362	0.158		1	1
			group2	0.311	0.318	0.324	0.317667	0.105	0.308	0.308	0.315	0.310333	0.0976667		1	1
			group3	0.318	0.328	0.342	0.329333	0.109	0.326	0.326	0.334	0.328667	0.108333		1	1
		DAY 1	group1	0.409	0.444	0.431	0.428	0.224	0.493	0.505	0.517	0.505	0.301		2.03636	1.90506
			group2	0.424	0.42	0.37	0.404667	0.192	0.359	0.353	0.365	0.359	0.146333		1.82857	1.49829
			group3	0.45	0.447	0.415	0.437333	0.217	0.39	0.397	0.416	0.401	0.180667		1.99083	1.66769
		DAY2	group1	0.465	0.498	0.462	0.475	0.271	0.589	0.617	0.51	0.572	0.368		2.46364	2.32911
			group2	0.518	0.515	0.512	0.515	0.302333	0.473	0.451	0.475	0.466333	0.253667		2.87937	2.59727
			group3	0.627	0.619	0.599	0.615	0.394667	0.552	0.528	0.56	0.546667	0.326333		3.6208	3.01231
		DAY3	group1	0.702	0.711	0.665	0.692667	0.488667	0.751	0.782		0.7665	0.5625		4.44242	3.56013
			group2	0.731	0.636	0.795	0.720667	0.508	0.555	0.609	0.607	0.590333	0.377667		4.8381	3.86689
			group3	0.882	0.848	0.984	0.904667	0.684333	0.679	0.716	0.76	0.718333	0.498		6.27829	4.59692
