# Supplementary material for: MAFF inhibits angiogenesis in non-small cell lung cancer by suppressing YAP1 nuclear translocation
Source: PeerJ journal article supplement (doi:10.7717/peerj.20395), 2025-11-20
Supplement: Colony_Formation.zip [file Colony Formation-PZFZ.xlsx]

## Sheet: Sheet1
A549-NC	A549-MAFF					H1299-NC	H1299-MAFF
442	158					580	395
415	236					506	267
399	241					480	346
400	485					580	395
487	305					506	267
499	366					480	346
453	240					583	406
479	275					533	536
544	286					572	404
Table Analyzed	A549					Table Analyzed	H1299
Column B	A549-MAFF					Column B	H1299-MAFF
vs.	vs.					vs.	vs.
Column A	A549-NC					Column A	H1299-NC
Unpaired t test						Unpaired t test
P value	0.0002					P value	<0.0001
P value summary	***					P value summary	****
Significantly different (P < 0.05)?	Yes					Significantly different (P < 0.05)?	Yes
One- or two-tailed P value?	Two-tailed					One- or two-tailed P value?	Two-tailed
t, df	t=4.828, df=16					t, df	t=5.234, df=16
How big is the difference?						How big is the difference?
Mean of column A	457.6					Mean of column A	535.6
Mean of column B	288					Mean of column B	373.6
Difference between means (B - A) ± SEM	-169.6 ± 35.12					Difference between means (B - A) ± SEM	-162.0 ± 30.95
95% confidence interval	-244.0 to -95.11					95% confidence interval	-227.6 to -96.39
R squared (eta squared)	0.593					R squared (eta squared)	0.6313
F test to compare variances						F test to compare variances
F, DFn, Dfd	3.594, 8, 8					F, DFn, Dfd	3.462, 8, 8
P value	0.089					P value	0.0982
P value summary	ns					P value summary	ns
Significantly different (P < 0.05)?	No					Significantly different (P < 0.05)?	No
Data analyzed						Data analyzed
Sample size, column A	9					Sample size, column A	9
Sample size, column B	9					Sample size, column B	9
