# Supplementary material for: MAFF inhibits angiogenesis in non-small cell lung cancer by suppressing YAP1 nuclear translocation
Source: PeerJ journal article supplement (doi:10.7717/peerj.20395), 2025-11-20
Supplement: IF.zip [file IF-PZFX.xlsx]

## Sheet: Sheet1
A549-NC	A549-MAFF				H1299-NC	H1299-MAFF
1.11759	0.371772				0.666008	0.477813
0.749913	0.318966				0.631152	0.562411
0.623867	0.485694				0.63708	0.566029
0.906835	0.405923				0.585634	0.412691
0.828843	0.337694				0.707205	0.417282
0.692796	0.457311				0.589161	0.452898
0.817298	0.369832				0.600393	0.528804
0.830492	0.676818				0.578948	0.521464
0.712501	0.486777				0.569792	0.512472
Table Analyzed	A549				Table Analyzed	H1299
Column B	A549-MAFF				Column B	H1299-MAFF
vs.	vs.				vs.	vs.
Column A	A549-NC				Column A	H1299-NC
Unpaired t test					Unpaired t test
P value	<0.0001				P value	0.0001
P value summary	****				P value summary	***
Significantly different (P < 0.05)?	Yes				Significantly different (P < 0.05)?	Yes
One- or two-tailed P value?	Two-tailed				One- or two-tailed P value?	Two-tailed
t, df	t=6.200, df=16				t, df	t=5.036, df=16
How big is the difference?					How big is the difference?
Mean of column A	0.8089				Mean of column A	0.6184
Mean of column B	0.4345				Mean of column B	0.4947
Difference between means (B - A) ± SEM	-0.3744 ± 0.06039				Difference between means (B - A) ± SEM	-0.1237 ± 0.02457
95% confidence interval	-0.5024 to -0.2464				95% confidence interval	-0.1758 to -0.07164
R squared (eta squared)	0.7061				R squared (eta squared)	0.6132
F test to compare variances					F test to compare variances
F, DFn, Dfd	1.728, 8, 8				F, DFn, Dfd	1.581, 8, 8
P value	0.4561				P value	0.5317
P value summary	ns				P value summary	ns
Significantly different (P < 0.05)?	No				Significantly different (P < 0.05)?	No
Data analyzed					Data analyzed
Sample size, column A	9				Sample size, column A	9
Sample size, column B	9				Sample size, column B	9
