# Supplementary material for: MAFF inhibits angiogenesis in non-small cell lung cancer by suppressing YAP1 nuclear translocation
Source: PeerJ journal article supplement (doi:10.7717/peerj.20395), 2025-11-20
Supplement: IHC.zip [file Clinical Characteristics.xlsx]

## Sheet: Sheet1
MAFF	Gender	Age	Differentiation	T	Lymph node metastasis	Distant metastasis	MVD
Positive	Male	＜60	Moderate	Ⅰ	N0	NO	9.6
Positive	Male	≥60	Moderate	Ⅰ	N0	NO	7
Positive	Male	≥60	Moderate	Ⅰ	N0	NO	11.6
Negative	Male	≥60	Moderate	Ⅱ	N0	NO	12
Positive	FeMale	＜60	Moderate	Ⅰ	N0	NO	7.4
Positive	Male	≥60	LOW	Ⅰ	N0	NO	4
Positive	FeMale	＜60	Moderate	Ⅳ	YES	YES	4.2
Positive	FeMale	＜60	Moderate	Ⅳ	N0	YES	2.6
Negative	Male	＜60	Moderate	Ⅰ	N0	NO	7.6
Negative	Male	＜60	Moderate	Ⅲ	N0	NO	7
Negative	Male	≥60	Moderate	Ⅰ	N0	NO	11
Negative	Male	＜60	Moderate	Ⅱ	N0	NO	6.8
Negative	Male	＜60	Moderate	Ⅱ	YES	NO	11.2
Positive	FeMale	≥60	Moderate	Ⅰ	N0	NO	3.6
Negative	FeMale	＜60	Moderate	Ⅰ	N0	NO	6.6
Negative	FeMale	≥60	Moderate	Ⅰ	N0	NO	10.4
Negative	FeMale	＜60	Moderate	Ⅰ	N0	NO	6.4
Positive	FeMale	＜60	Moderate	Ⅳ	N0	YES	17.2
Negative	FeMale	≥60	Moderate	Ⅰ	N0	NO	7.8
Negative	Male	≥60	HIGH	Ⅰ	N0	NO	6.2
Negative	FeMale	＜60	Moderate	Ⅰ	N0	NO	6.2
Negative	Male	＜60	Moderate	Ⅰ	N0	NO	10.8
Negative	FeMale	＜60	Moderate	Ⅰ	N0	NO	9
Negative	Male	≥60	Moderate	Ⅱ	YES	NO	11.8
Positive	FeMale	≥60	Moderate	Ⅰ	N0	NO	7.8
Negative	FeMale	≥60	Moderate	Ⅱ	YES	NO	5.6
Negative	FeMale	≥60	Moderate	Ⅰ	N0	NO	10.6
Positive	Male	＜60	Moderate	Ⅰ	N0	NO	9.2
Negative	Male	≥60	LOW	Ⅲ	N0	NO	9.6
Negative	Male	＜60	LOW	Ⅱ	YES	NO	8
Negative	FeMale	≥60	Moderate	Ⅰ	N0	NO	6.4
Negative	Male	＜60	Moderate	Ⅲ	YES	NO	19.2
Positive	Male	＜60	Moderate	Ⅰ	N0	NO	7.6
Negative	FeMale	≥60	Moderate	Ⅲ	YES	NO	9.8
Negative	FeMale	＜60	Moderate	Ⅰ	N0	NO	10.2
Positive	FeMale	≥60	Moderate	Ⅰ	N0	NO	14
Negative	FeMale	＜60	Moderate	Ⅰ	N0	NO	7.8
Positive	FeMale	＜60	Moderate	Ⅱ	N0	NO	7
Positive	FeMale	≥60	Moderate	Ⅰ	N0	NO	8.8
Negative	Male	≥60	LOW	Ⅱ	YES	YES	7.6
Positive	Male	＜60	Moderate	Ⅰ	N0	NO	8
Negative	Male	＜60	Moderate	Ⅰ	YES	NO	7.6
Negative	FeMale	≥60	Moderate	Ⅰ	N0	NO	10.4
Positive	FeMale	＜60	Moderate	Ⅰ	N0	NO	7.8
Positive	FeMale	≥60	Moderate	Ⅰ	N0	NO	8.8
Negative	FeMale	≥60	Moderate	Ⅱ	YES	NO	10.4
Negative	FeMale	≥60	Moderate	Ⅲ	YES	NO	17.6
Negative	FeMale	＜60	LOW	Ⅲ	YES	NO	14.8
Negative	FeMale	≥60	Moderate	Ⅱ	N0	NO	7.8
Positive	Male	≥60	Moderate	Ⅳ	YES	YES	8.8
Negative	FeMale	＜60	Moderate	Ⅰ	N0	NO	7.2
Negative	Male	＜60	Moderate	Ⅰ	N0	NO	8.8
Positive	FeMale	＜60	Moderate	Ⅰ	N0	NO	14
Positive	Male	≥60	Moderate	Ⅱ	YES	NO	7.6
Positive	FeMale	＜60	Moderate	Ⅰ	N0	NO	5
Negative	Male	＜60	Moderate	Ⅰ	N0	NO	14.8
Negative	FeMale	＜60	Moderate	Ⅰ	N0	NO	11.6
Negative	FeMale	＜60	Moderate	Ⅰ	N0	NO	12.4
Negative	Male	≥60	Moderate	Ⅰ	N0	YES	8.6
Negative	FeMale	＜60	Moderate	Ⅰ	N0	NO	11.2
Negative	FeMale	≥60	Moderate	Ⅰ	N0	NO	10
Positive	FeMale	＜60	Moderate	Ⅰ	N0	NO	11.2
Negative	Male	＜60	Moderate	Ⅲ	YES	NO	12
Negative	FeMale	＜60	Moderate	Ⅰ	N0	NO	7.8
Positive	Male	≥60	Moderate	Ⅲ	N0	NO	15
Positive	FeMale	＜60	Moderate	Ⅰ	N0	NO	3
Positive	FeMale	≥60	Moderate	Ⅰ	N0	NO	5.8
Negative	FeMale	≥60	LOW	Ⅰ	N0	NO	14
Positive	FeMale	＜60	Moderate	Ⅰ	N0	NO	7.8
Negative	FeMale	＜60	Moderate	Ⅰ	N0	NO	12.2
Negative	FeMale	＜60	Moderate	Ⅰ	N0	NO	8.8
Negative	Male	＜60	LOW	Ⅰ	N0	NO	10
Positive	FeMale	＜60	Moderate	Ⅲ	YES	NO	16.4
Positive	FeMale	≥60	LOW	Ⅱ	N0	NO	5
Negative	Male	＜60	Moderate	Ⅱ	N0	NO	11.4
Positive	FeMale	＜60	Moderate	Ⅰ	N0	NO	8
Positive	Male	≥60	Moderate	Ⅱ	N0	NO	7.8
