# Supplementary material for: MAFF inhibits angiogenesis in non-small cell lung cancer by suppressing YAP1 nuclear translocation
Source: PeerJ journal article supplement (doi:10.7717/peerj.20395), 2025-11-20
Supplement: In_Vitro_Experiment.zip [file MVD-PZFX.xlsx]

## Sheet: Sheet1
A549-NC	A549-MAFF
9.8	4.6
8	3.8
9.6	3.4
8.4	3.2
Table Analyzed	MVD
Column B	A549-MAFF
vs.	vs.
Column A	A549-NC
Unpaired t test
P value	<0.0001
P value summary	****
Significantly different (P < 0.05)?	Yes
One- or two-tailed P value?	Two-tailed
t, df	t=9.629, df=6
How big is the difference?
Mean of column A	8.95
Mean of column B	3.75
Difference between means (B - A) ± SEM	-5.200 ± 0.5401
95% confidence interval	-6.521 to -3.879
R squared (eta squared)	0.9392
F test to compare variances
F, DFn, Dfd	2.043, 3, 3
P value	0.5722
P value summary	ns
Significantly different (P < 0.05)?	No
Data analyzed
Sample size, column A	4
Sample size, column B	4
