# Supplementary material for: MAFF inhibits angiogenesis in non-small cell lung cancer by suppressing YAP1 nuclear translocation
Source: PeerJ journal article supplement (doi:10.7717/peerj.20395), 2025-11-20
Supplement: In_Vitro_Experiment.zip [file The volume and weight-PZFX.xlsx]

## Sheet: V
DAY	A549-NC	A549-NC2	A549-NC3	A549-NC4	A549-MAFF	A549-MAFF2	A549-MAFF3	A549-MAFF4
0	0	0	0	0	0	0	0	0
2	32.67	25.73	24.5	22.58	26.36	23.52	20.48	17.78
4	40.39	29.81	27.22	24.7	32.93	24.28	21.5	18.26
6	45.2	37.89	44.1	43.35	44.71	29.8	25.09	20.99
8	45.65	73	53.24	43.35	46.66	38.79	29.66	25.11
10	84.04	96.8	63.89	130.14	83.03	61.06	41.88	43.56
12	252.47	184.56	151.38	51.71	95.18	85	75.63	62.92
14	304	193.49	196.47	269	138.51	135.82	98.78	94.22
16	377.26	325.14	235.67	237.65	221.04	182.65	152.8	137.68
Table Analyzed	Volume								Compare each cell mean with the other cell mean in that row
Two-way ANOVA	Ordinary								Number of families	1
Alpha	0.05								Number of comparisons per family	9
									Alpha	0.05
Source of Variation	% of total variation	P value	P value summary	Significant?
Interaction	7.531	0.0001	***	Yes					Šídák's multiple comparisons test	Mean Diff.	95.00% CI of diff.	Below threshold?	Summary	Adjusted P Value
行的因素	75.33	<0.0001	****	Yes
列因素	6.737	<0.0001	****	Yes					A549-NC - A549-MAFF
									Row 1	0	-65.40 to 65.40	No	ns	>0.9999
ANOVA table	SS	DF	MS	F (DFn, DFd)	P value				Row 2	4.335	-61.07 to 69.74	No	ns	>0.9999
Interaction	40314	8	5039	F (8, 54) = 4.888	P=0.0001				Row 3	6.288	-59.11 to 71.69	No	ns	>0.9999
Number of rows	403234	8	50404	F (8, 54) = 48.89	P<0.0001				Row 4	12.49	-52.91 to 77.89	No	ns	0.9996
Number of columns	36063	1	36063	F (1, 54) = 34.98	P<0.0001				Row 5	18.76	-46.65 to 84.16	No	ns	0.9917
Residual	55674	54	1031						Row 6	36.34	-29.07 to 101.7	No	ns	0.6682
									Row 7	80.35	14.95 to 145.7	Yes	**	0.0075
Difference between column means									Row 8	123.9	58.51 to 189.3	Yes	****	<0.0001
Mean of A549-NC	104.6								Row 9	120.4	54.99 to 185.8	Yes	****	<0.0001
Mean of A549-MAFF	59.88
Difference between means	44.76
SE of difference	7.568								Test details	Mean 1	Mean 2	Mean Diff.	SE of diff.	N1	N2	t	DF
95% CI of difference	29.59 to 59.93
									A549-NC - A549-MAFF
Data summary									Row 1	0	0	0	22.7	4	4	0	54
Number of columns	2								Row 2	26.37	22.04	4.335	22.7	4	4	0.1909	54
Number of rows	9								Row 3	30.53	24.24	6.288	22.7	4	4	0.2769	54
Number of values	72								Row 4	42.64	30.15	12.49	22.7	4	4	0.55	54
									Row 5	53.81	35.06	18.76	22.7	4	4	0.826	54
									Row 6	93.72	57.38	36.34	22.7	4	4	1.6	54
									Row 7	160	79.68	80.35	22.7	4	4	3.539	54
									Row 8	240.7	116.8	123.9	22.7	4	4	5.457	54
									Row 9	293.9	173.5	120.4	22.7	4	4	5.302	54

## Sheet: W
A549-NC	A549-MAFF
140	100
160	90
170	90
160	110
Table Analyzed	Weight
Column B	A549-MAFF
vs.	vs.
Column A	A549-NC
Unpaired t test
P value	0.0003
P value summary	***
Significantly different (P < 0.05)?	Yes
One- or two-tailed P value?	Two-tailed
t, df	t=7.589, df=6
How big is the difference?
Mean of column A	157.5
Mean of column B	97.5
Difference between means (B - A) ± SEM	-60.00 ± 7.906
95% confidence interval	-79.34 to -40.66
R squared (eta squared)	0.9057
F test to compare variances
F, DFn, Dfd	1.727, 3, 3
P value	0.6645
P value summary	ns
Significantly different (P < 0.05)?	No
Data analyzed
Sample size, column A	4
Sample size, column B	4
