# Supplementary material for: MAFF inhibits angiogenesis in non-small cell lung cancer by suppressing YAP1 nuclear translocation
Source: PeerJ journal article supplement (doi:10.7717/peerj.20395), 2025-11-20
Supplement: In_Vitro_Experiment.zip [file Vitro WB-PZFX.xlsx]

## Sheet: MAFF
A549-NC	A549-MAFF
0.256123	1.88108
0.621595	1.61587
1.01852	1.76852
0.762081	0.802856
0.09919	1.73059
0.320533	1.46202
0.354041	1.42492
0.233984	0.897815
0.310341	1.06785
0.608177	1.08509
0.528932	1.75962
0.810217	1.2841
Table Analyzed	MAFF
Column B	A549-MAFF
vs.	vs.
Column A	A549-NC
Unpaired t test
P value	<0.0001
P value summary	****
Significantly different (P < 0.05)?	Yes
One- or two-tailed P value?	Two-tailed
t, df	t=6.810, df=22
How big is the difference?
Mean of column A	0.4936
Mean of column B	1.398
Difference between means (B - A) ± SEM	0.9047 ± 0.1328
95% confidence interval	0.6292 to 1.180
R squared (eta squared)	0.6783
F test to compare variances
F, DFn, Dfd	1.770, 11, 11
P value	0.3578
P value summary	ns
Significantly different (P < 0.05)?	No
Data analyzed
Sample size, column A	12
Sample size, column B	12

## Sheet: YAP1
A549-NC	A549-MAFF
0.799513	0.739574
1.29255	0.606128
2.90656	1.01726
2.00396	0.708811
1.17363	1.22379
1.24315	1.0759
1.5854	1.22027
1.42655	1.23082
1.55268	1.01168
1.46436	0.727439
2.2881	1.48473
2.33017	0.786877
Table Analyzed	YAP1
Column B	A549-MAFF
vs.	vs.
Column A	A549-NC
Unpaired t test
P value	0.0015
P value summary	**
Significantly different (P < 0.05)?	Yes
One- or two-tailed P value?	Two-tailed
t, df	t=3.625, df=22
How big is the difference?
Mean of column A	1.672
Mean of column B	0.9861
Difference between means (B - A) ± SEM	-0.6861 ± 0.1893
95% confidence interval	-1.079 to -0.2936
R squared (eta squared)	0.374
F test to compare variances
F, DFn, Dfd	4.778, 11, 11
P value	0.0153
P value summary	*
Significantly different (P < 0.05)?	Yes
Data analyzed
Sample size, column A	12
Sample size, column B	12

## Sheet: CTGF
A549-NC	A549-MAFF
0.800816	0.791656
1.061	0.882382
1.72276	1.19239
1.89662	1.13257
0.622126	0.813255
0.949839	0.725955
0.980439	0.871324
1.01817	0.801423
1.0229	1.01802
1.52283	0.939972
1.77631	1.33249
2.08155	1.11329
Table Analyzed	CTGF
Column B	A549-MAFF
vs.	vs.
Column A	A549-NC
Unpaired t test
P value	0.0439
P value summary	*
Significantly different (P < 0.05)?	Yes
One- or two-tailed P value?	Two-tailed
t, df	t=2.137, df=22
How big is the difference?
Mean of column A	1.288
Mean of column B	0.9679
Difference between means (B - A) ± SEM	-0.3201 ± 0.1497
95% confidence interval	-0.6306 to -0.009507
R squared (eta squared)	0.1719
F test to compare variances
F, DFn, Dfd	6.536, 11, 11
P value	0.0042
P value summary	**
Significantly different (P < 0.05)?	Yes
Data analyzed
Sample size, column A	12
Sample size, column B	12

## Sheet: VEFA
A549-NC	A549-MAFF
0.46708	0.710853
0.957266	0.582857
1.3232	0.780063
1.63141	0.352014
0.524095	0.866198
0.64629	0.616189
0.700195	0.695534
0.81987	0.395219
0.768722	0.660397
1.1279	0.700268
1.14134	0.932809
1.11603	1.02818
Table Analyzed	VEGFA
Column B	A549-MAFF
vs.	vs.
Column A	A549-NC
Unpaired t test
P value	0.0472
P value summary	*
Significantly different (P < 0.05)?	Yes
One- or two-tailed P value?	Two-tailed
t, df	t=2.102, df=22
How big is the difference?
Mean of column A	0.9353
Mean of column B	0.6934
Difference between means (B - A) ± SEM	-0.2419 ± 0.1151
95% confidence interval	-0.4805 to -0.003264
R squared (eta squared)	0.1673
F test to compare variances
F, DFn, Dfd	3.047, 11, 11
P value	0.0778
P value summary	ns
Significantly different (P < 0.05)?	No
Data analyzed
Sample size, column A	12
Sample size, column B	12
