# Supplementary material for: MAFF inhibits angiogenesis in non-small cell lung cancer by suppressing YAP1 nuclear translocation
Source: PeerJ journal article supplement (doi:10.7717/peerj.20395), 2025-11-20
Supplement: Transwell.zip [file Transwell-PZFX.xlsx]

## Sheet: Sheet1
A549-NC	A549-MAFF				H1299-NC	H1299-MAFF
228	59				121	69
227	56				98	67
225	50				98	60
212	35				92	54
187	34				89	53
138	31				84	51
91	31				80	51
90	28				69	45
86	27				82	36
80	23				73	32
77	17				71	28
75	16				64	19
Table Analyzed	A549				Table Analyzed	H1299
Column B	A549-MAFF				Column B	H1299-MAFF
vs.	vs.				vs.	vs.
Column A	A549-NC				Column A	H1299-NC
Unpaired t test					Unpaired t test
P value	<0.0001				P value	<0.0001
P value summary	****				P value summary	****
Significantly different (P < 0.05)?	Yes				Significantly different (P < 0.05)?	Yes
One- or two-tailed P value?	Two-tailed				One- or two-tailed P value?	Two-tailed
t, df	t=5.515, df=22				t, df	t=5.922, df=22
How big is the difference?					How big is the difference?
Mean of column A	143				Mean of column A	85.08
Mean of column B	33.92				Mean of column B	47.08
Difference between means (B - A) ± SEM	-109.1 ± 19.78				Difference between means (B - A) ± SEM	-38.00 ± 6.417
95% confidence interval	-150.1 to -68.06				95% confidence interval	-51.31 to -24.69
R squared (eta squared)	0.5803				R squared (eta squared)	0.6145
F test to compare variances					F test to compare variances
F, DFn, Dfd	22.44, 11, 11				F, DFn, Dfd	1.040, 11, 11
P value	<0.0001				P value	0.9496
P value summary	****				P value summary	ns
Significantly different (P < 0.05)?	Yes				Significantly different (P < 0.05)?	No
Data analyzed					Data analyzed
Sample size, column A	12				Sample size, column A	12
Sample size, column B	12				Sample size, column B	12
