# Supplementary material for: MAFF inhibits angiogenesis in non-small cell lung cancer by suppressing YAP1 nuclear translocation
Source: PeerJ journal article supplement (doi:10.7717/peerj.20395), 2025-11-20
Supplement: Tumors_in_Animal_Models.pdf [file Tumors_in_Animal_Models.pdf]

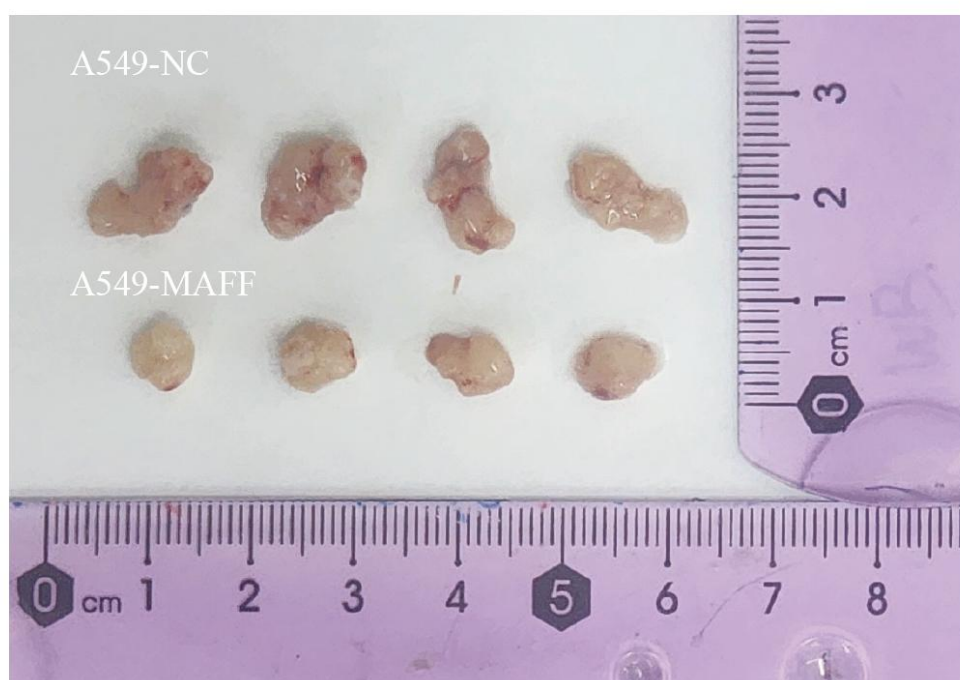

The tumor was excised after euthanasia, as shown in Figure 9-A, The diameters were all less than 2 cm.

The final tumor volume measurement before euthanasia:

|        | Length (mm) | Width (mm) |
|--------|-------------|------------|
| NC-1   | 11.5        | 8.1        |
| NC-2   | 12.9        | 7.1        |
| NC-3   | 10.5        | 6.7        |
| NC-4   | 9.7         | 7          |
|        |             |            |
| MAFF-1 | 7.9         | 6.8        |
| MAFF-2 | 7.7         | 6.3        |
| MAFF-3 | 7.4         | 6.1        |
| MAFF-4 | 6.7         | 5.6        |
