# Supplementary material for: MAFF inhibits angiogenesis in non-small cell lung cancer by suppressing YAP1 nuclear translocation
Source: PeerJ journal article supplement (doi:10.7717/peerj.20395), 2025-11-20
Supplement: WB.zip [file A549-PZFX.xlsx]

## Sheet: MAFF
A549-NC	A549-MAFF
0.0819471	1.79907
0.10359	1.97581
0.09644	1.7045
0.107667	1.69277
0.131876	1.79064
0.128117	1.63813
0.0824576	1.23071
0.0974455	1.2338
0.0760633	1.24752
0.119948	2.21436
0.158933	1.68095
0.12315	1.8081
Table Analyzed	MAFF
Column B	A549-MAFF
vs.	vs.
Column A	A549-NC
Unpaired t test
P value	<0.0001
P value summary	****
Significantly different (P < 0.05)?	Yes
One- or two-tailed P value?	Two-tailed
t, df	t=17.81, df=22
How big is the difference?
Mean of column A	0.109
Mean of column B	1.668
Difference between means (B - A) ± SEM	1.559 ± 0.08753
95% confidence interval	1.378 to 1.741
R squared (eta squared)	0.9352
F test to compare variances
F, DFn, Dfd	153.5, 11, 11
P value	<0.0001
P value summary	****
Significantly different (P < 0.05)?	Yes
Data analyzed
Sample size, column A	12
Sample size, column B	12

## Sheet: YAP1
A549-NC	A549-MAFF
1.53057	1.38975
2.21023	1.58873
2.32961	1.20286
1.51068	1.14284
1.47424	1.20202
1.58751	1.18672
0.954599	0.819705
1.17817	0.760369
0.997594	0.64558
Table Analyzed	YAP1
Column B	A549-MAFF
vs.	vs.
Column A	A549-NC
Unpaired t test
P value	0.0395
P value summary	*
Significantly different (P < 0.05)?	Yes
One- or two-tailed P value?	Two-tailed
t, df	t=2.242, df=16
How big is the difference?
Mean of column A	1.53
Mean of column B	1.104
Difference between means (B - A) ± SEM	-0.4261 ± 0.1901
95% confidence interval	-0.8290 to -0.02318
R squared (eta squared)	0.239
F test to compare variances
F, DFn, Dfd	2.452, 8, 8
P value	0.2262
P value summary	ns
Significantly different (P < 0.05)?	No
Data analyzed
Sample size, column A	9
Sample size, column B	9

## Sheet: CTGF
A549-NC	A549-MAFF
1.48711	1.45328
1.7747	1.63131
1.65019	1.38298
1.33622	0.994417
1.28593	1.20119
1.72205	1.33386
1.29893	1.26796
1.4926	1.11484
1.21832	0.843736
Table Analyzed	CTGF
Column B	A549-MAFF
vs.	vs.
Column A	A549-NC
Unpaired t test
P value	0.0465
P value summary	*
Significantly different (P < 0.05)?	Yes
One- or two-tailed P value?	Two-tailed
t, df	t=2.158, df=16
How big is the difference?
Mean of column A	1.474
Mean of column B	1.247
Difference between means (B - A) ± SEM	-0.2269 ± 0.1052
95% confidence interval	-0.4499 to -0.003963
R squared (eta squared)	0.2254
F test to compare variances
F, DFn, Dfd	1.386, 8, 8
P value	0.6554
P value summary	ns
Significantly different (P < 0.05)?	No
Data analyzed
Sample size, column A	9
Sample size, column B	9

## Sheet: Sheet1
A549-NC	A549-MAFF
0.85283	0.68297
0.862449	0.758325
0.777352	0.694552
1.02642	0.739073
0.845034	0.948503
0.971153	0.810971
0.935593	0.851454
0.928117	0.871294
0.856381	0.803441
Table Analyzed	VEGFA
Column B	A549-MAFF
vs.	vs.
Column A	A549-NC
Unpaired t test
P value	0.0199
P value summary	*
Significantly different (P < 0.05)?	Yes
One- or two-tailed P value?	Two-tailed
t, df	t=2.585, df=16
How big is the difference?
Mean of column A	0.895
Mean of column B	0.7956
Difference between means (B - A) ± SEM	-0.09942 ± 0.03846
95% confidence interval	-0.1809 to -0.01789
R squared (eta squared)	0.2946
F test to compare variances
F, DFn, Dfd	1.291, 8, 8
P value	0.7266
P value summary	ns
Significantly different (P < 0.05)?	No
Data analyzed
Sample size, column A	9
Sample size, column B	9
