# Supplementary material for: MAFF inhibits angiogenesis in non-small cell lung cancer by suppressing YAP1 nuclear translocation
Source: PeerJ journal article supplement (doi:10.7717/peerj.20395), 2025-11-20
Supplement: WB.zip [file H1299-PZFX.xlsx]

## Sheet: MAFF
H1299-NC	H1299-MAFF
0.22008	2.64639
0.307184	4.40466
0.147612	3.35625
0.387505	3.32335
0.934929	2.69558
0.472819	2.61936
0.371654	1.69647
0.421108	1.74523
0.381906	2.77305
Table Analyzed	MAFF/β-actin
Column B	H1299-MAFF
vs.	vs.
Column A	H1299-NC
Unpaired t test
P value	<0.0001
P value summary	****
Significantly different (P < 0.05)?	Yes
One- or two-tailed P value?	Two-tailed
t, df	t=8.352, df=16
How big is the difference?
Mean of column A	0.405
Mean of column B	2.807
Difference between means (B - A) ± SEM	2.402 ± 0.2876
95% confidence interval	1.792 to 3.011
R squared (eta squared)	0.8134
F test to compare variances
F, DFn, Dfd	13.97, 8, 8
P value	0.0012
P value summary	**
Significantly different (P < 0.05)?	Yes
Data analyzed
Sample size, column A	9
Sample size, column B	9

## Sheet: YAP1
H1299-NC	H1299-MAFF
1.71422	1.38566
2.47237	1.92203
1.57326	1.16524
1.74974	0.97151
2.41688	1.10158
1.90812	0.73231
0.852419	0.533088
0.999438	0.565486
0.850221	1.11795
Table Analyzed	YAP1/β-actin
Column B	H1299-MAFF
vs.	vs.
Column A	H1299-NC
Unpaired t test
P value	0.0404
P value summary	*
Significantly different (P < 0.05)?	Yes
One- or two-tailed P value?	Two-tailed
t, df	t=2.231, df=16
How big is the difference?
Mean of column A	1.615
Mean of column B	1.055
Difference between means (B - A) ± SEM	-0.5602 ± 0.2512
95% confidence interval	-1.093 to -0.02778
R squared (eta squared)	0.2372
F test to compare variances
F, DFn, Dfd	2.023, 8, 8
P value	0.3389
P value summary	ns
Significantly different (P < 0.05)?	No
Data analyzed
Sample size, column A	9
Sample size, column B	9

## Sheet: CTGF
H1299-NC	H1299-MAFF
0.912347	0.564123
1.69412	1.1868
1.21162	1.09724
1.10197	0.802807
1.15899	0.783239
1.07563	0.228904
0.775297	0.377222
0.625204	0.277531
0.582634	0.31091
Table Analyzed	CTGF/β-actin
Column B	H1299-MAFF
vs.	vs.
Column A	H1299-NC
Unpaired t test
P value	0.0317
P value summary	*
Significantly different (P < 0.05)?	Yes
One- or two-tailed P value?	Two-tailed
t, df	t=2.354, df=16
How big is the difference?
Mean of column A	1.015
Mean of column B	0.6254
Difference between means (B - A) ± SEM	-0.3899 ± 0.1656
95% confidence interval	-0.7410 to -0.03876
R squared (eta squared)	0.2572
F test to compare variances
F, DFn, Dfd	1.104, 8, 8
P value	0.8918
P value summary	ns
Significantly different (P < 0.05)?	No
Data analyzed
Sample size, column A	9
Sample size, column B	9

## Sheet: VEGFA
H1299-NC	H1299-MAFF
1.06515	0.8971
1.24874	1.01946
0.923837	0.764211
1.13795	0.704001
0.762499	0.594379
0.722202	0.521353
0.996389	0.69861
0.705086	0.643593
0.686213	0.441796
Table Analyzed	VEGFA/β-actin
Column B	H1299-MAFF
vs.	vs.
Column A	H1299-NC
Unpaired t test
P value	0.0301
P value summary	*
Significantly different (P < 0.05)?	Yes
One- or two-tailed P value?	Two-tailed
t, df	t=2.380, df=16
How big is the difference?
Mean of column A	0.9165
Mean of column B	0.6983
Difference between means (B - A) ± SEM	-0.2182 ± 0.09167
95% confidence interval	-0.4125 to -0.02383
R squared (eta squared)	0.2614
F test to compare variances
F, DFn, Dfd	1.346, 8, 8
P value	0.6844
P value summary	ns
Significantly different (P < 0.05)?	No
Data analyzed
Sample size, column A	9
Sample size, column B	9
