# Supplementary material for: MAFF inhibits angiogenesis in non-small cell lung cancer by suppressing YAP1 nuclear translocation
Source: PeerJ journal article supplement (doi:10.7717/peerj.20395), 2025-11-20
Supplement: WB.zip [file MAFF-PZFX.xlsx]

## Sheet: Sheet1
BEAS-2B	A549	H1299
1.6558	0.0710951	0.484604
1.33819	0.057843	0.624608
1.37793	0.0559139	0.466853
1.83407	0.325804	1.13921
1.7157	0.245413	1.12144
1.52828	0.244119	1.0058
1.67729	0.721641	1.04275
1.58302	1.01814	1.1497
1.36019	0.548708	1.54033
Table Analyzed	Data 1
Data sets analyzed	A-C									Number of families	1
										Number of comparisons per family	2
ANOVA summary										Alpha	0.05
F	35.86
P value	<0.0001									Dunnett's multiple comparisons test	Mean Diff.	95.00% CI of diff.	Below threshold?	Summary	Adjusted P Value	A-?
P value summary	****									BEAS-2B vs. A549	1.198	0.8656 to 1.530	Yes	****	<0.0001	B	A549
Significant diff. among means (P < 0.05)?	Yes									BEAS-2B vs. H1299	0.6106	0.2782 to 0.9430	Yes	***	0.0005	C	H1299
R squared	0.7493
										Test details	Mean 1	Mean 2	Mean Diff.	SE of diff.	n1	n2	q	DF
Brown-Forsythe test										BEAS-2B vs. A549	1.563	0.3654	1.198	0.1415	9	9	8.468	24
F (DFn, DFd)	0.8814 (2, 24)									BEAS-2B vs. H1299	1.563	0.9528	0.6106	0.1415	9	9	4.316	24
P value	0.4272
P value summary	ns
Are SDs significantly different (P < 0.05)?	No
Bartlett's test
Bartlett's statistic (corrected)	3.863
P value	0.1449
P value summary	ns
Are SDs significantly different (P < 0.05)?	No
ANOVA table	SS	DF	MS	F (DFn, DFd)	P value
Treatment (between columns)	6.459	2	3.229	F (2, 24) = 35.86	P<0.0001
Residual (within columns)	2.161	24	0.09006
Total	8.62	26
Data summary
Number of treatments (columns)	3
Number of values (total)	27
