# Supplementary figures and images for: MAFF inhibits angiogenesis in non-small cell lung cancer by suppressing YAP1 nuclear translocation
Source: PeerJ journal article supplement (doi:10.7717/peerj.20395), 2025-11-20

Repeat 1 A549-NC


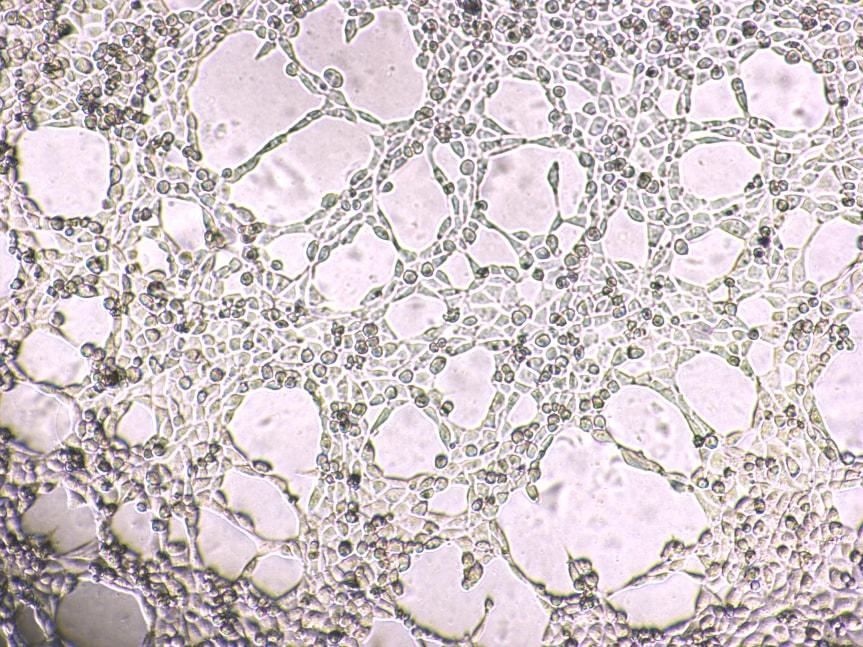

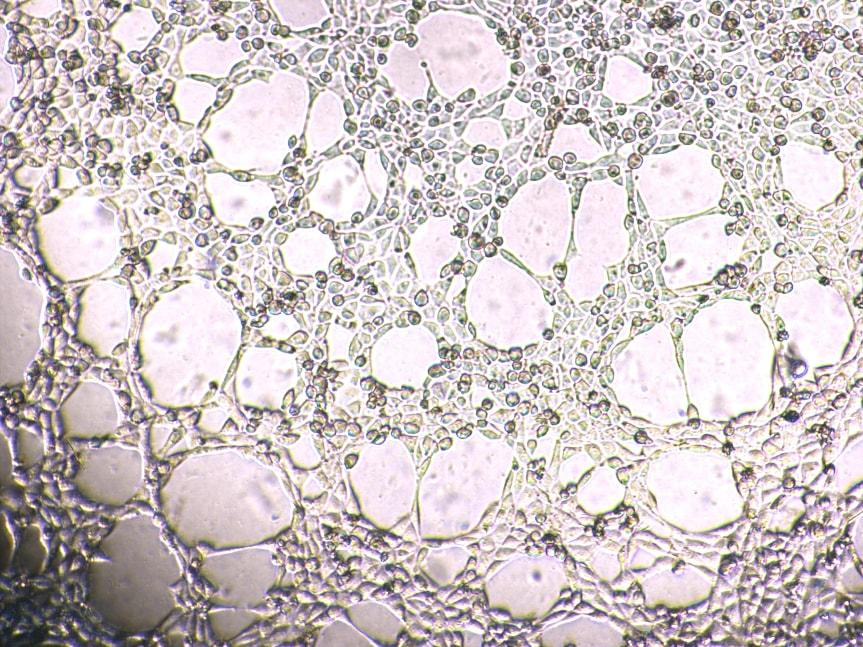

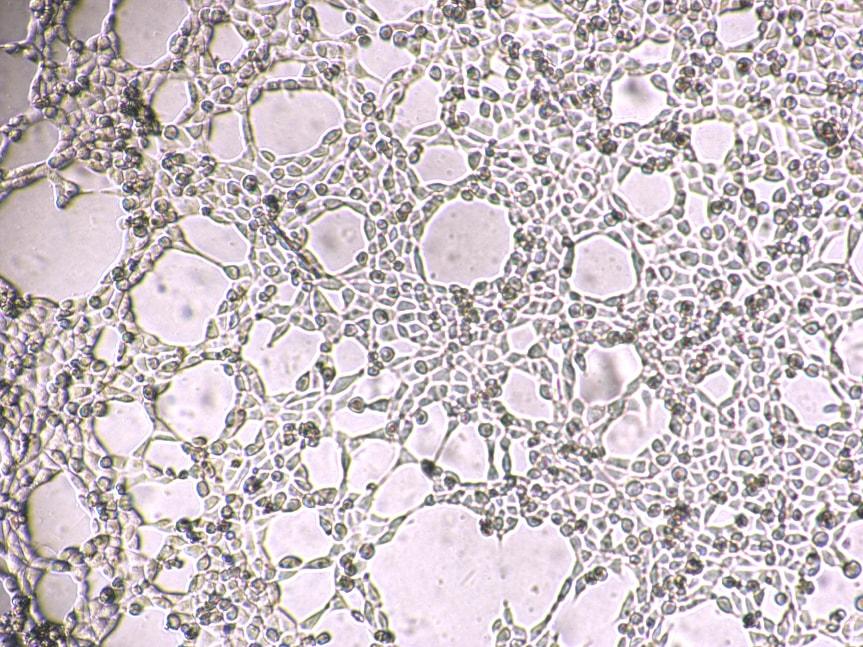


Repeat 1 A549-MAFF


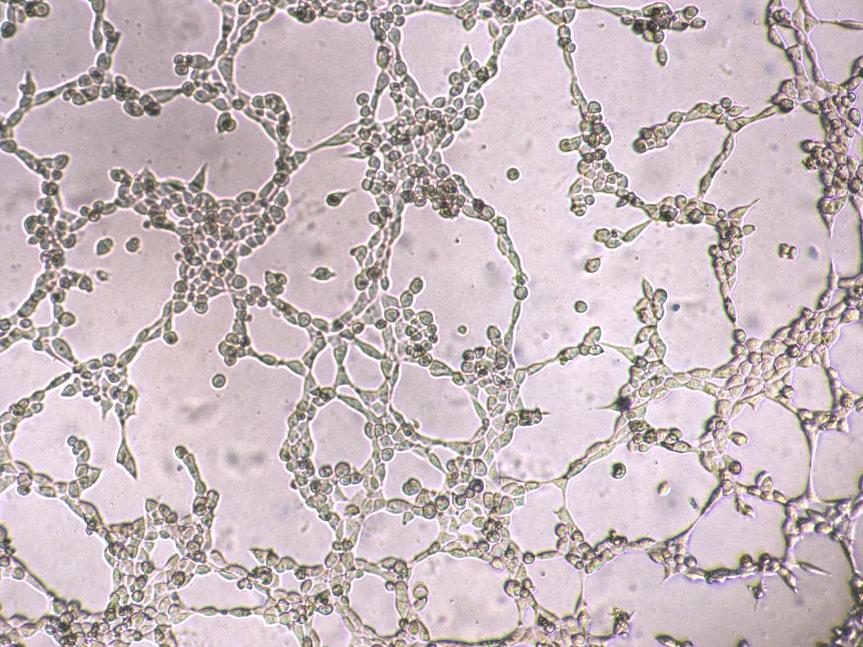

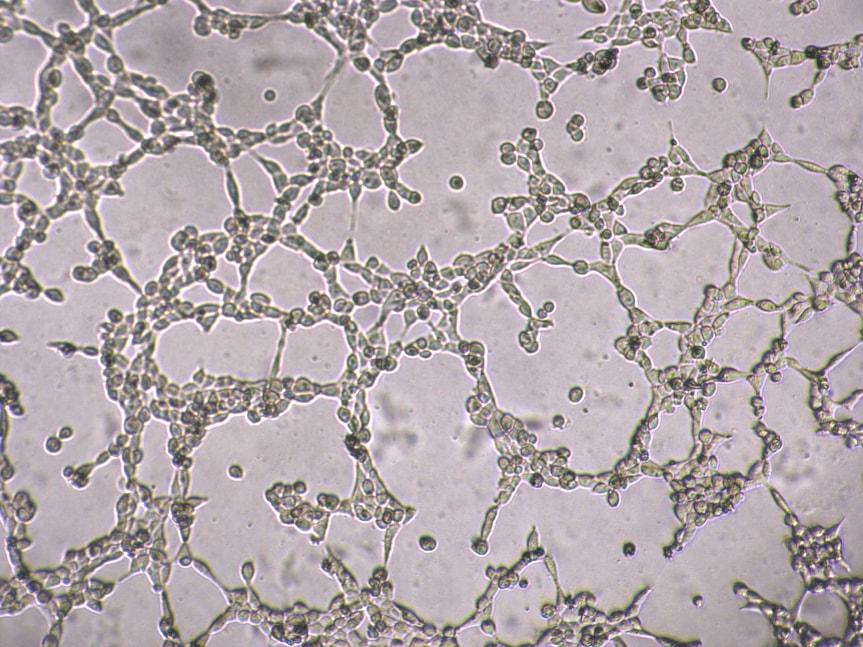

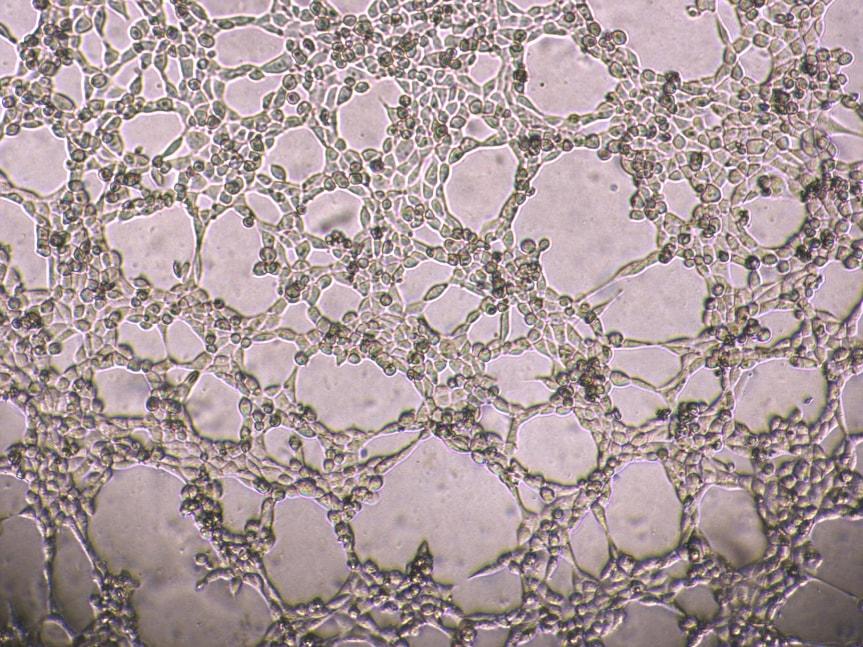


Repeat 2 A549-NC


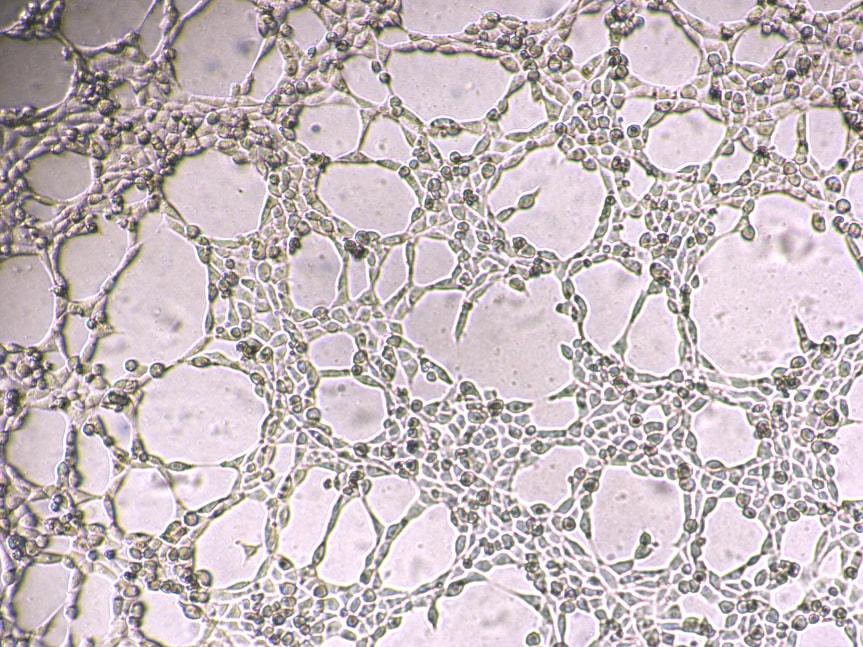

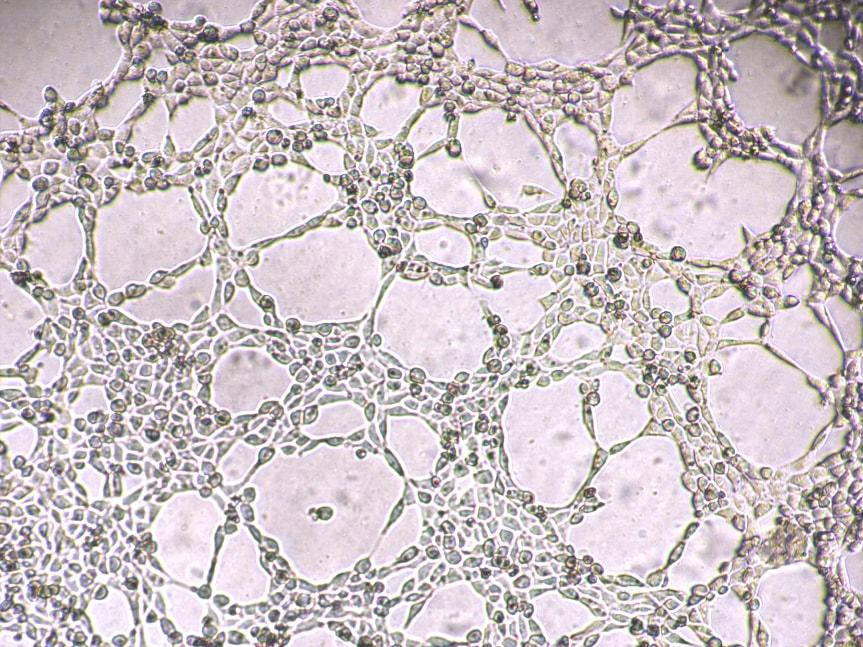

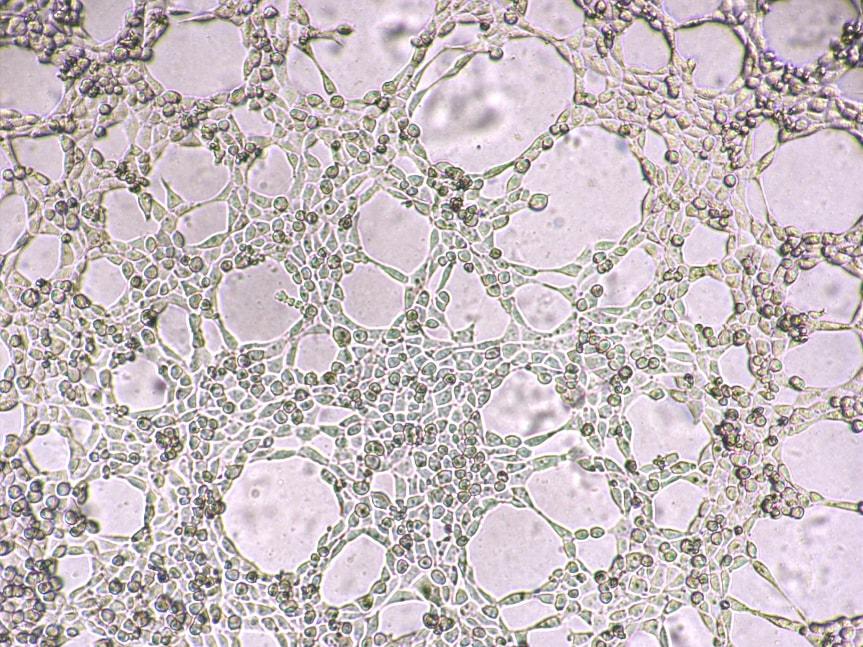


Repeat 2 A549-MAFF


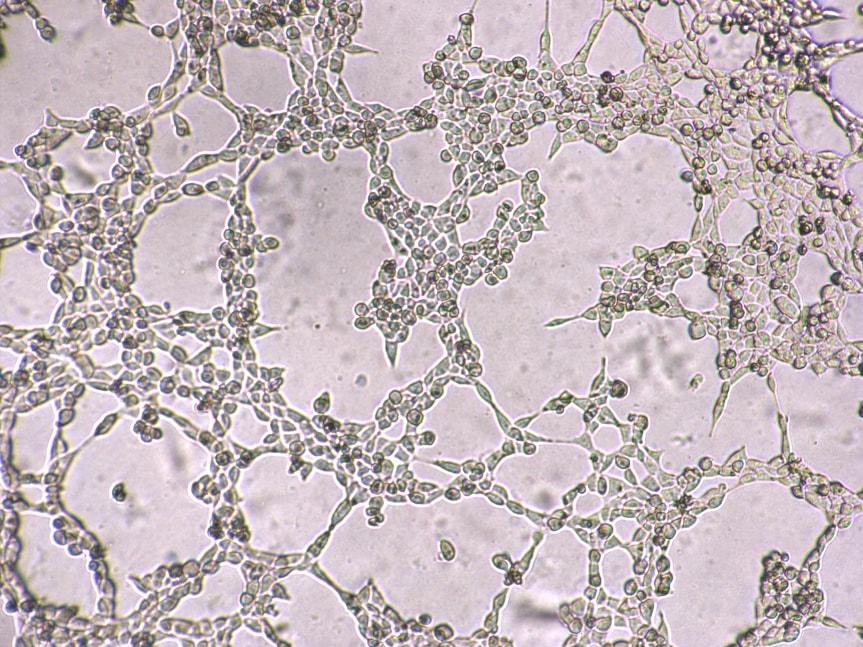

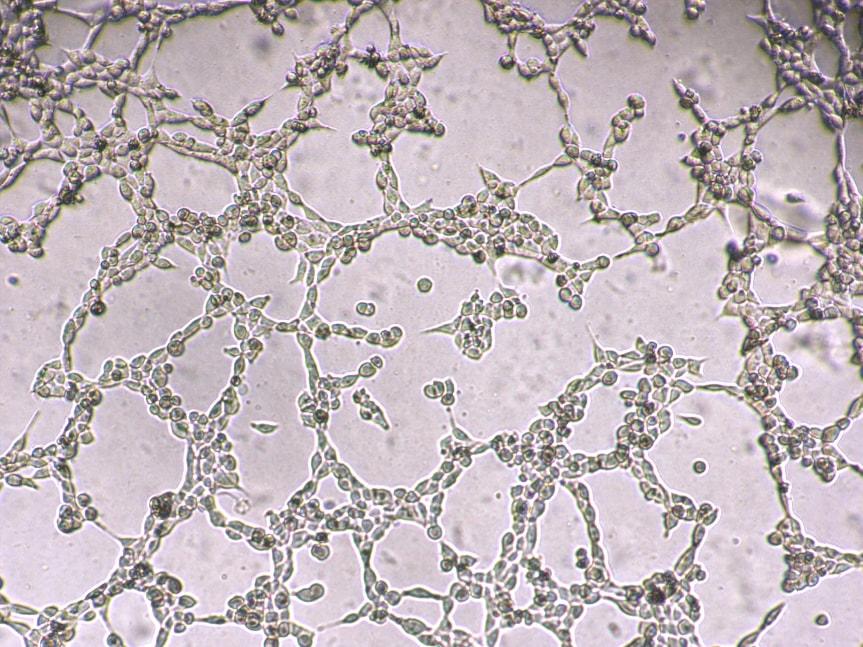

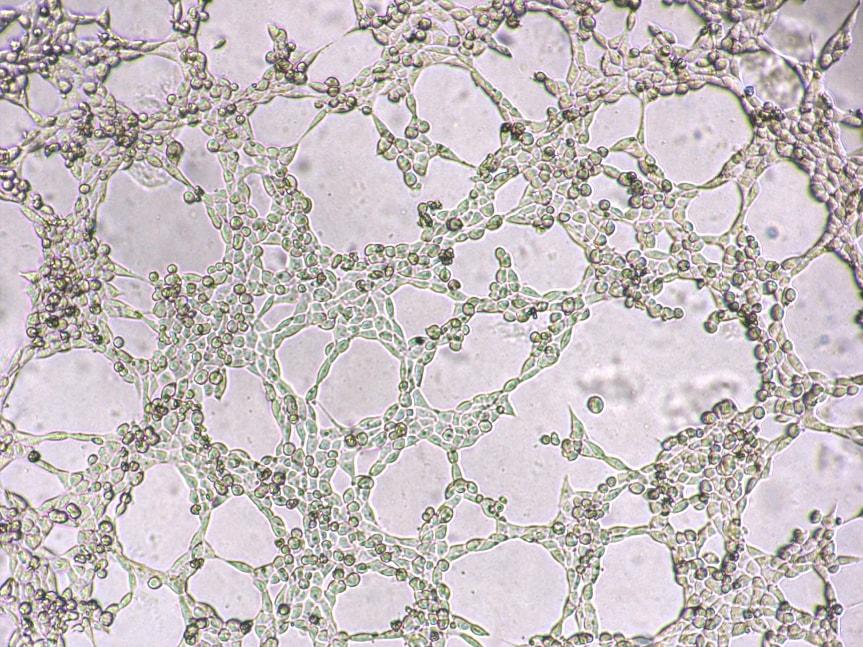


Repeat 3 A549-NC


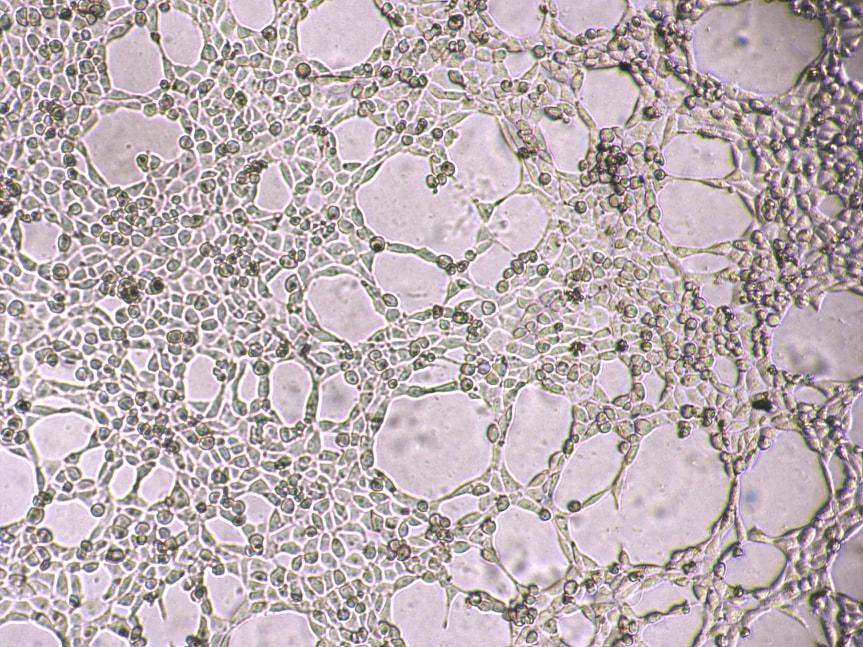

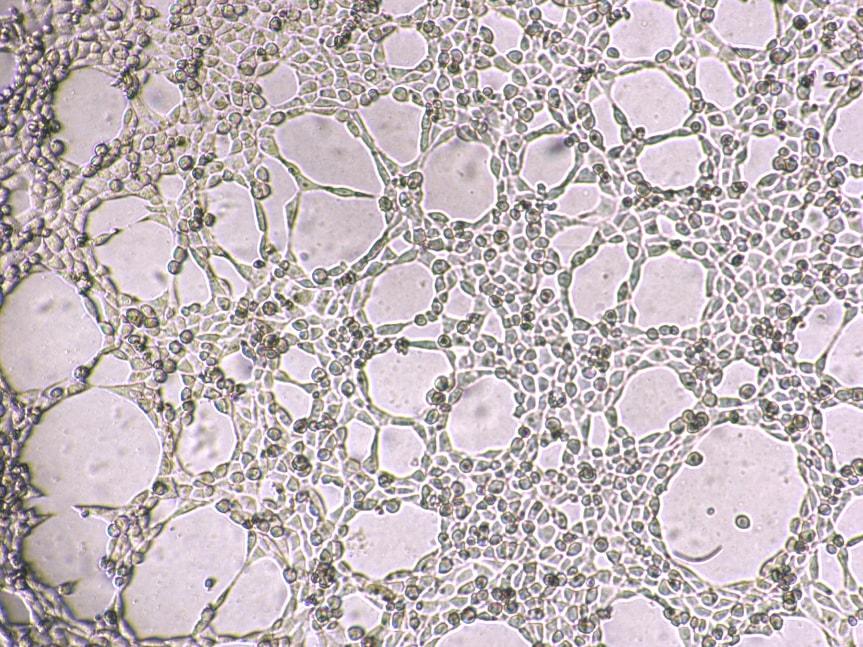

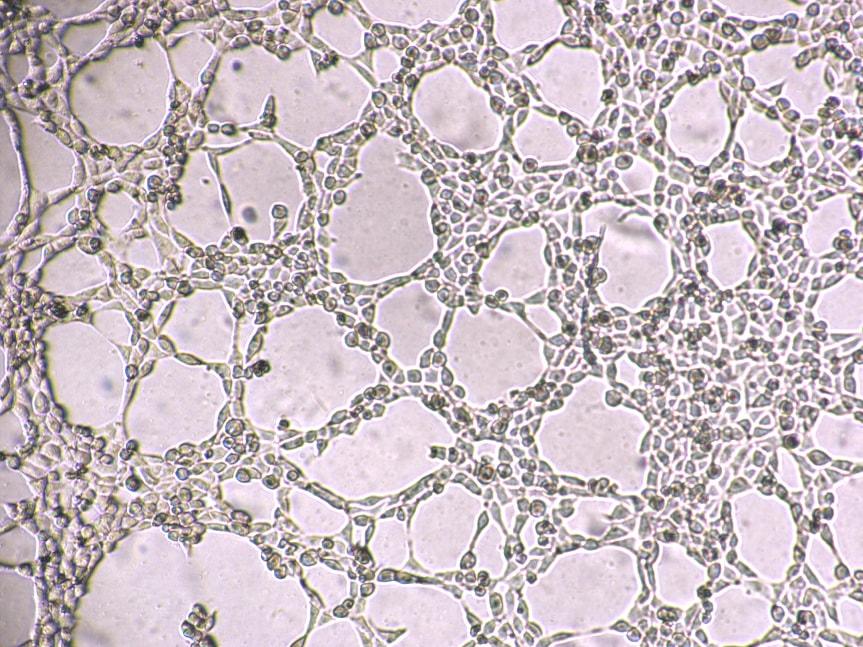


Repeat 3 A549-MAFF


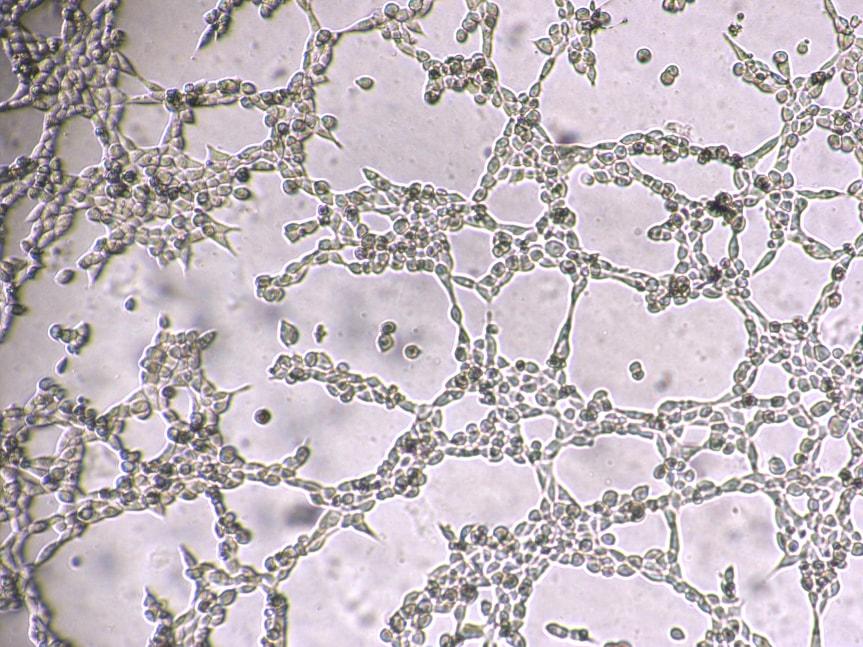

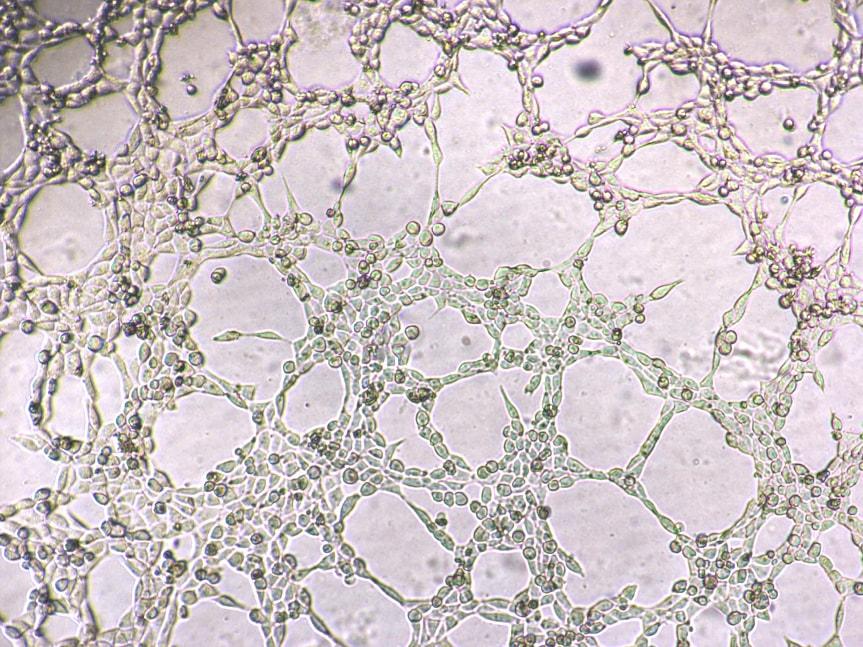

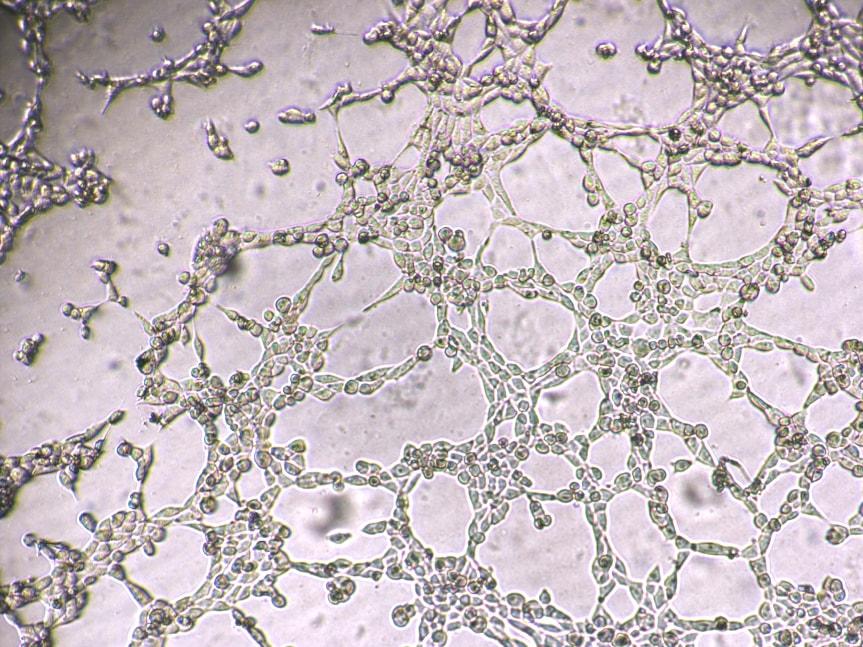

Supplement: Angiogenesis_Formation.zip [file A549.doc]

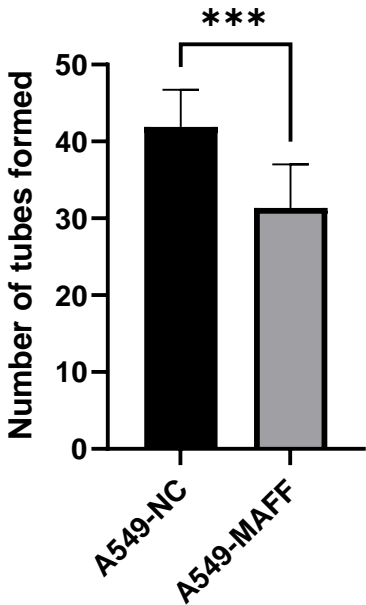

Supplement: Angiogenesis_Formation.zip [file A549.pdf › Angiogenesis Formation/A549.pdf]

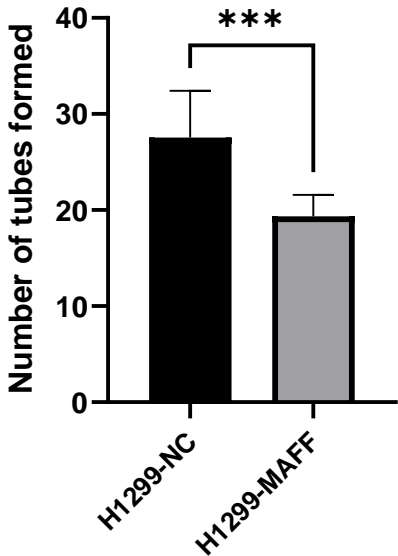

Supplement: Angiogenesis_Formation.zip [file H1299.pdf › Angiogenesis Formation/H1299.pdf]

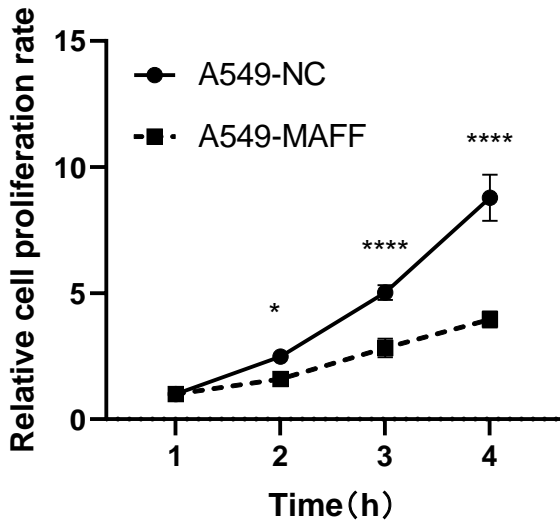

Supplement: CCK8.zip [file A549.pdf › CCK8/A549.pdf]

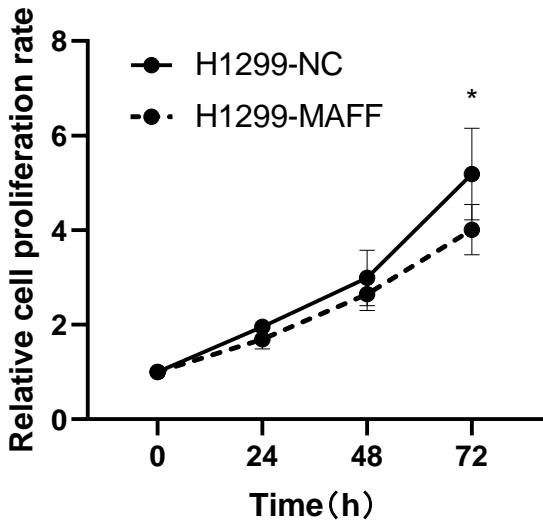

Supplement: CCK8.zip [file H1299.pdf › CCK8/H1299.pdf]

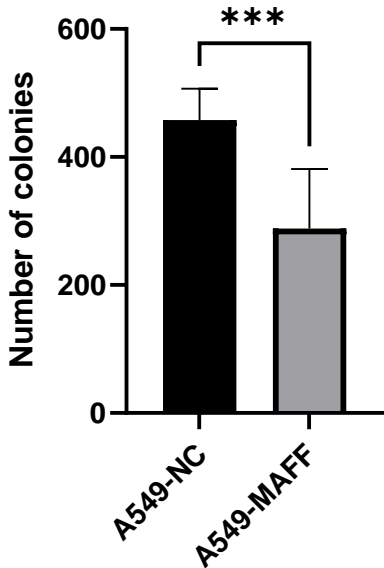

Supplement: Colony_Formation.zip [file A549 .pdf › Colony Formation/A549 .pdf]

Repeat 1 NC


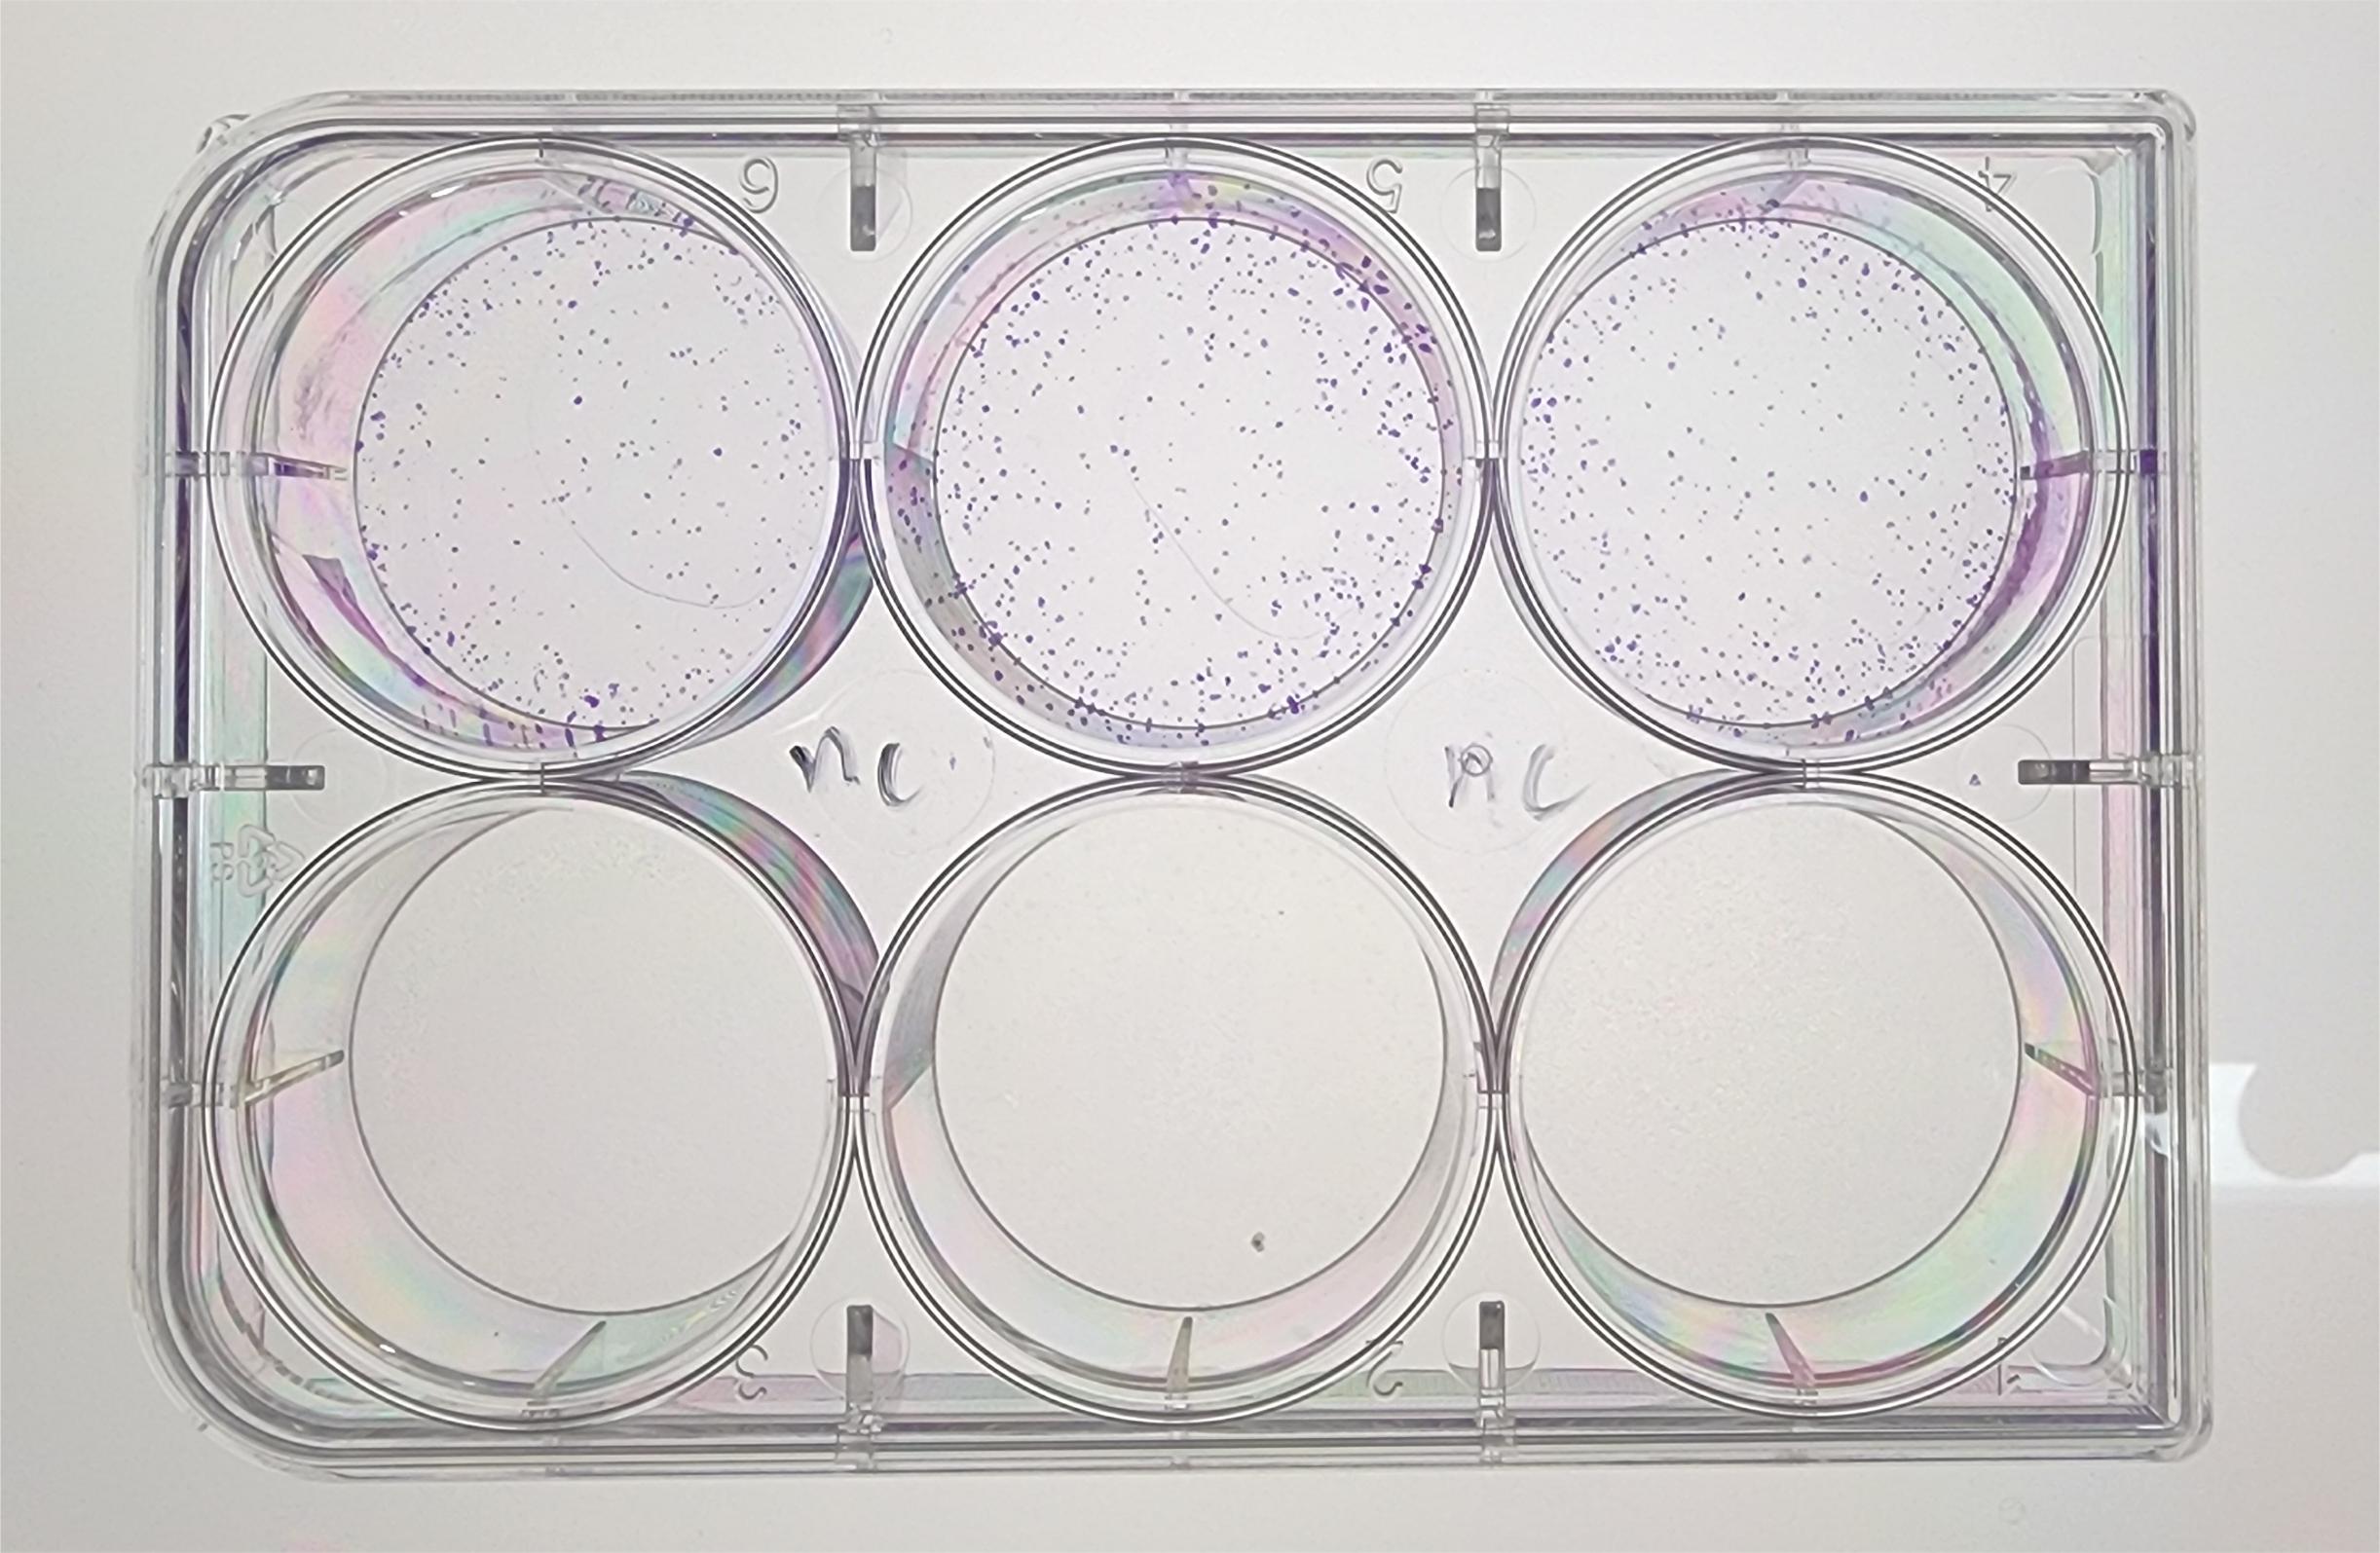

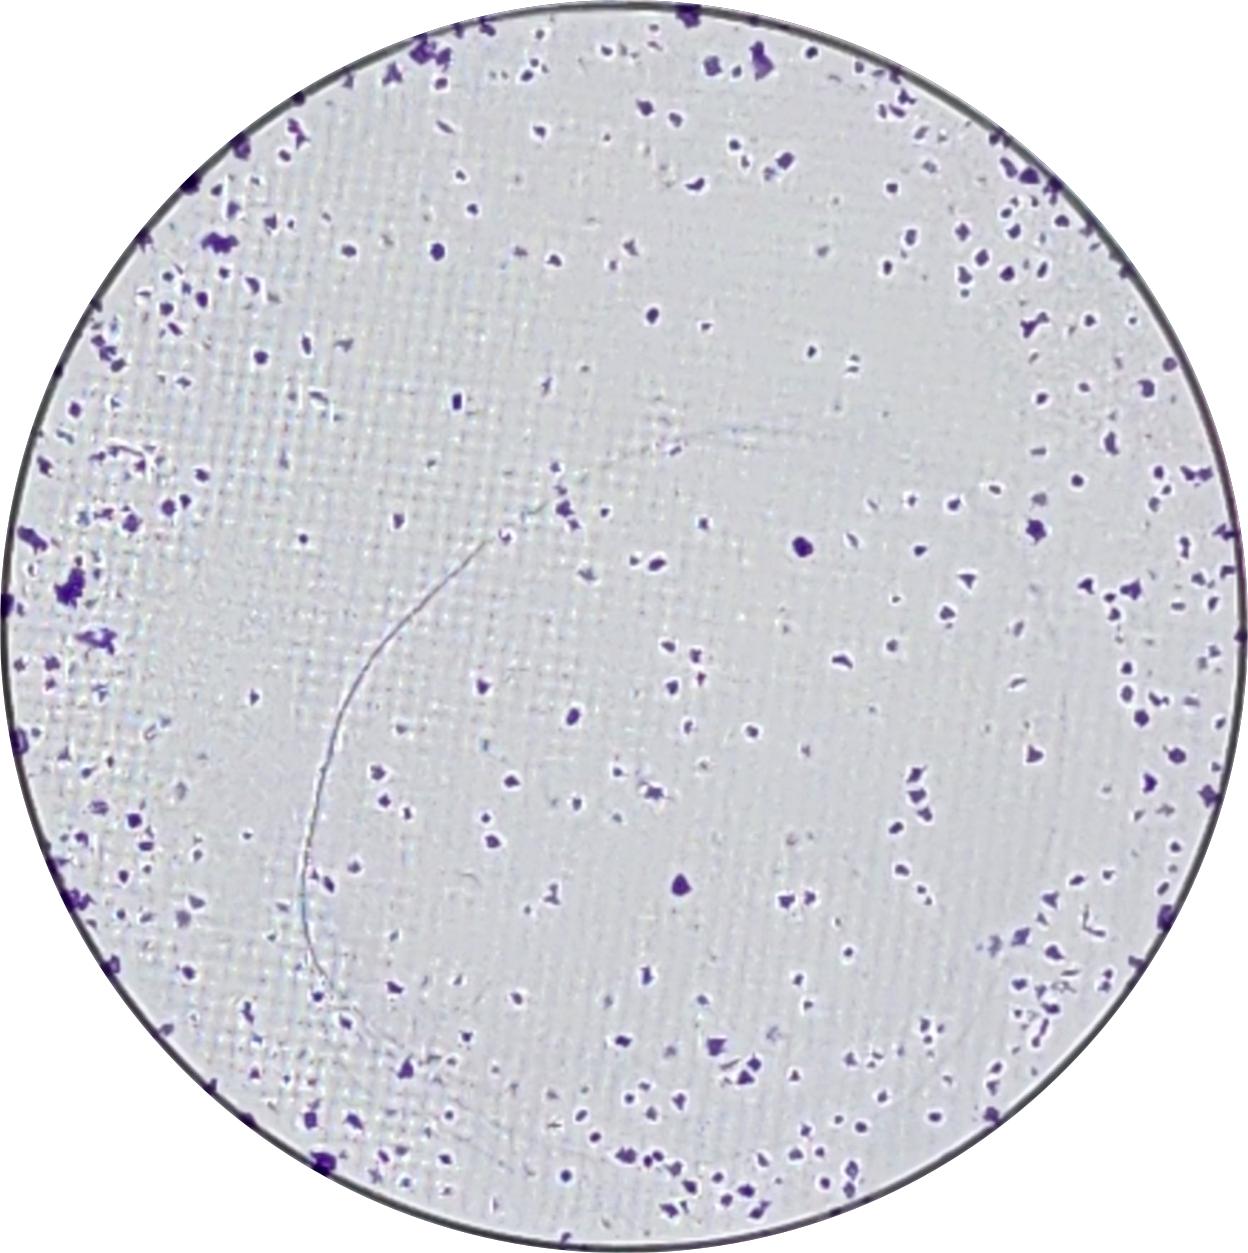

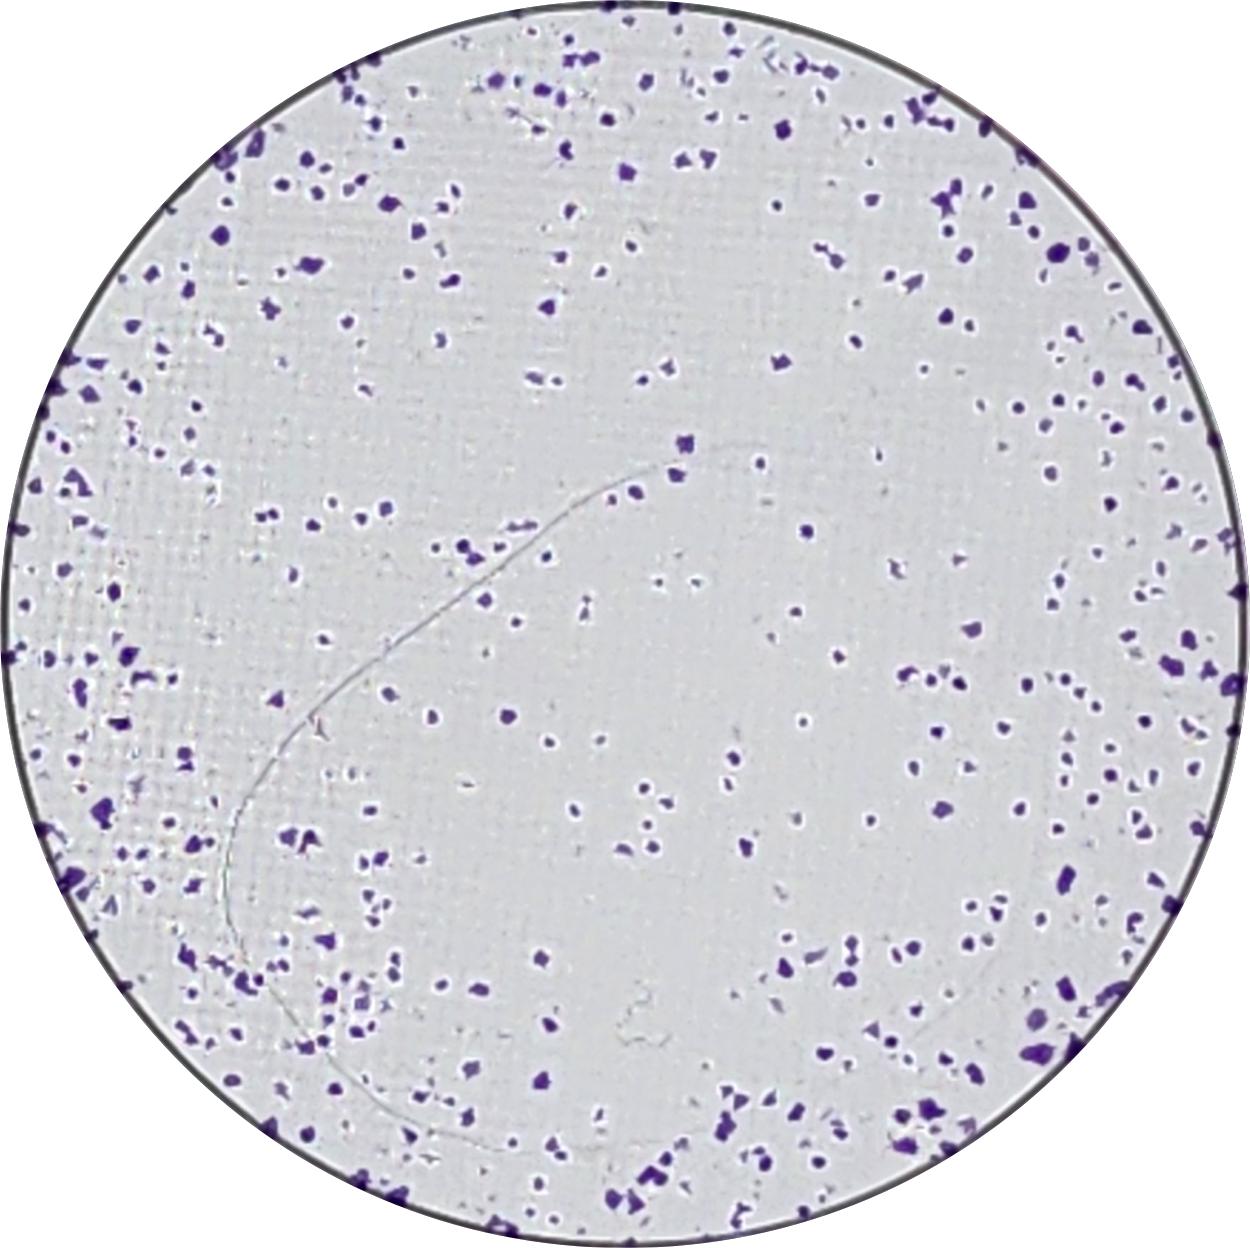

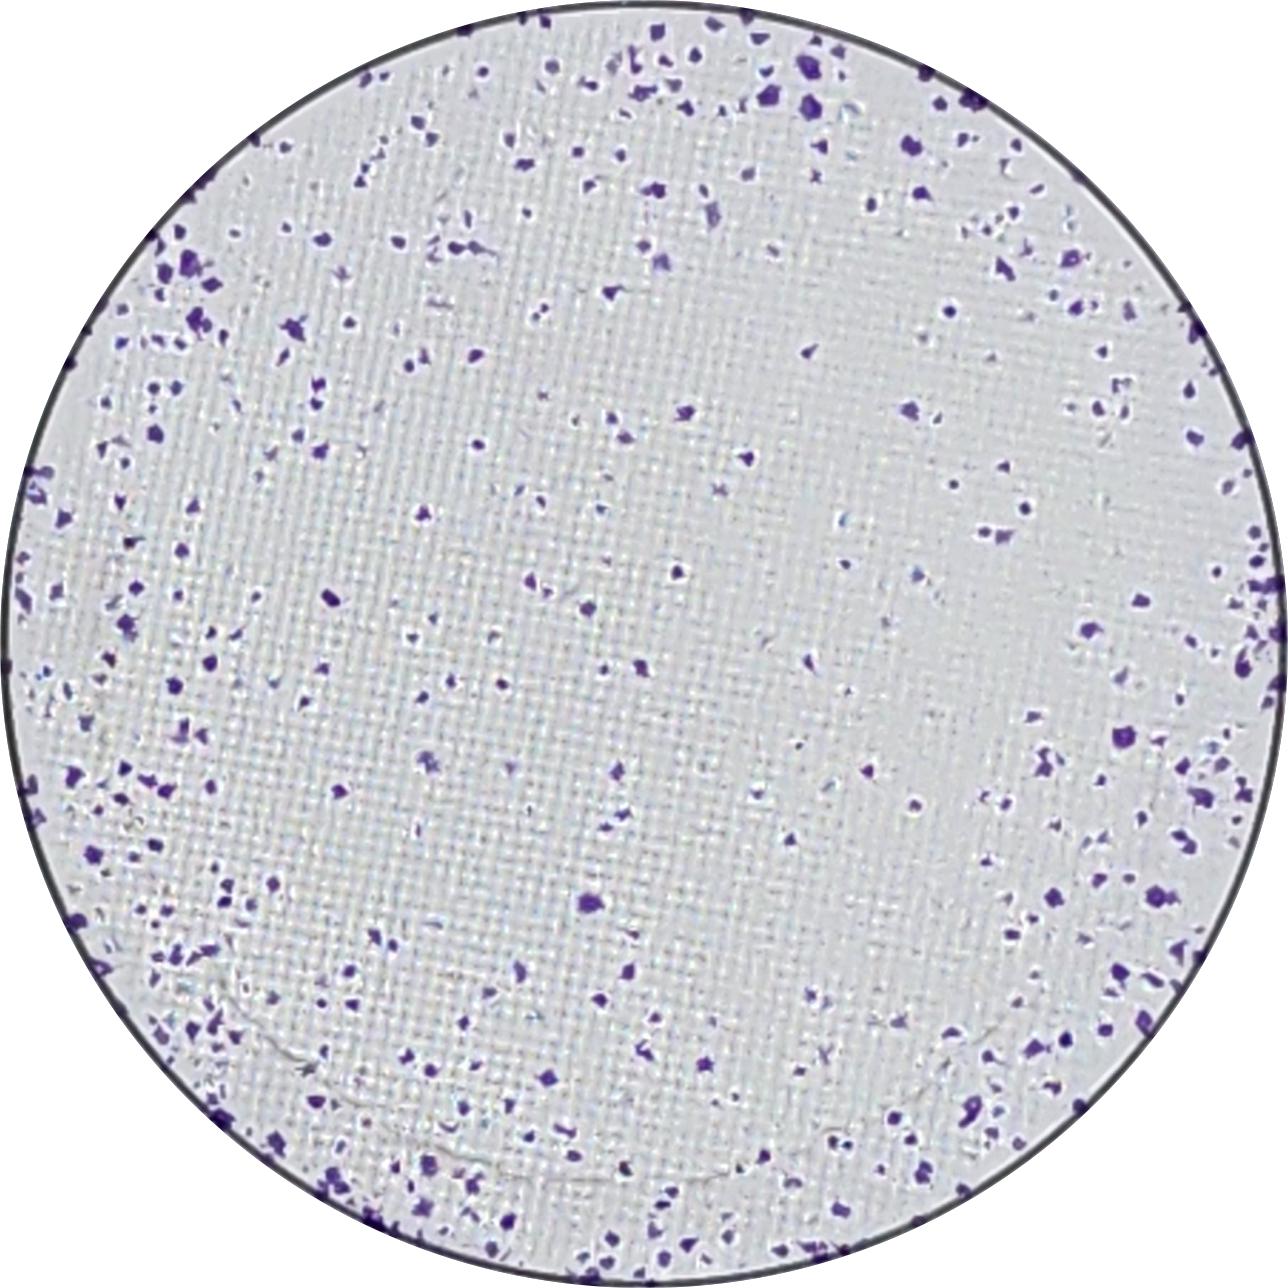


MAFF


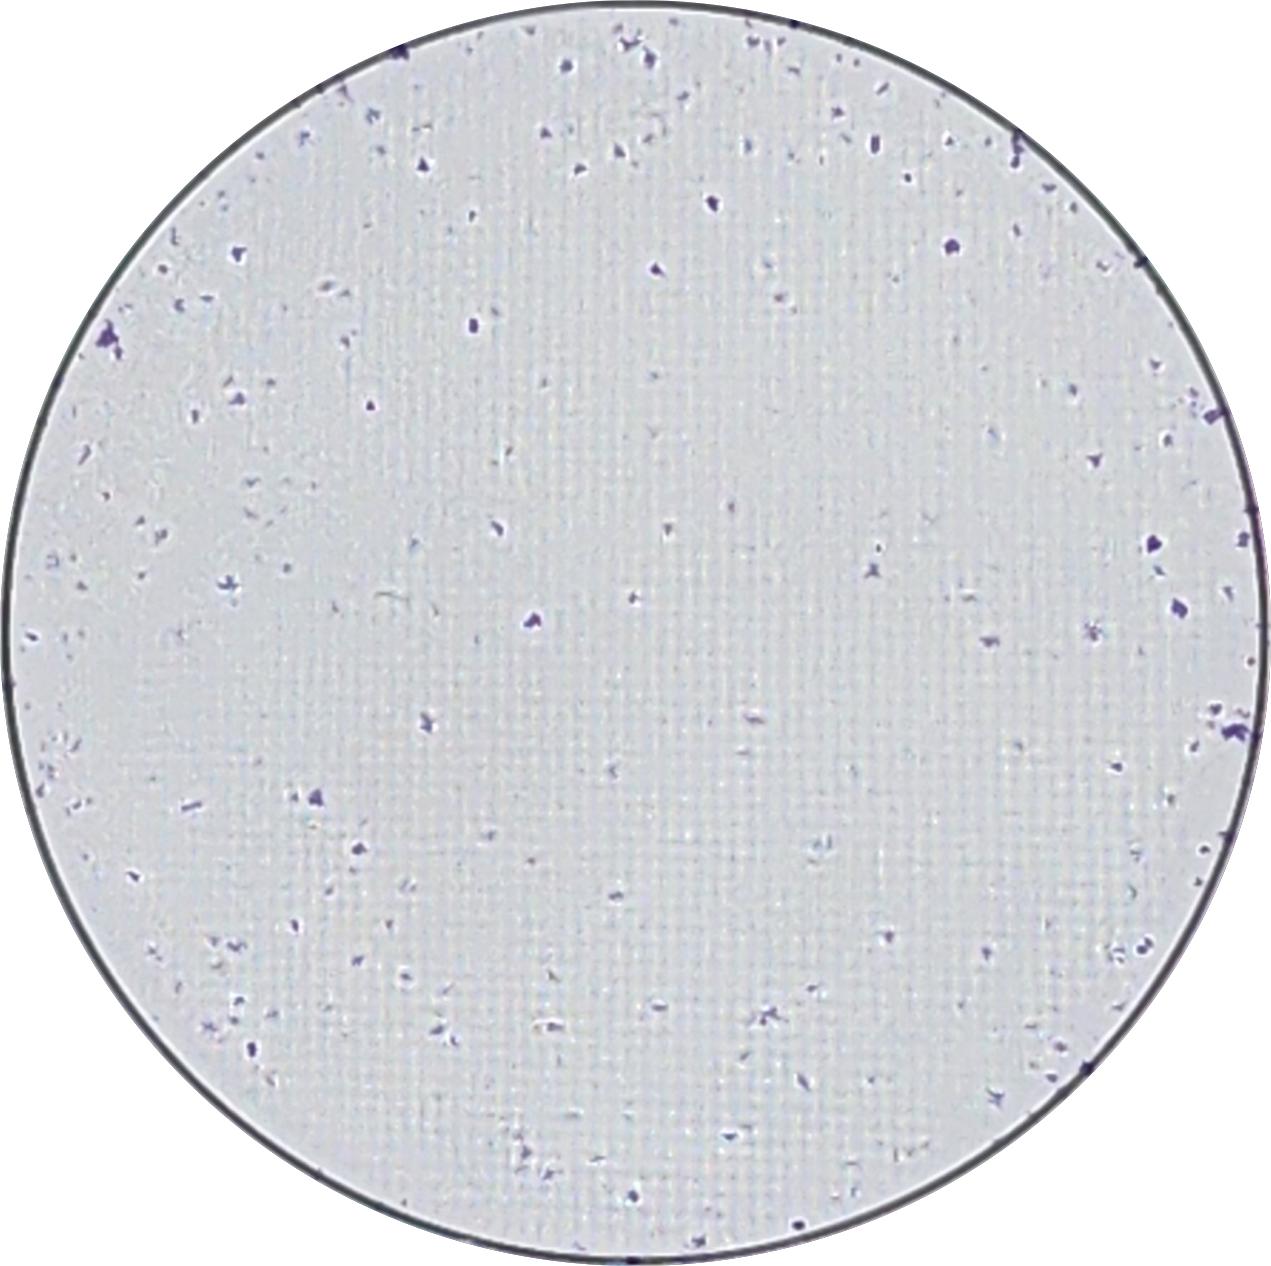

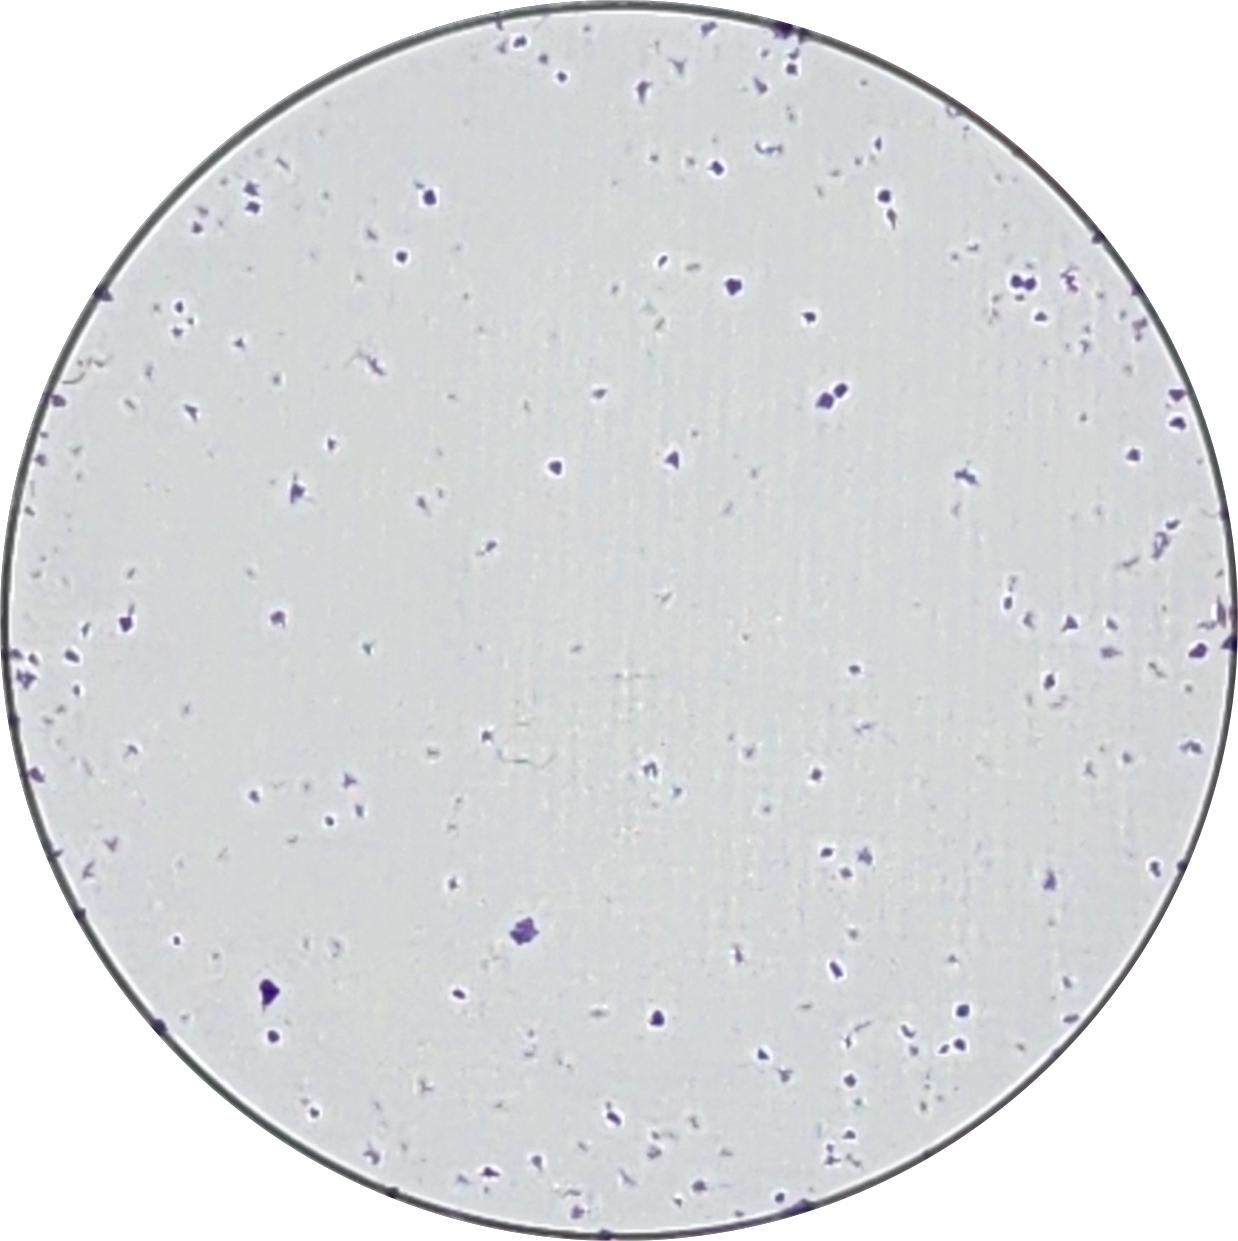

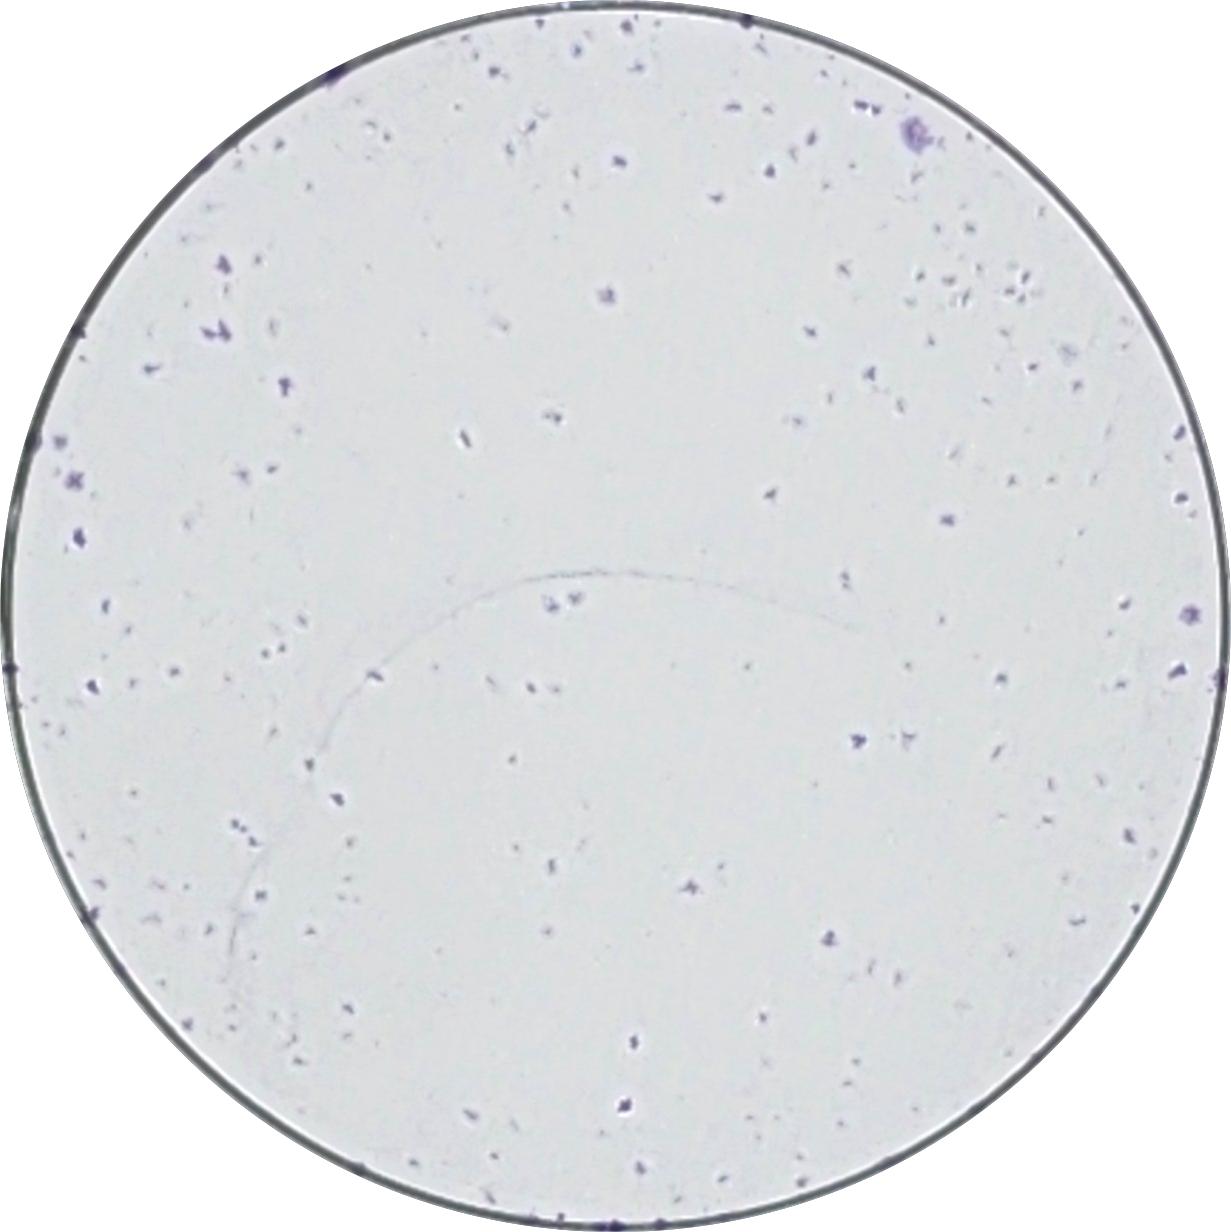


Repeat 2&3 NC


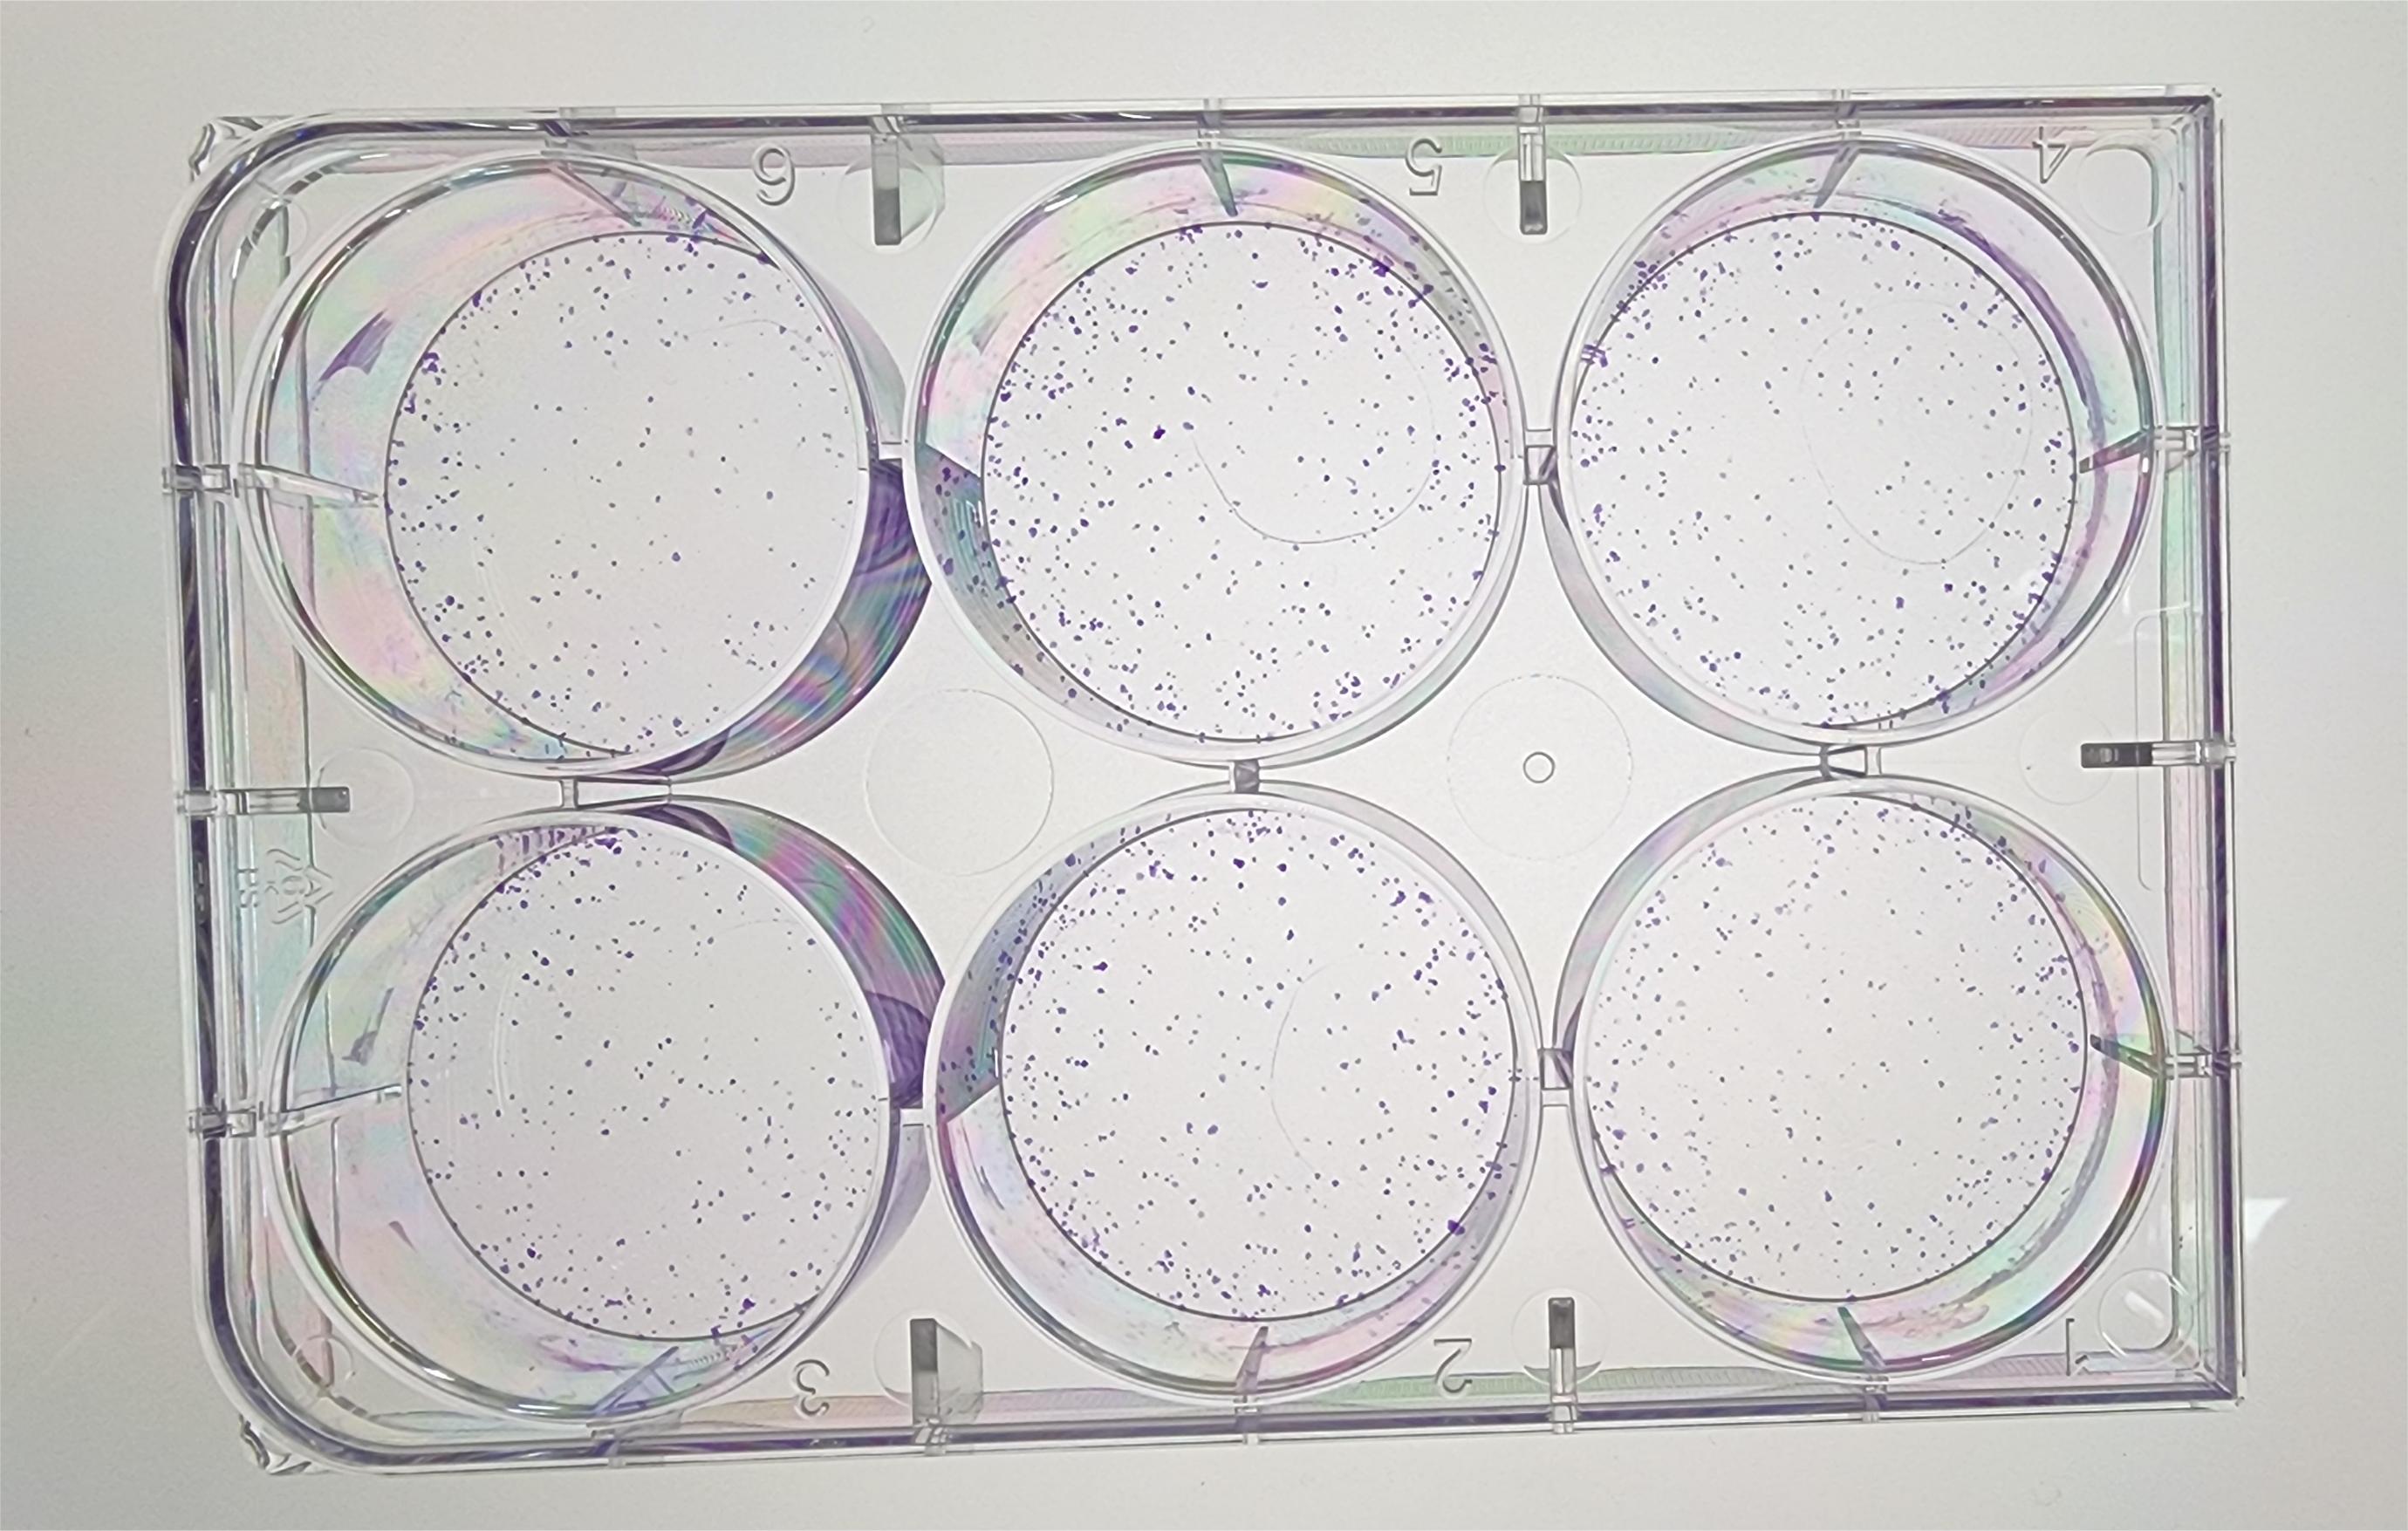


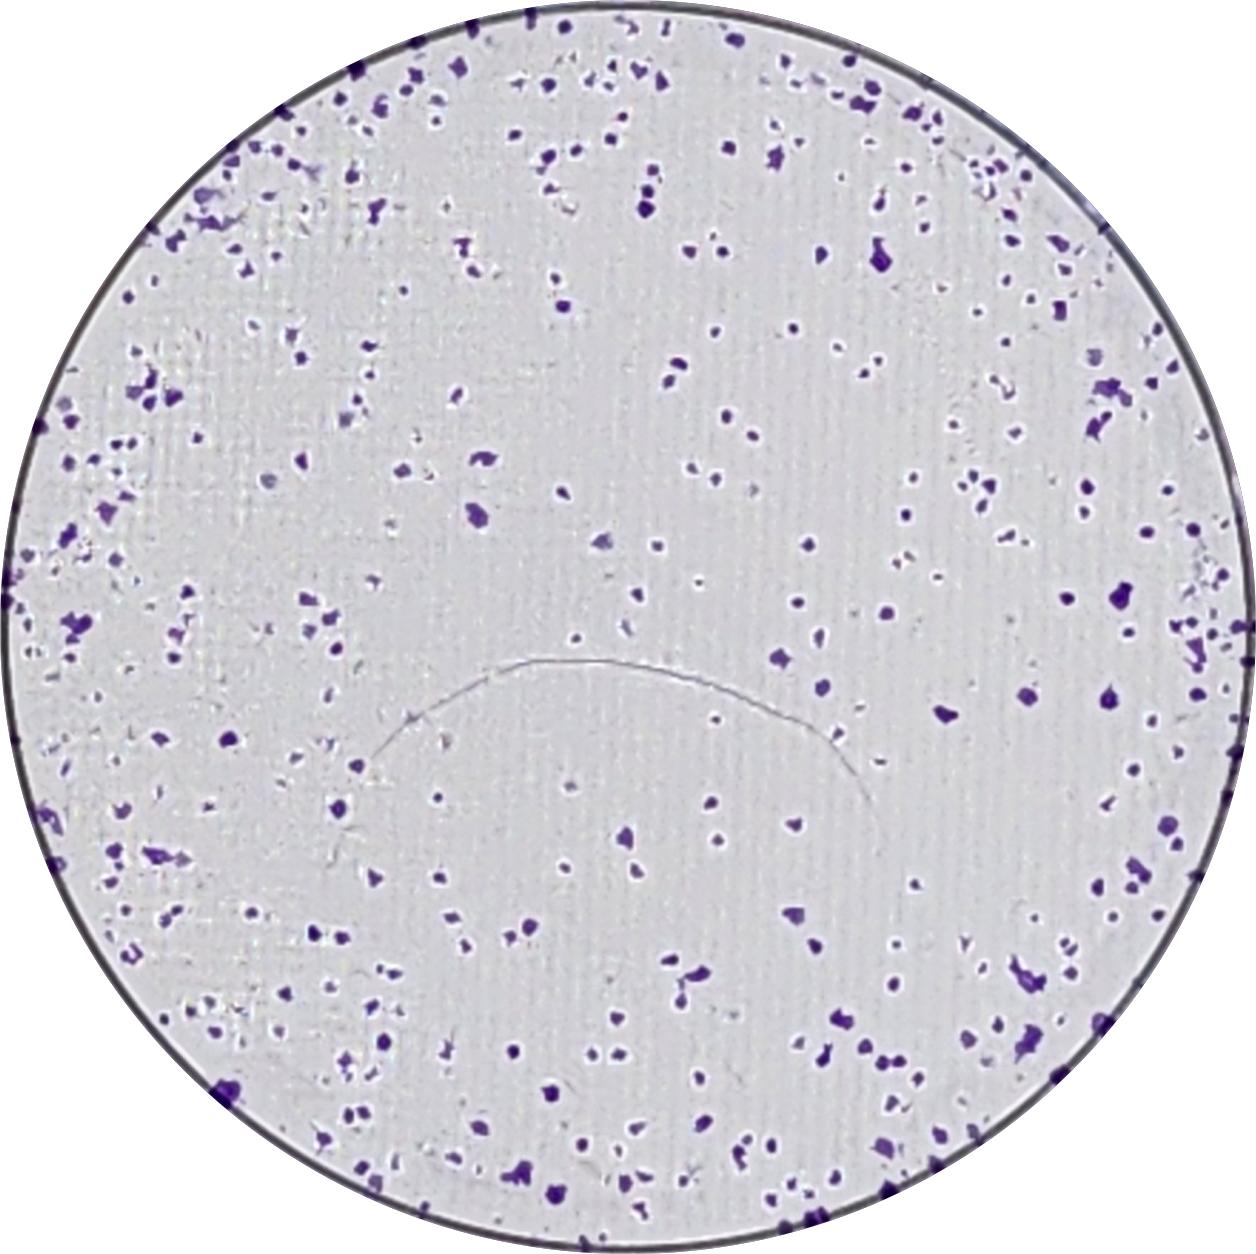

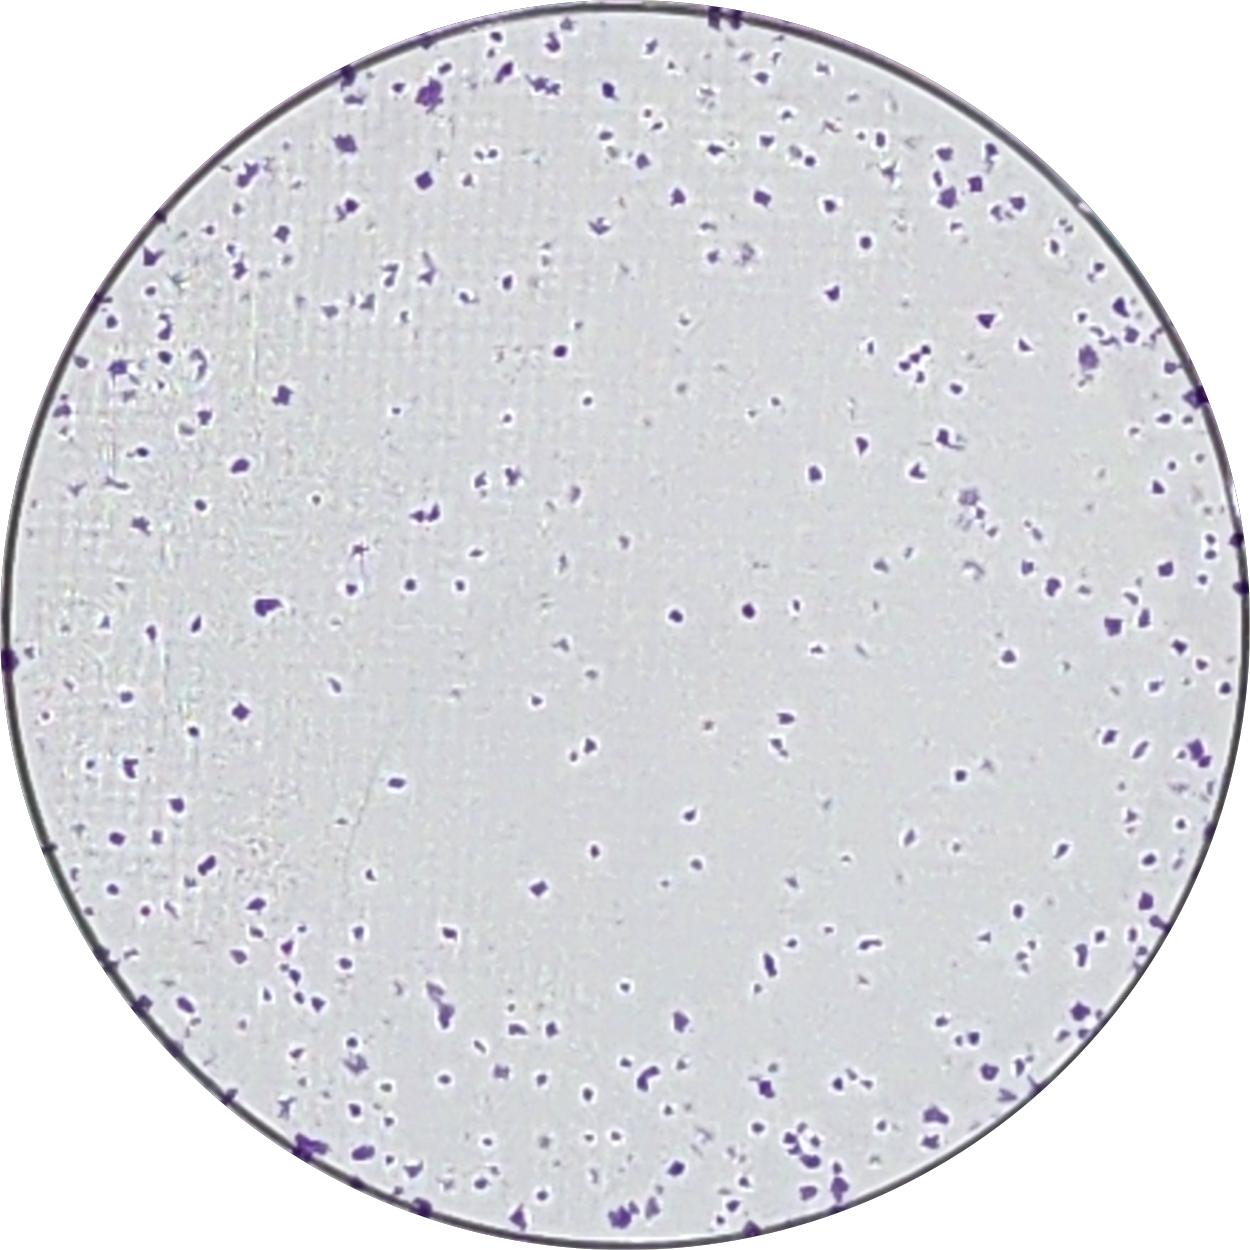

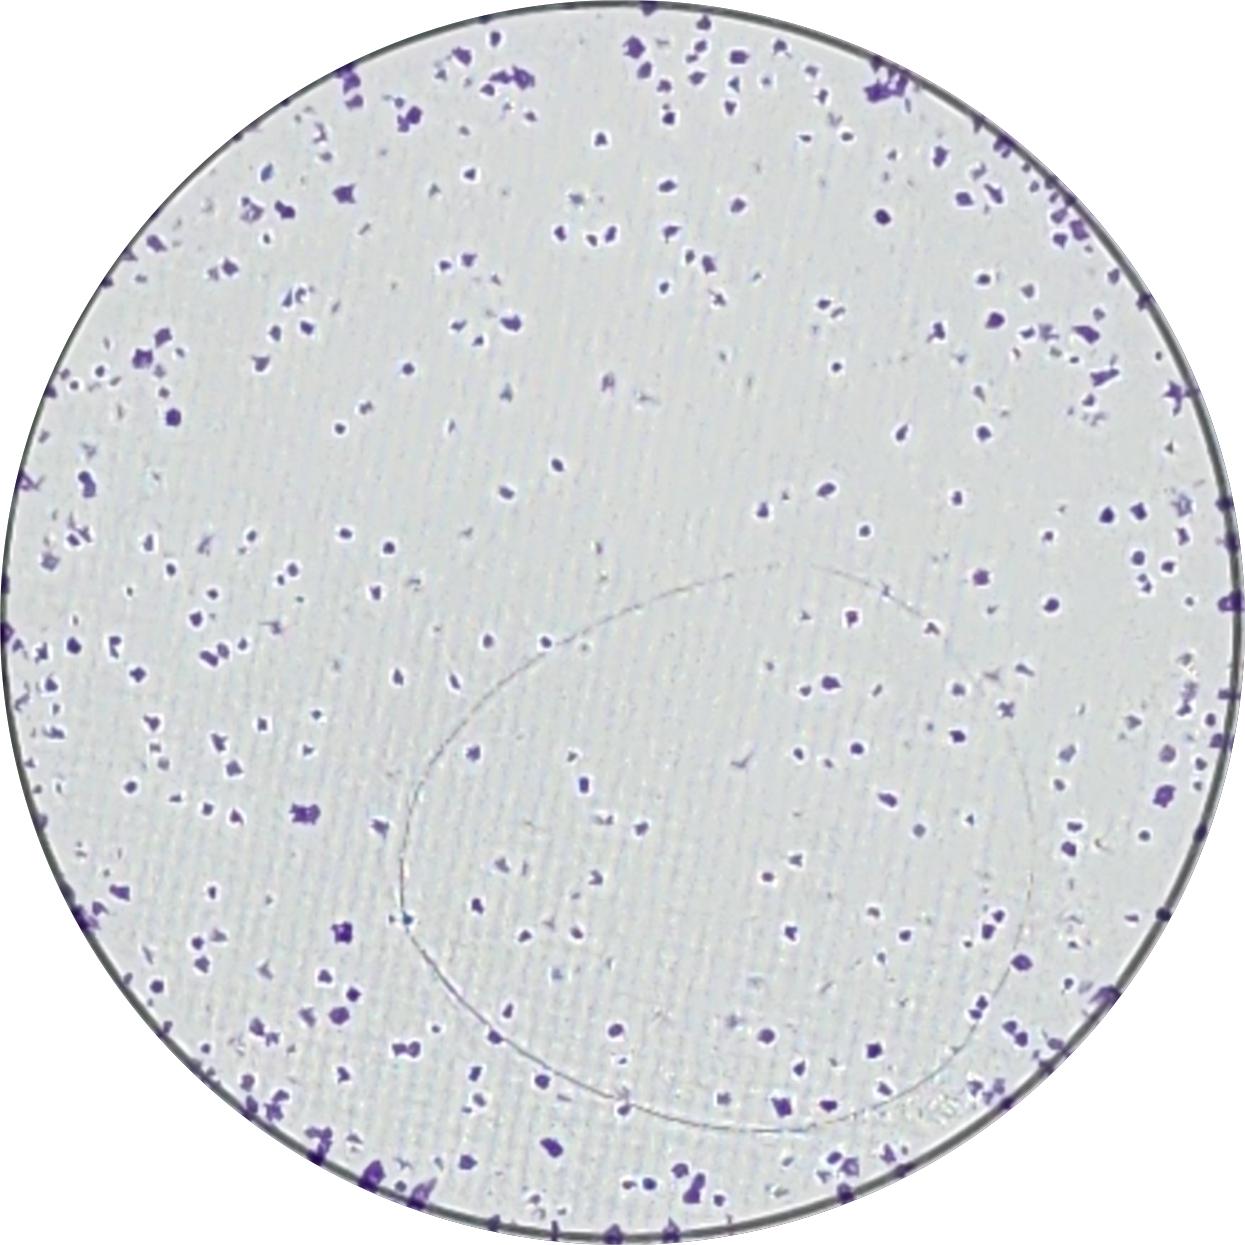

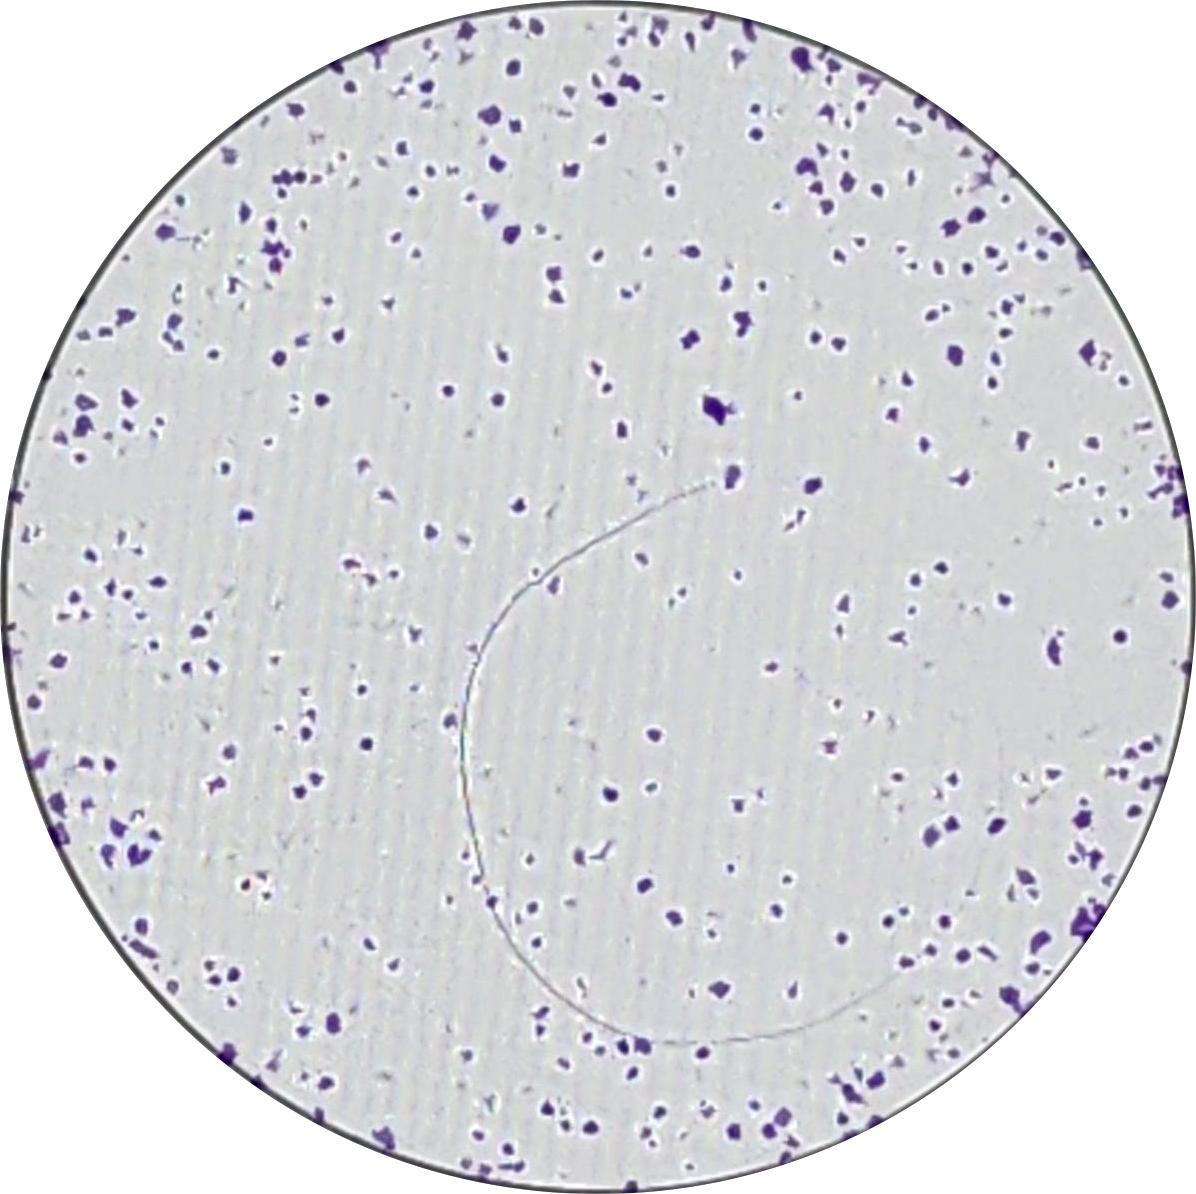

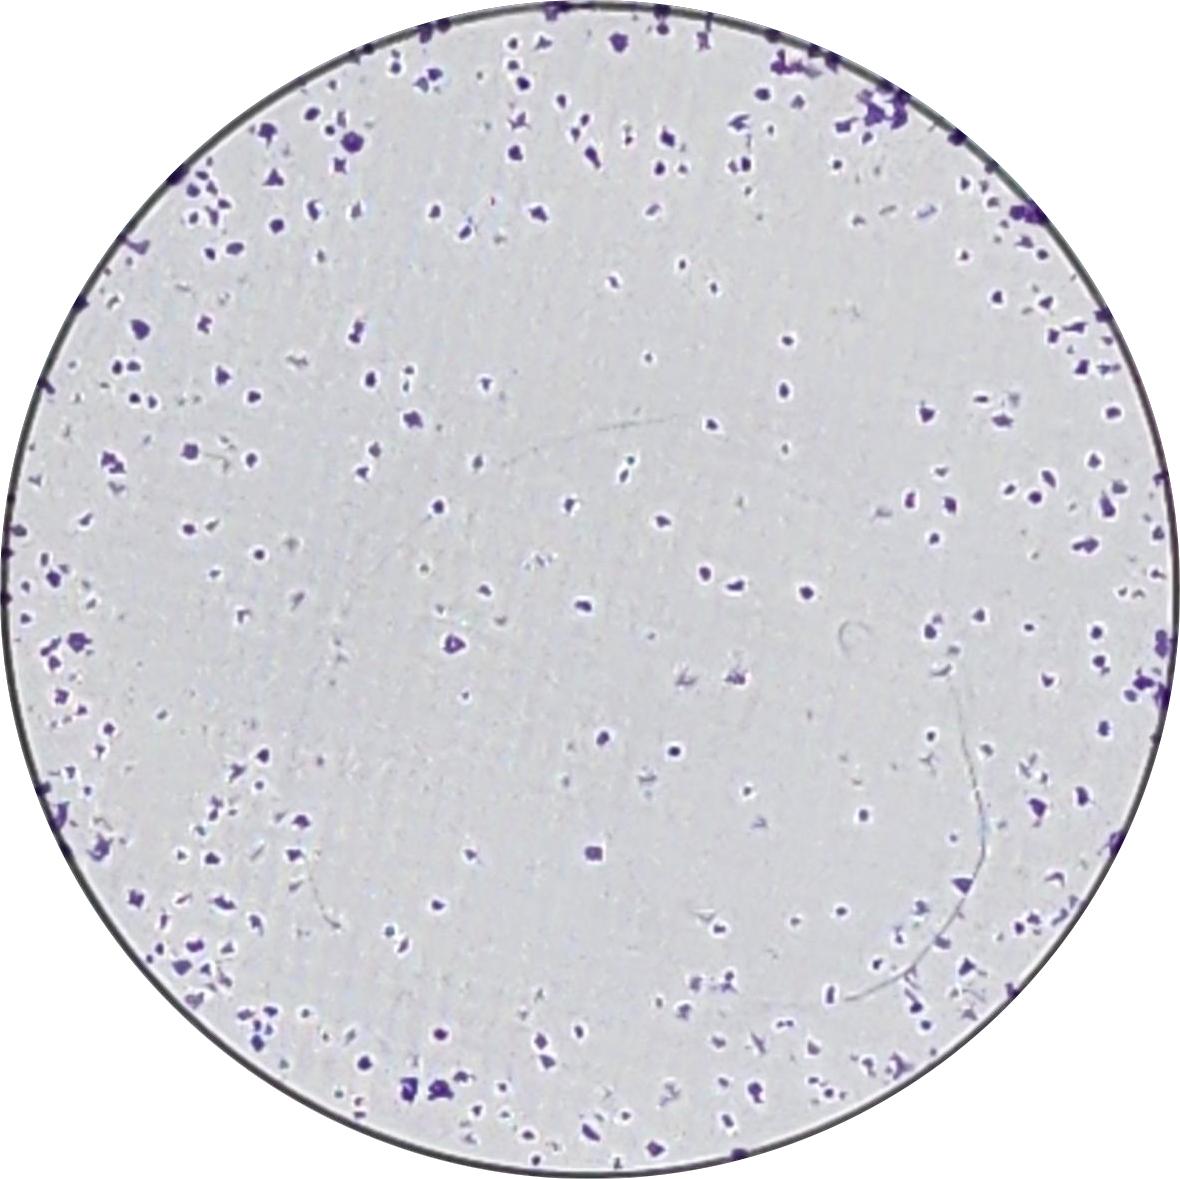

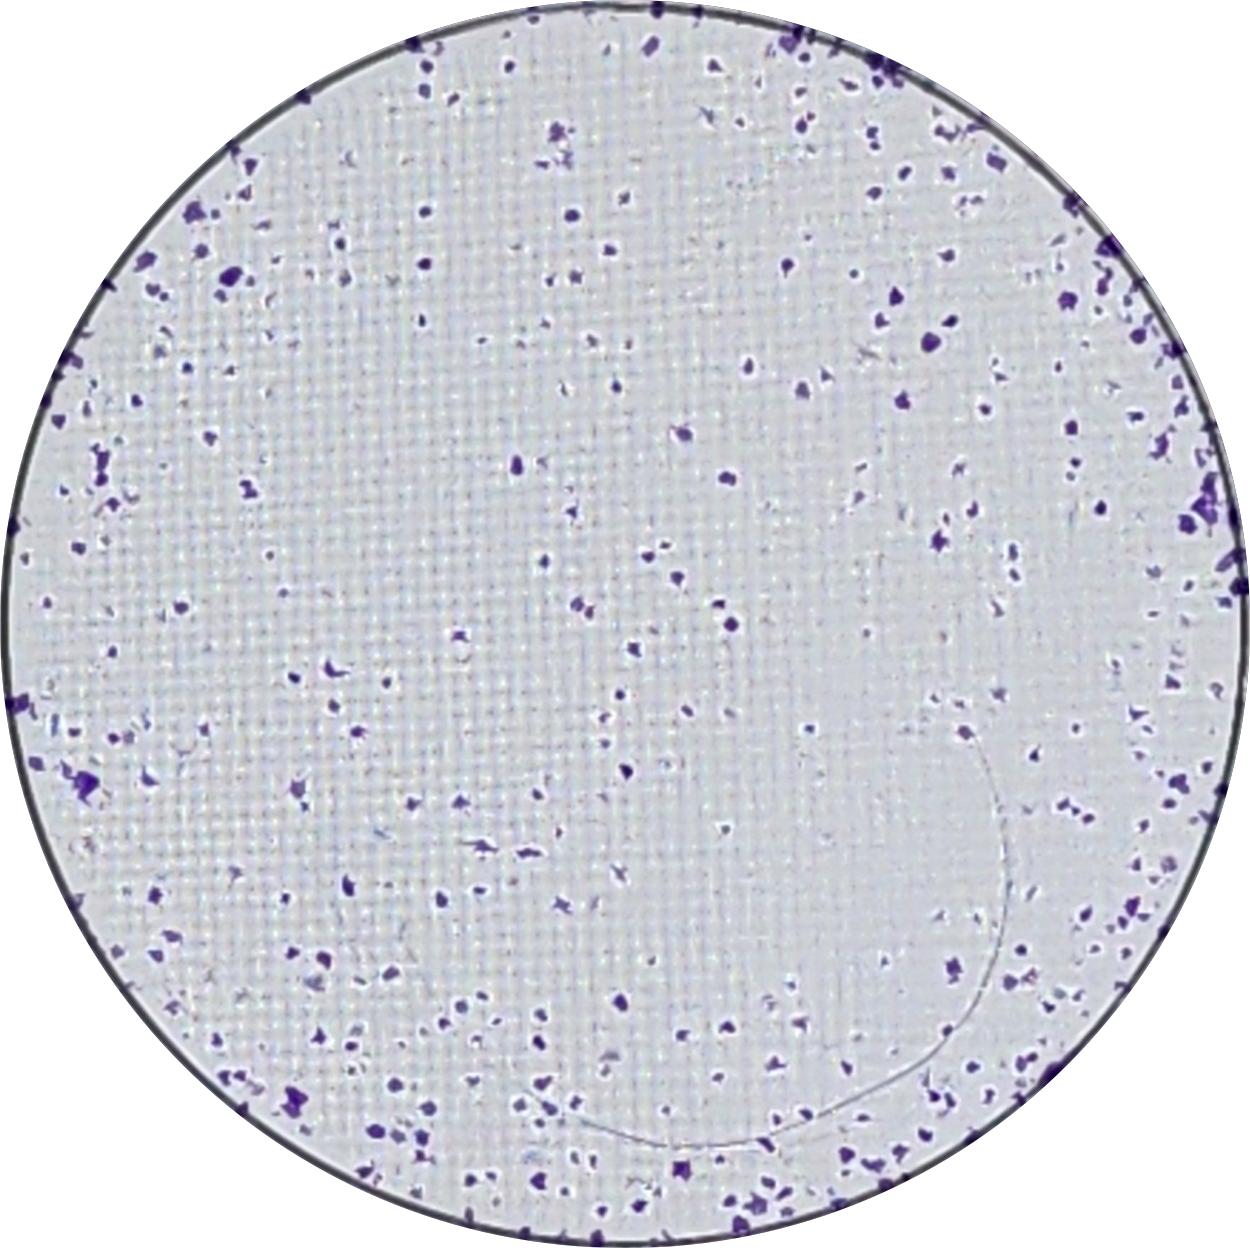


Repeat 2&3 MAFF


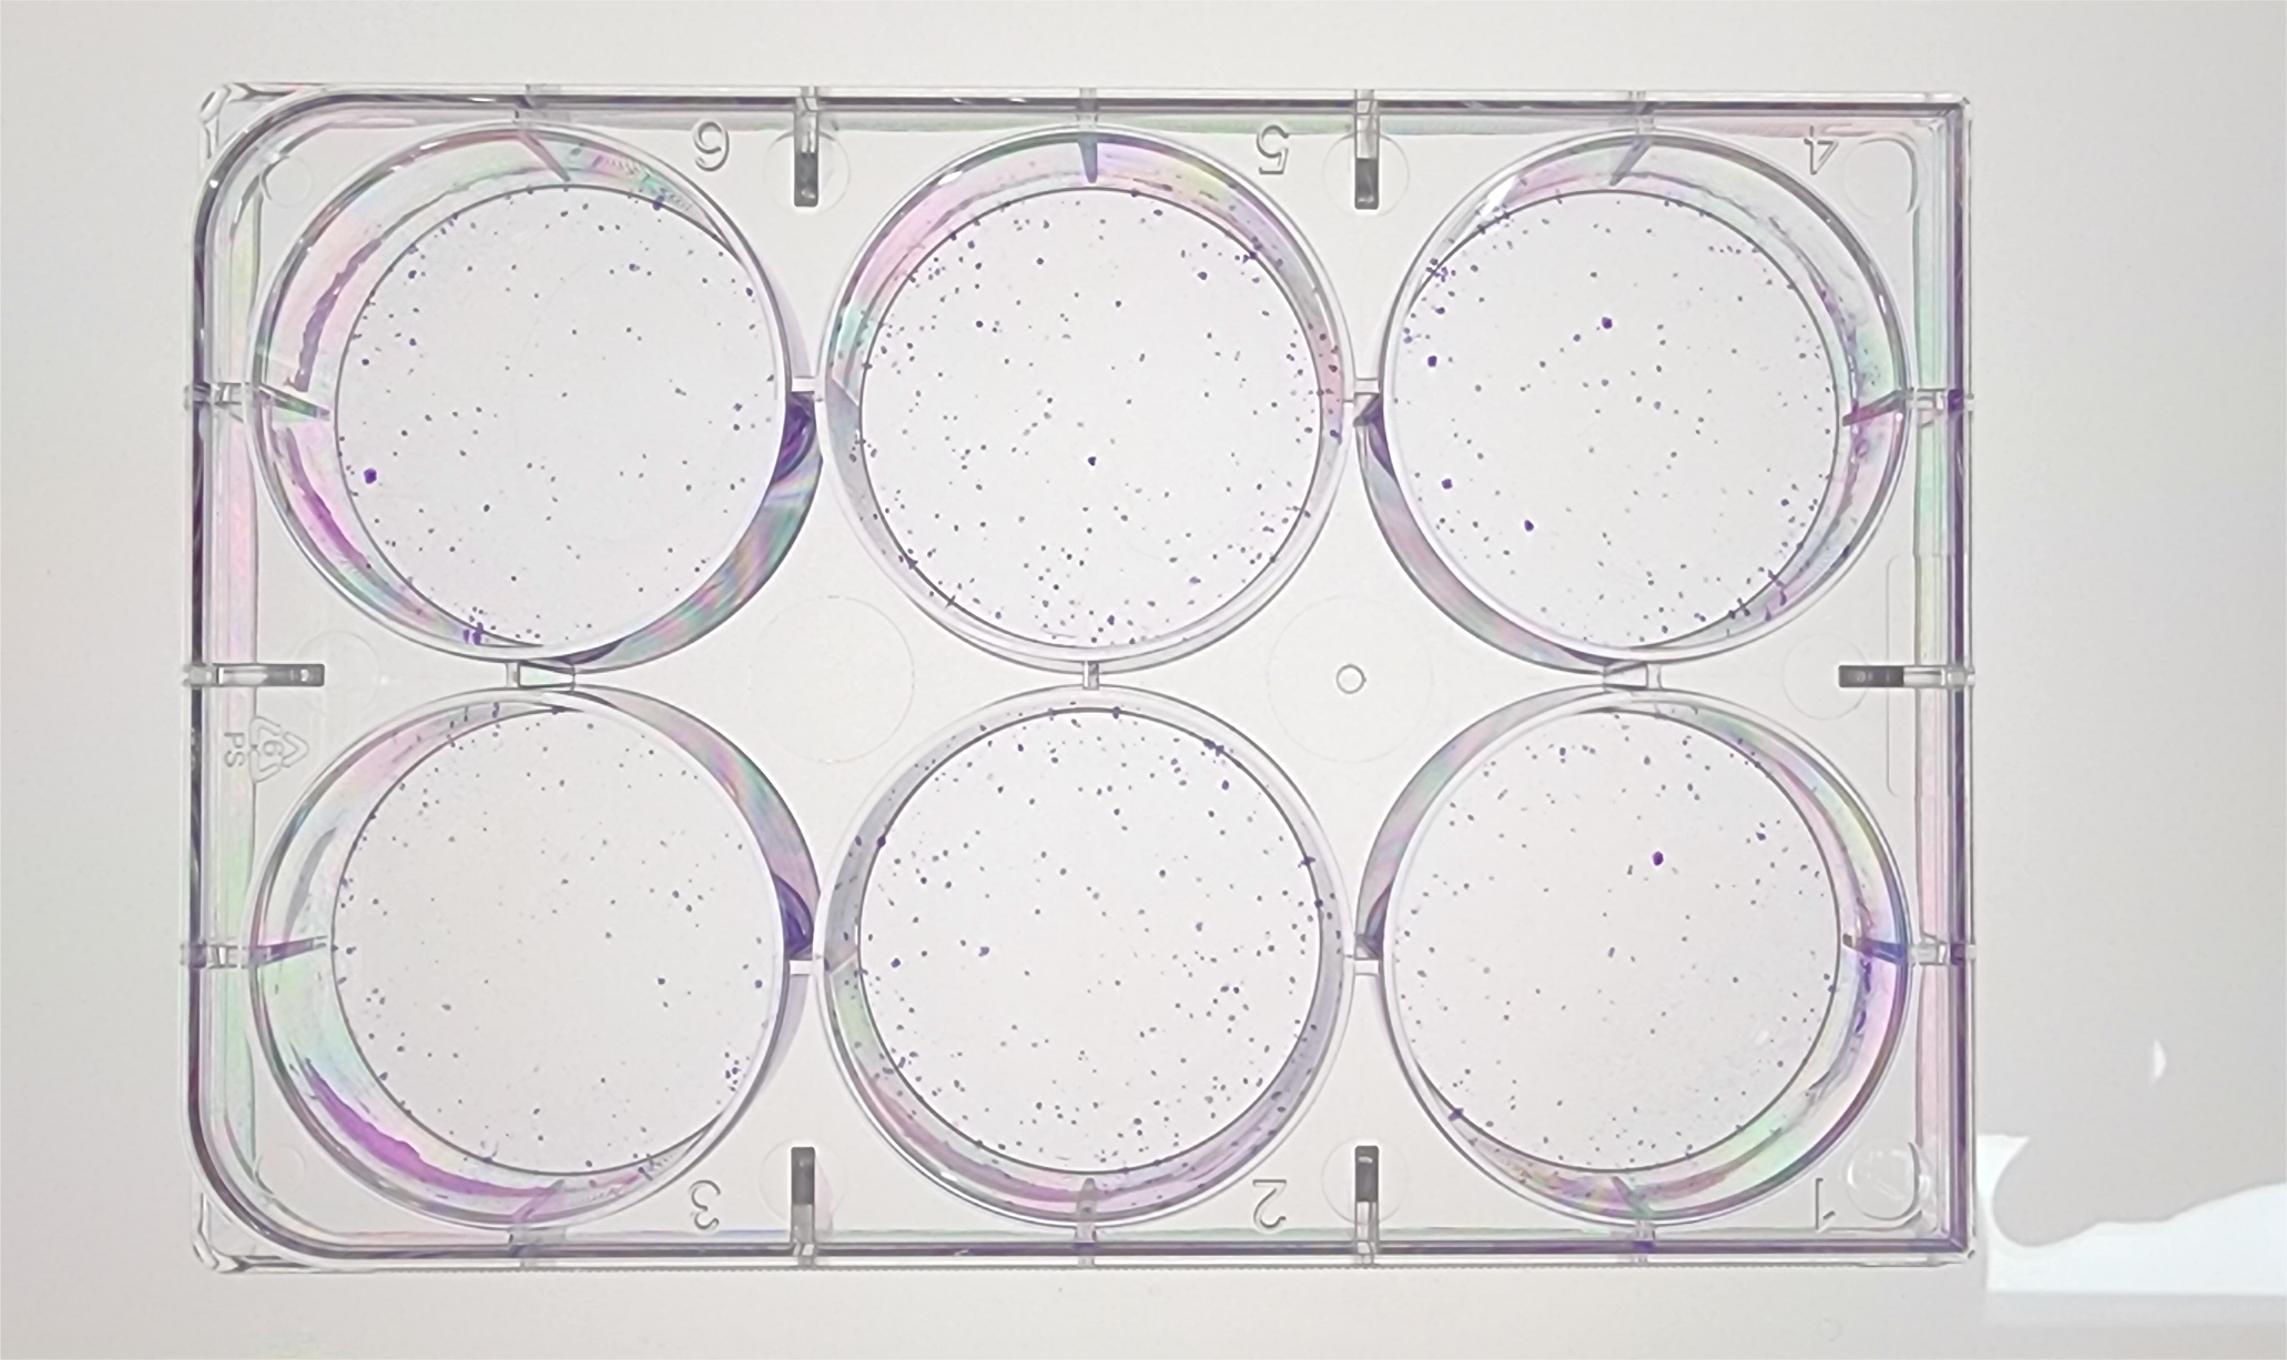


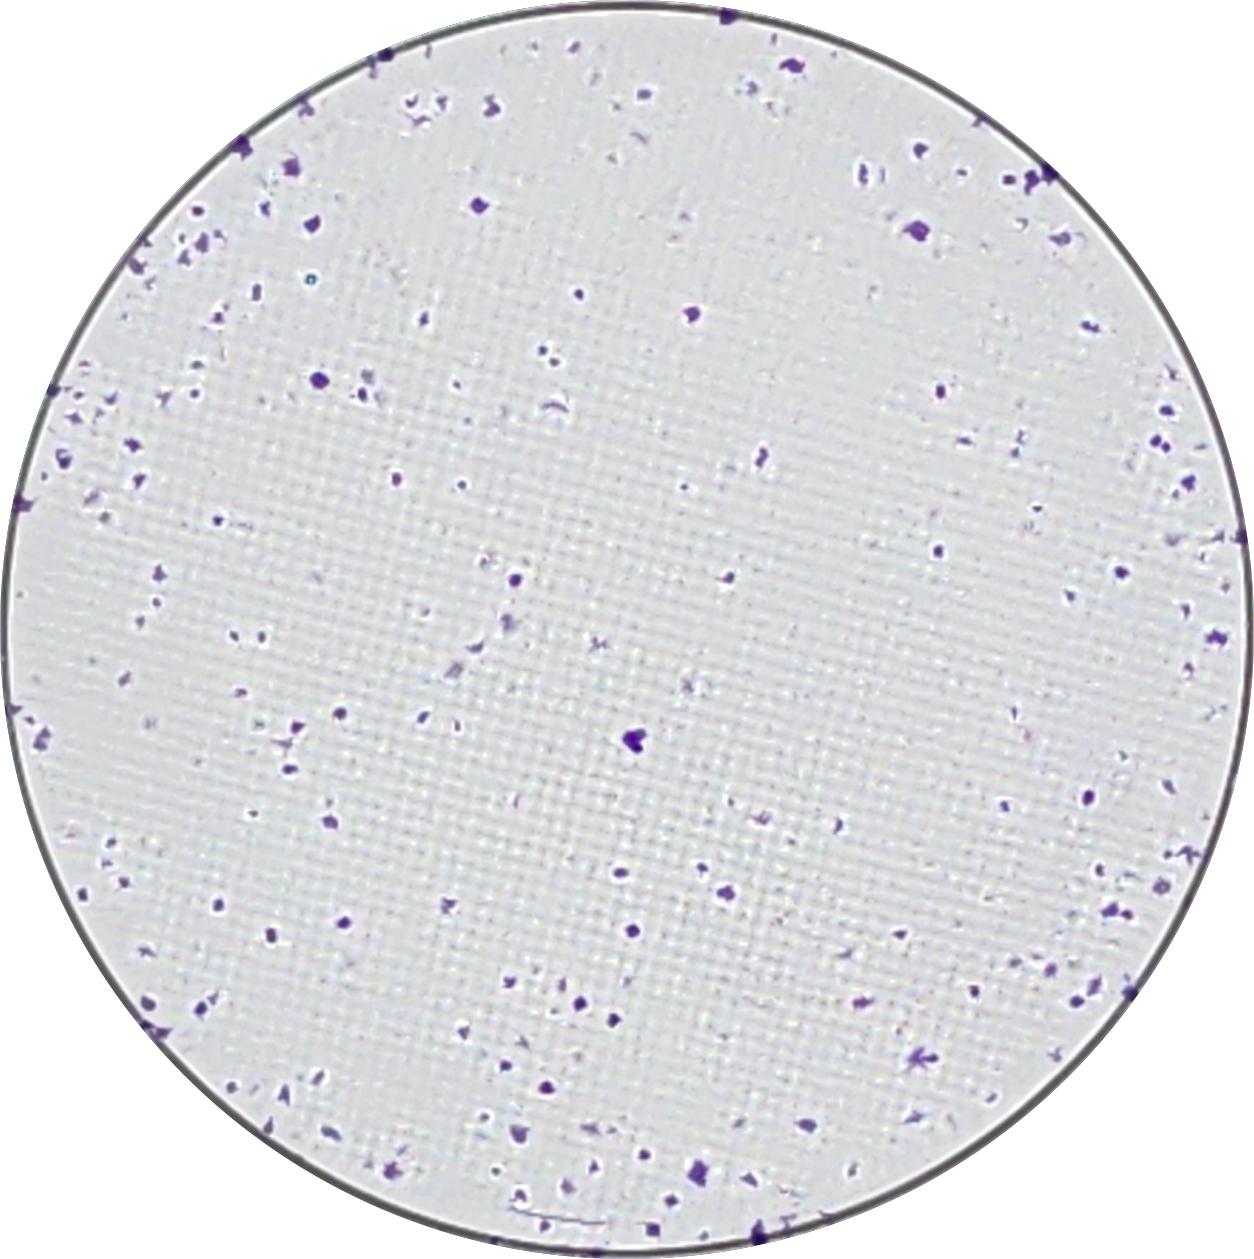

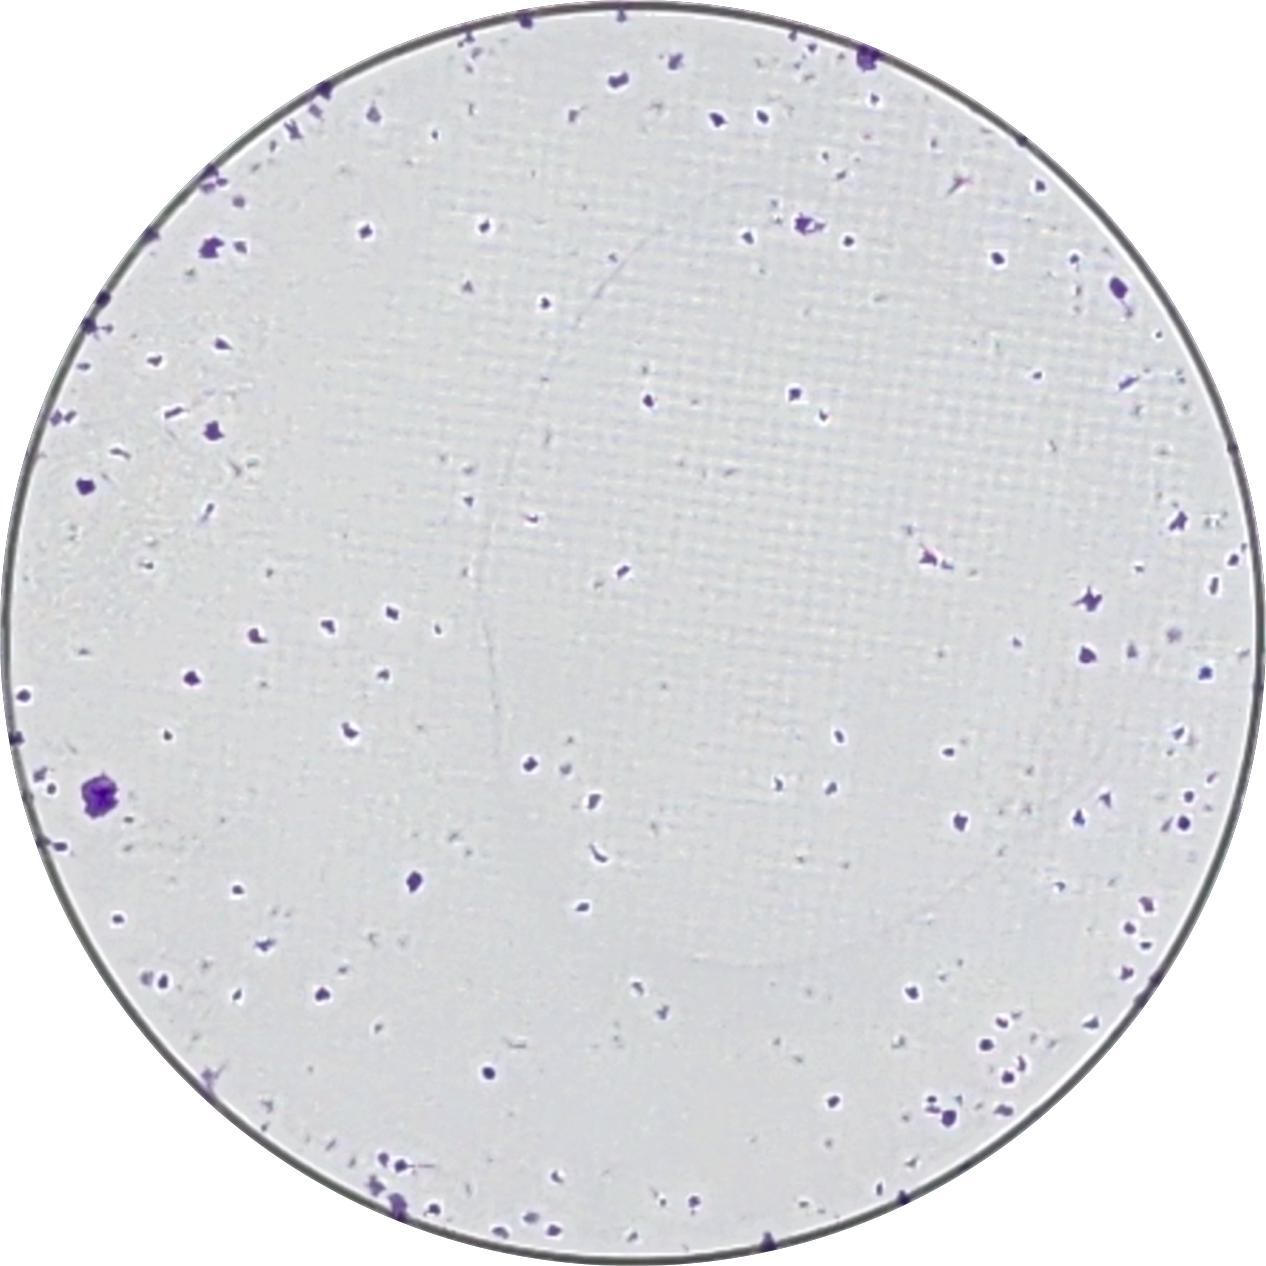

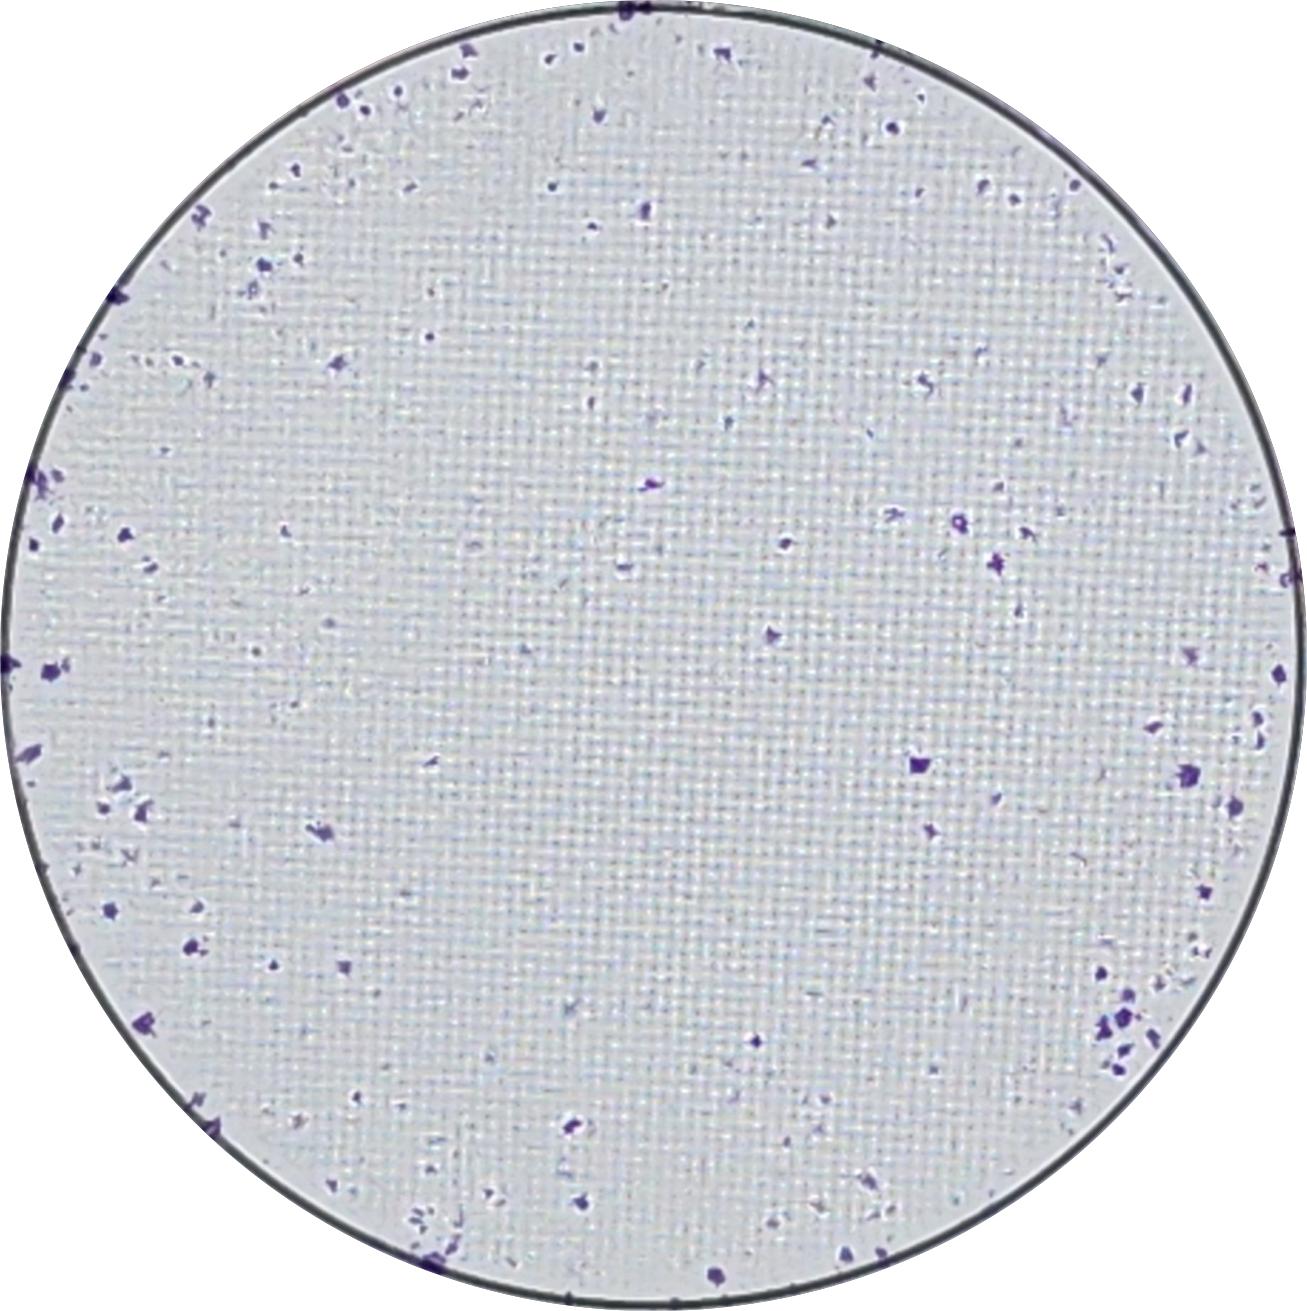

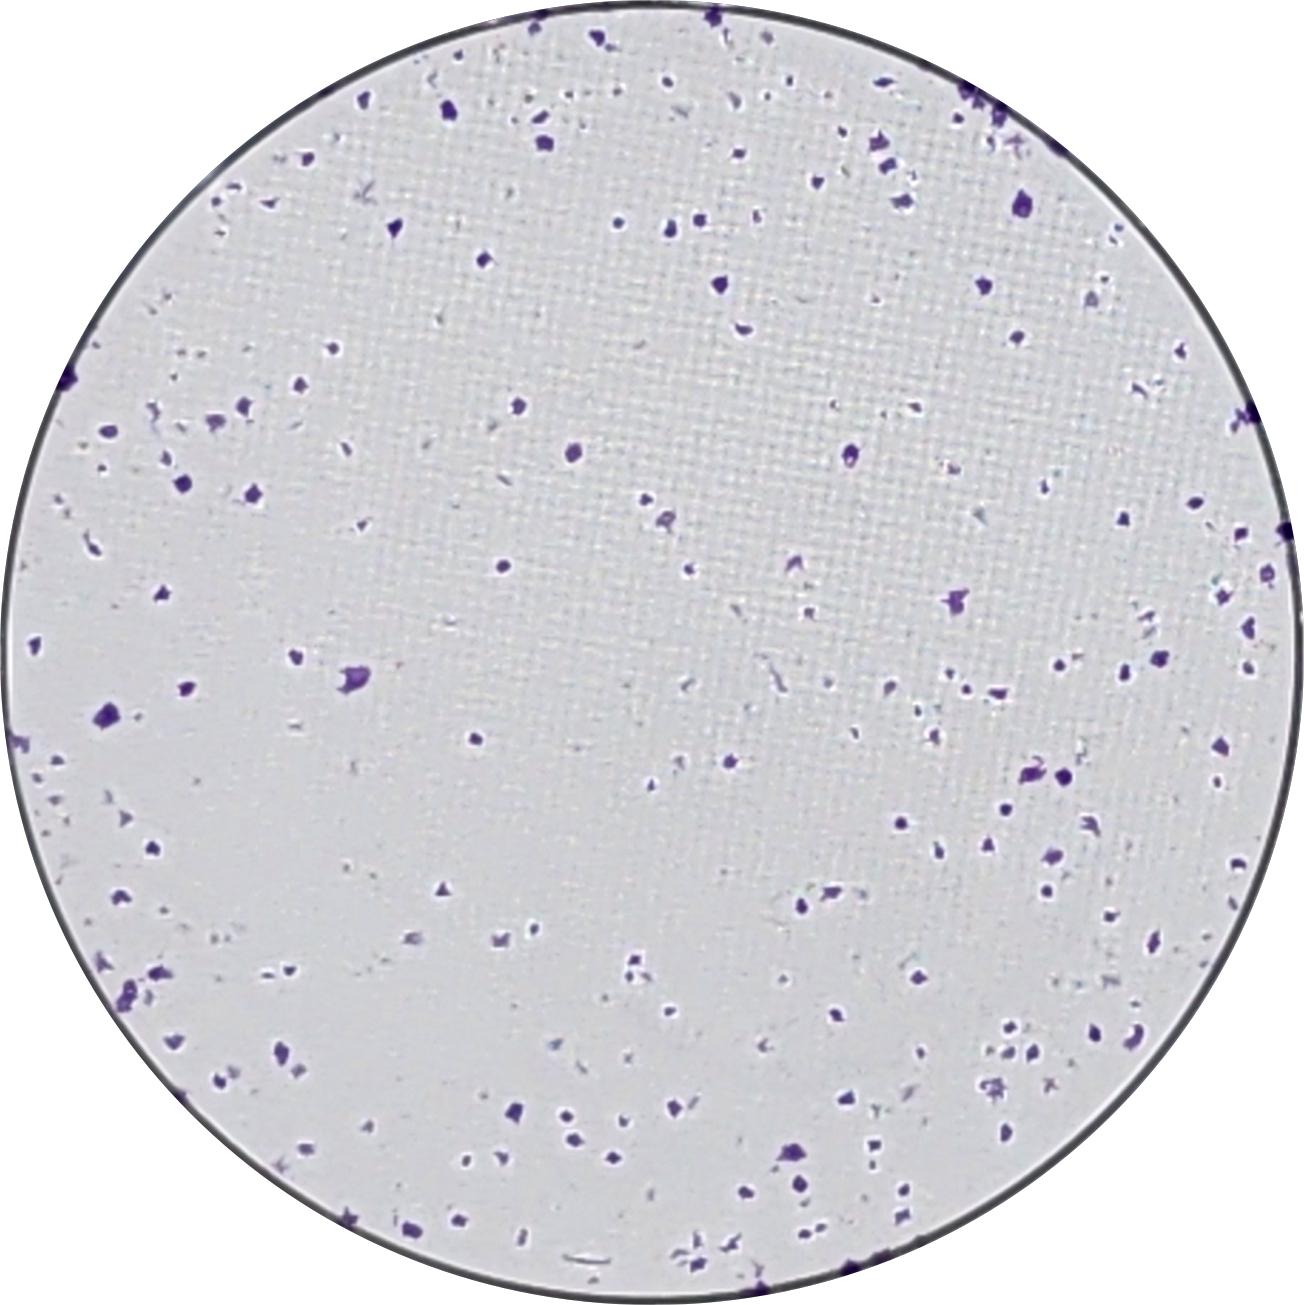

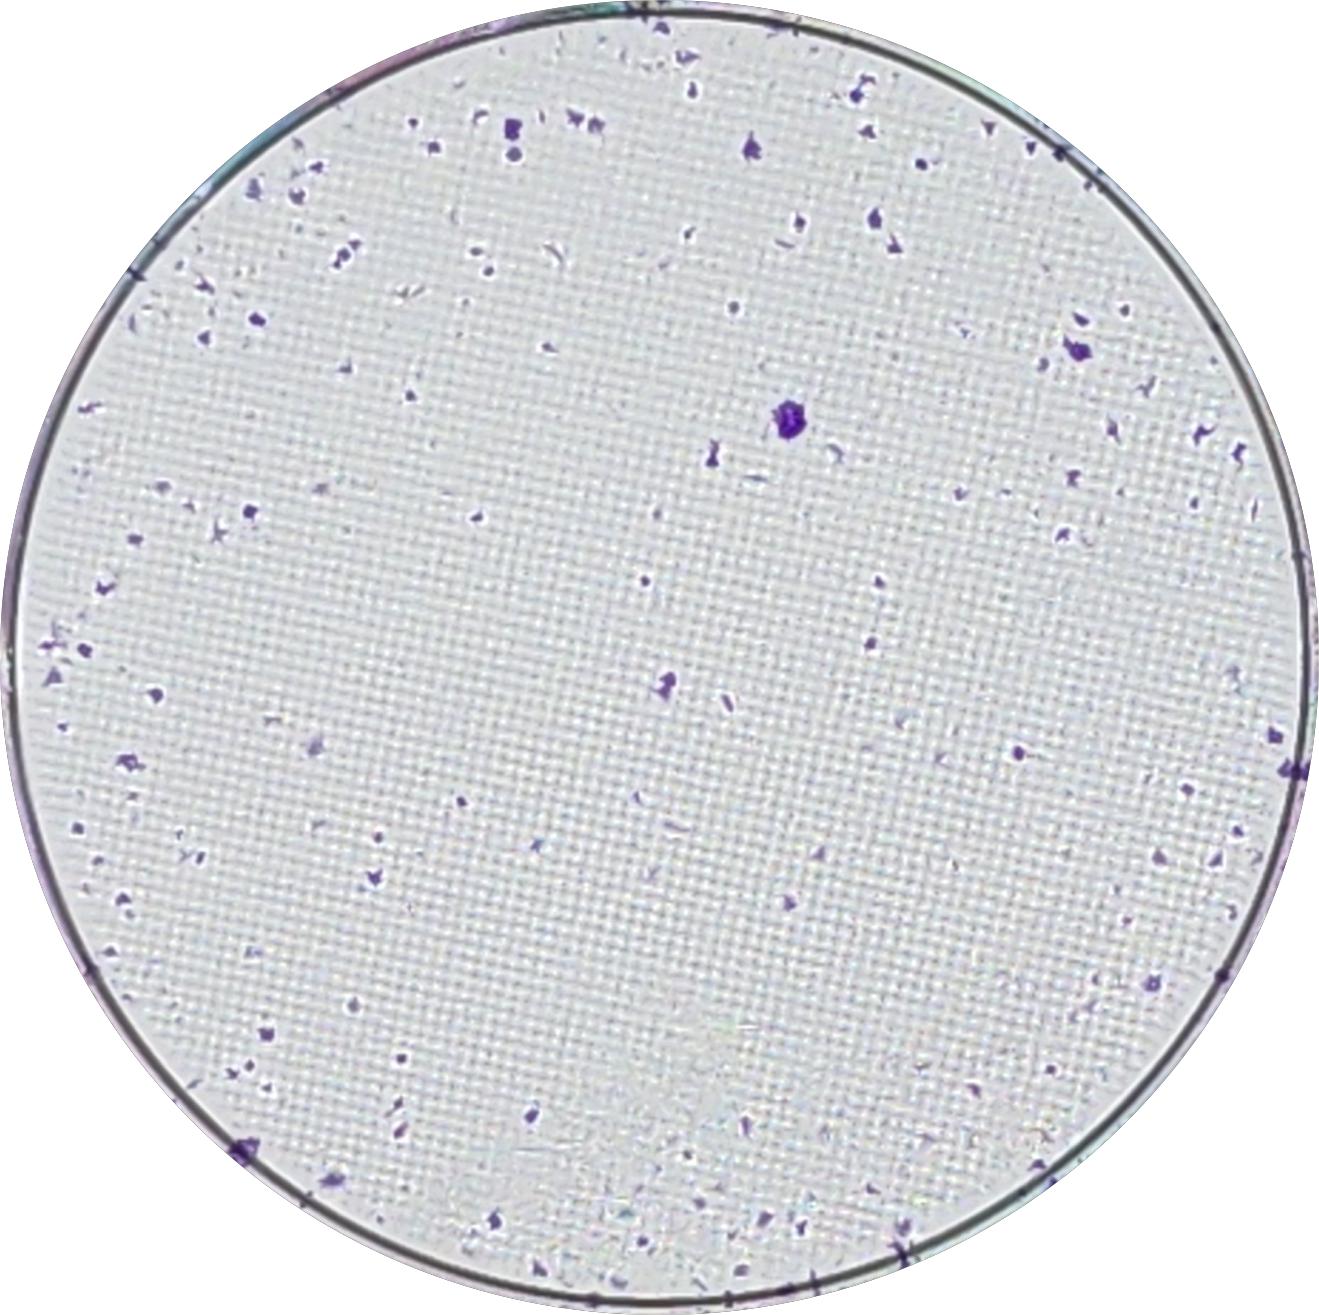

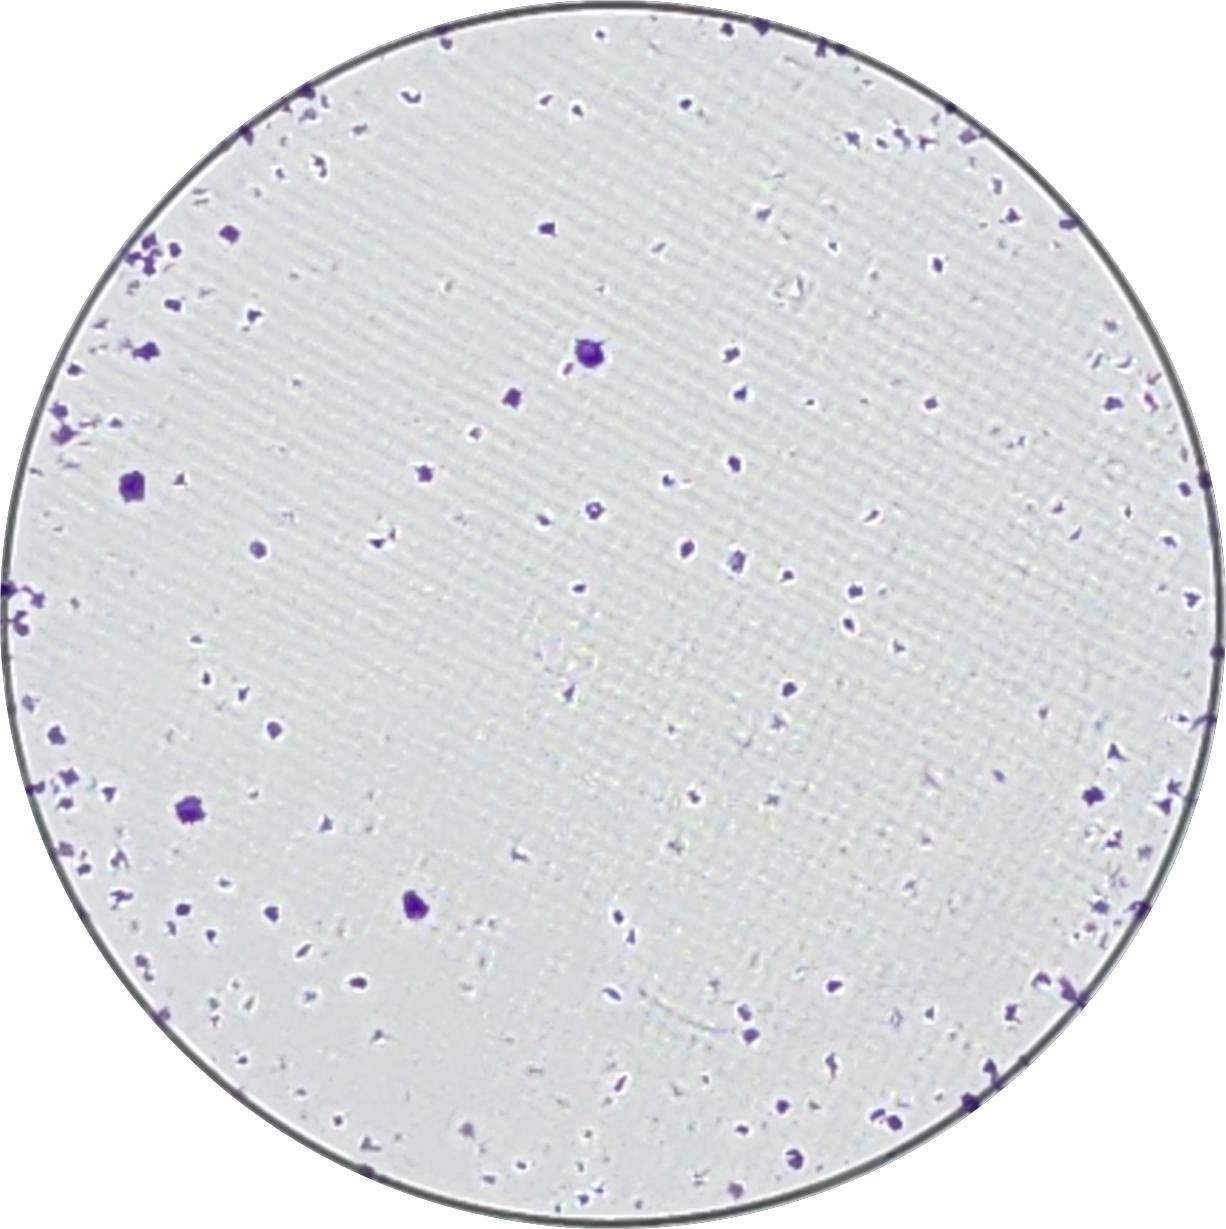

Supplement: Colony_Formation.zip [file A549.doc]

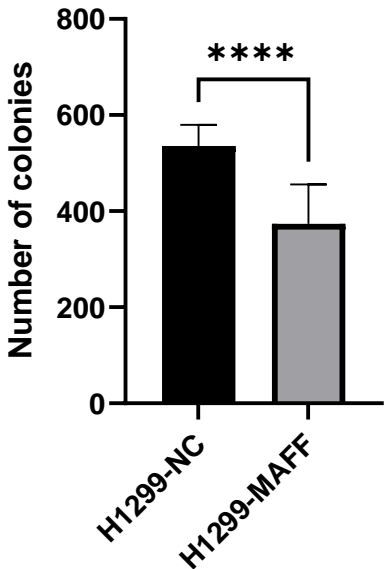

Supplement: Colony_Formation.zip [file H1299.pdf › Colony Formation/H1299.pdf]

**Relative nuclear fluorescence  
expression levels of YAP1/DAPI**

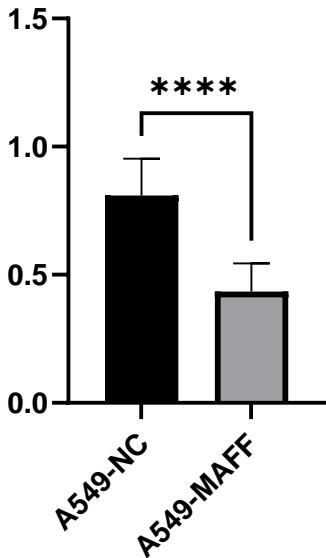

Supplement: IF.zip [file A549.pdf › IF/A549.pdf]

Relative nuclear fluorescence  
expression levels of YAP1/DAPI

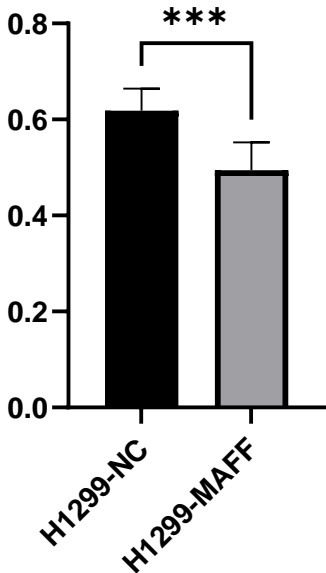

Supplement: IF.zip [file H1299.pdf › IF/H1299.pdf]

Repeat 1 A549-NC


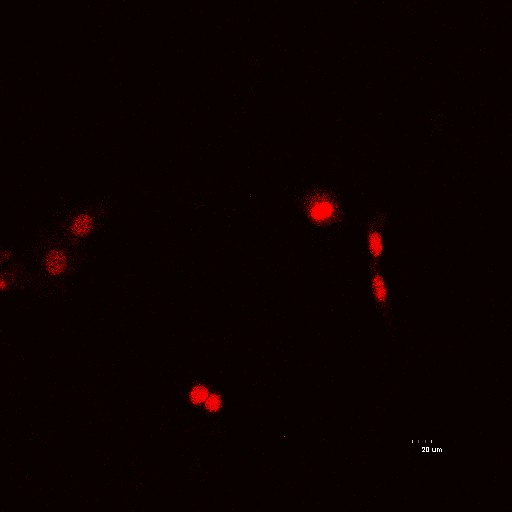

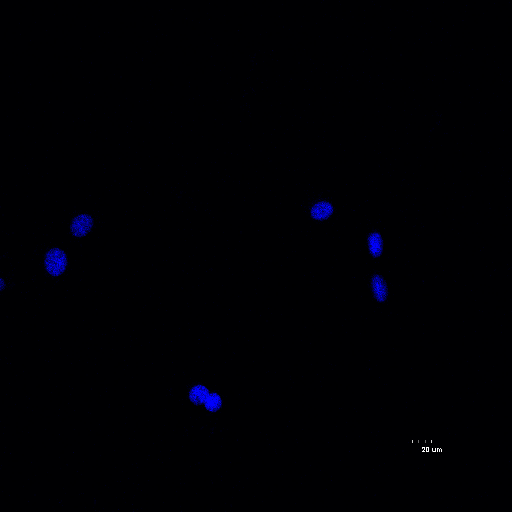

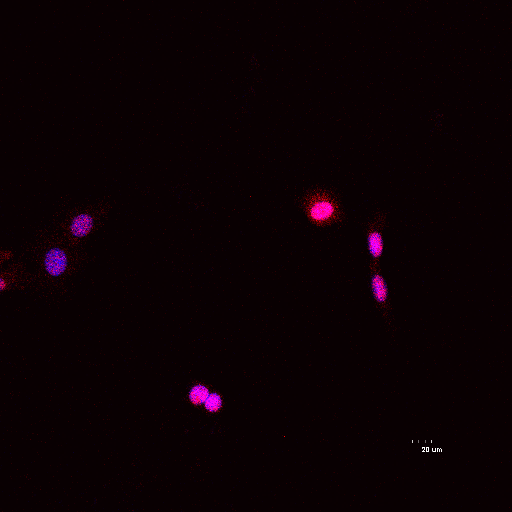


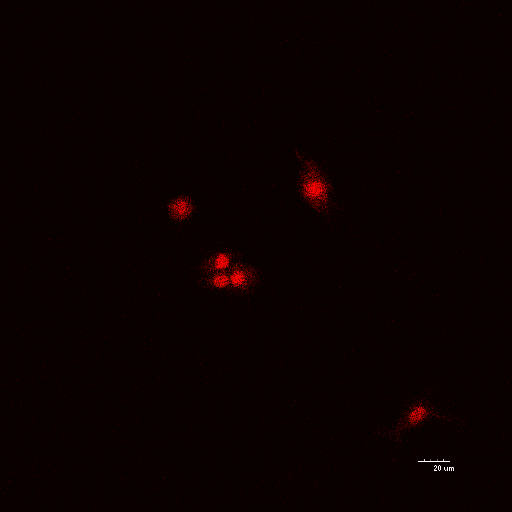

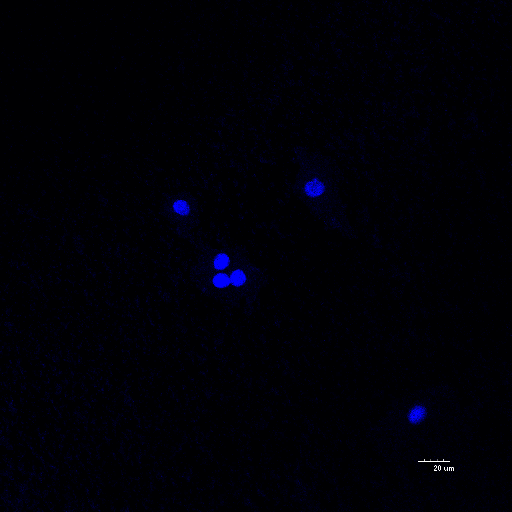

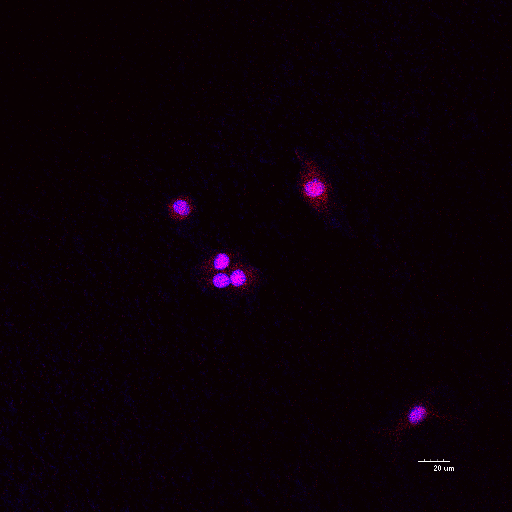

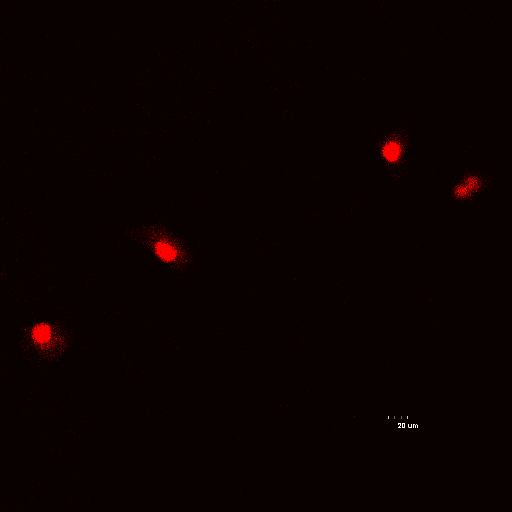

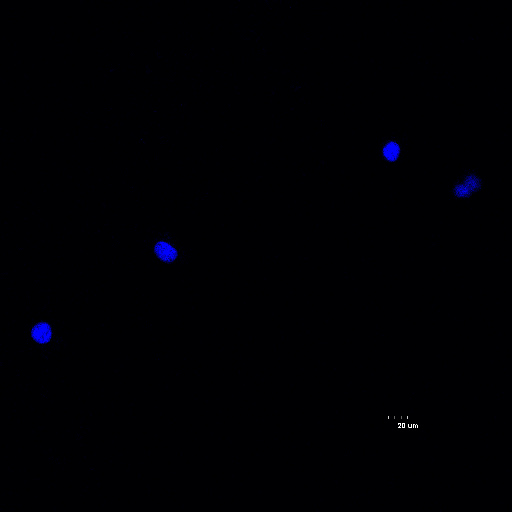

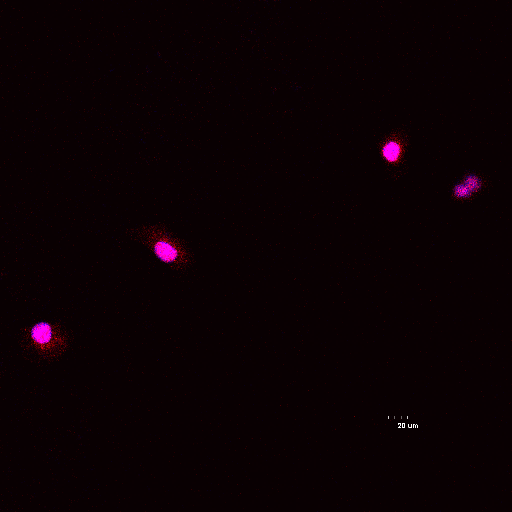


Repeat 1 A549-MAFF


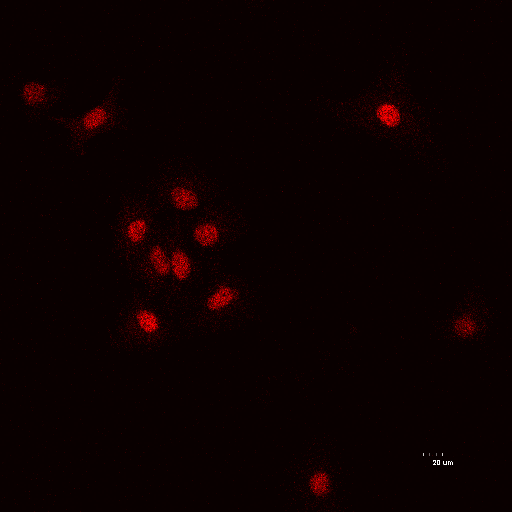

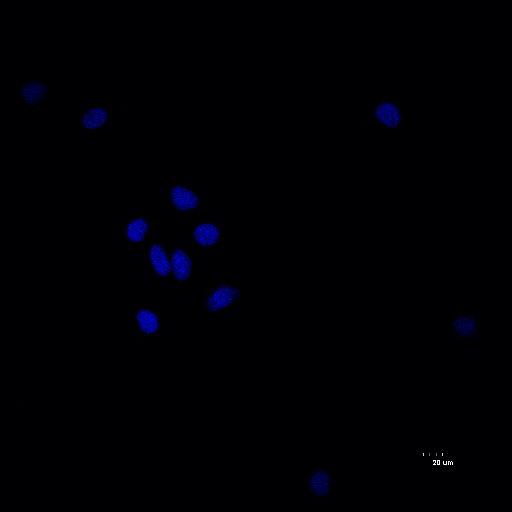

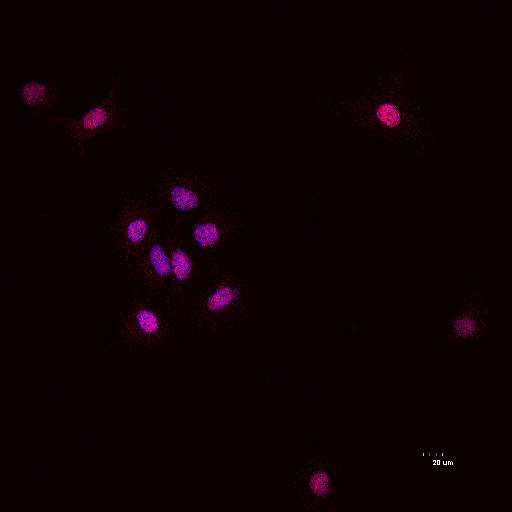

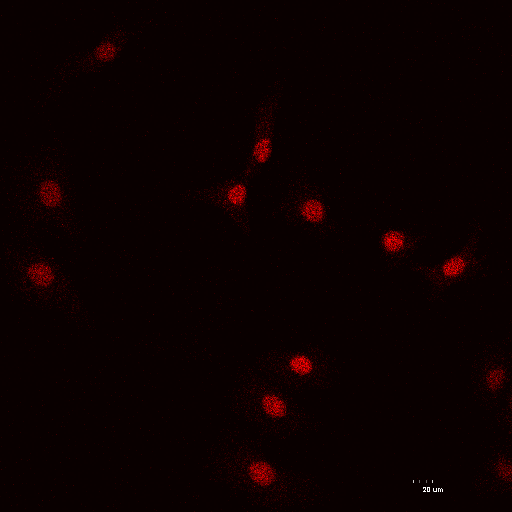

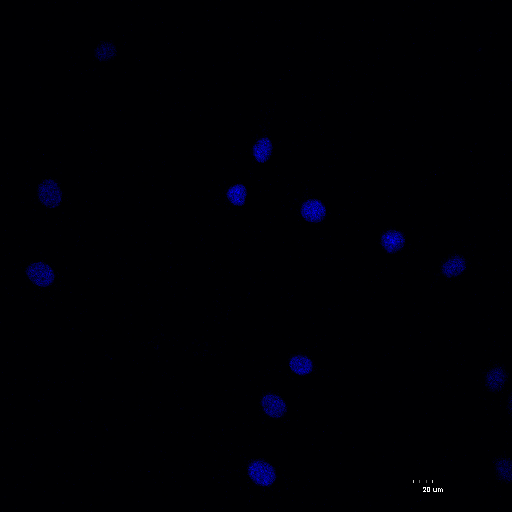

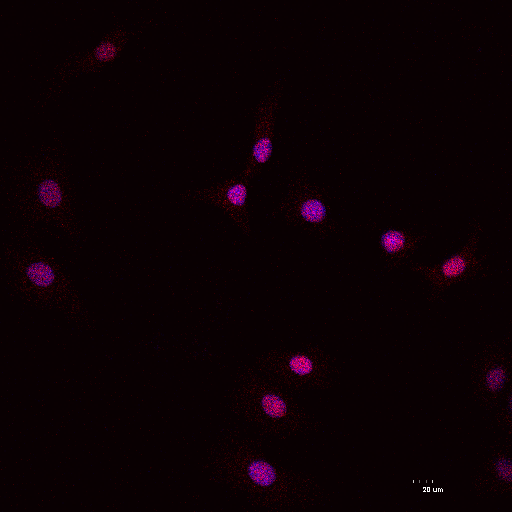

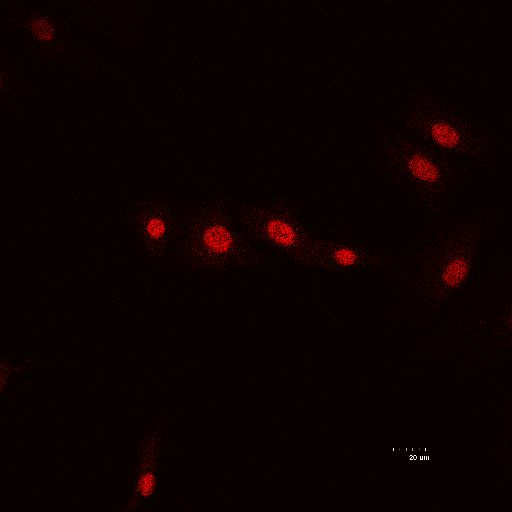

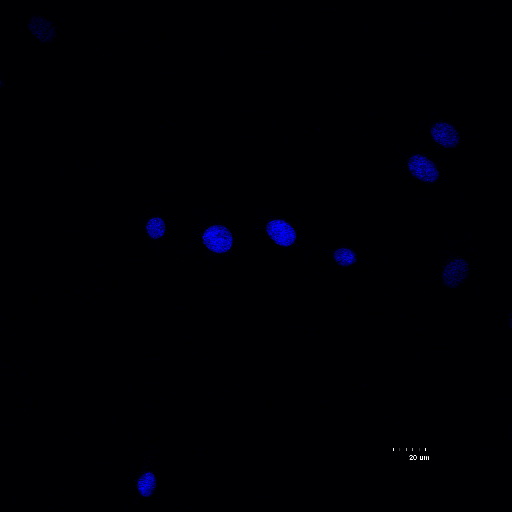

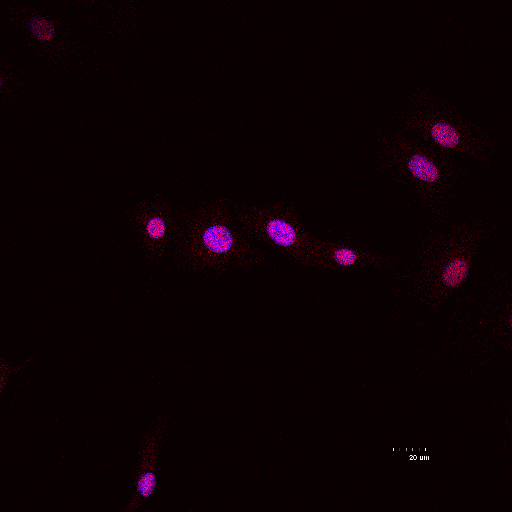


Repeat 2 A549-NC


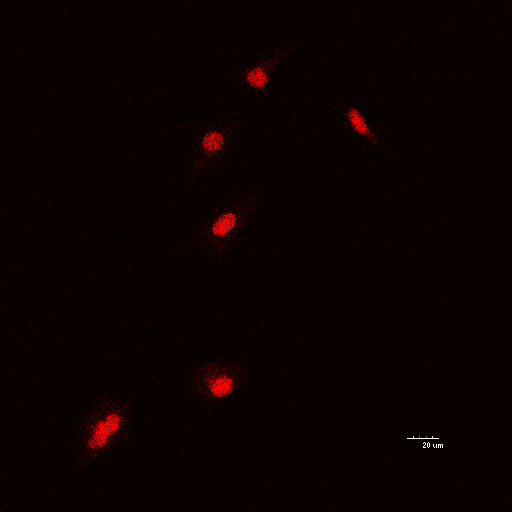

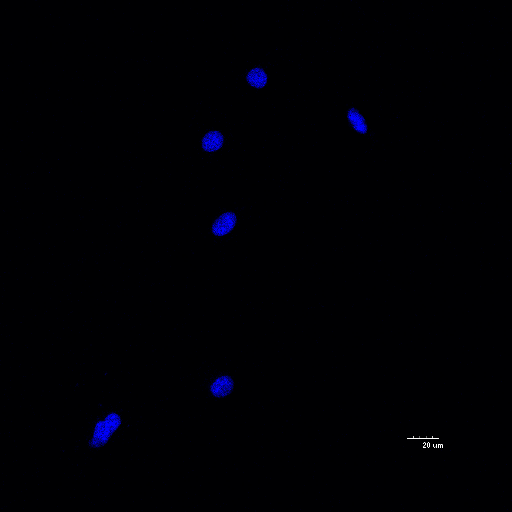

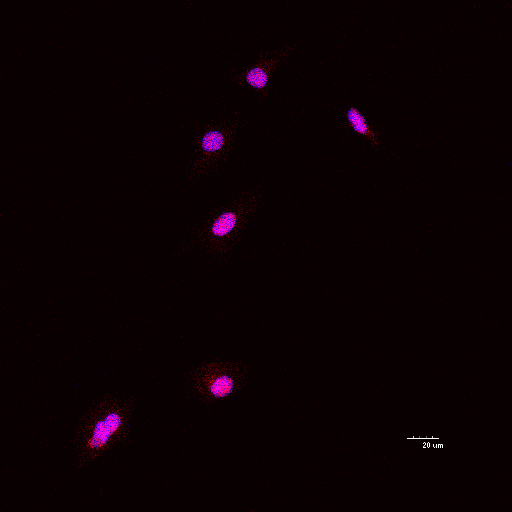

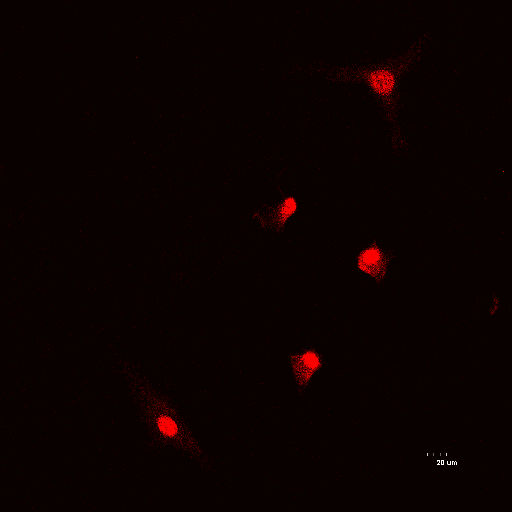

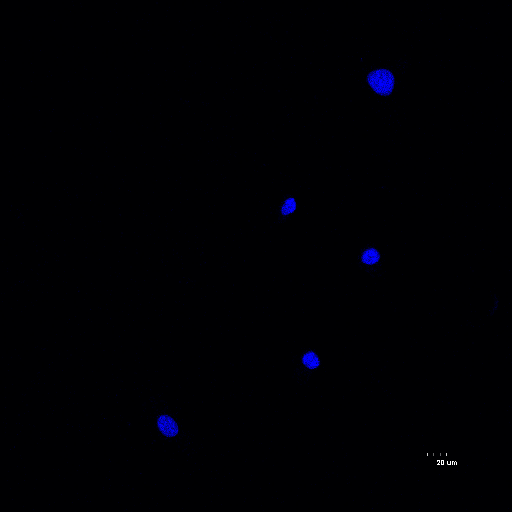

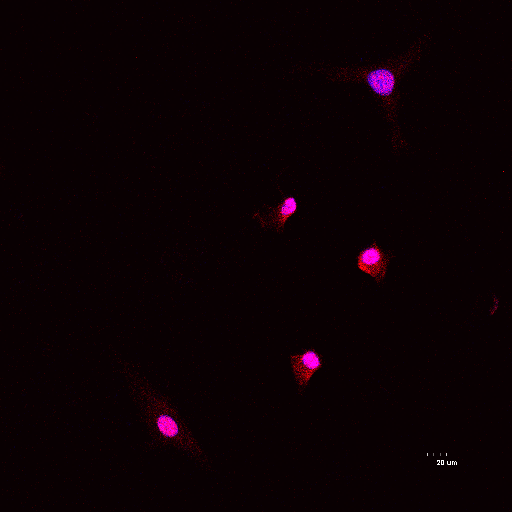

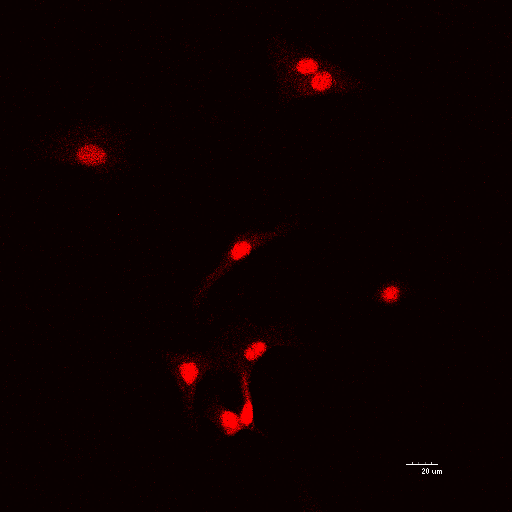

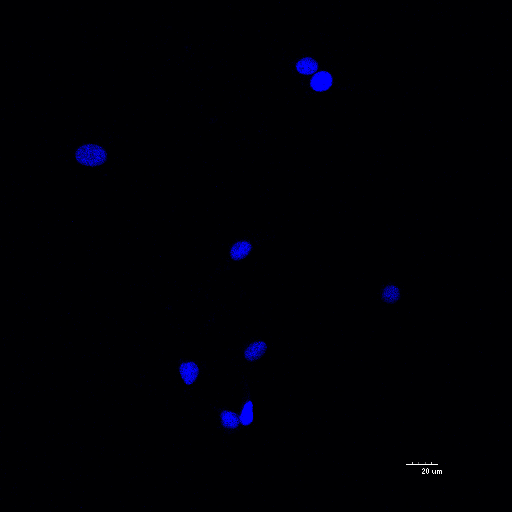

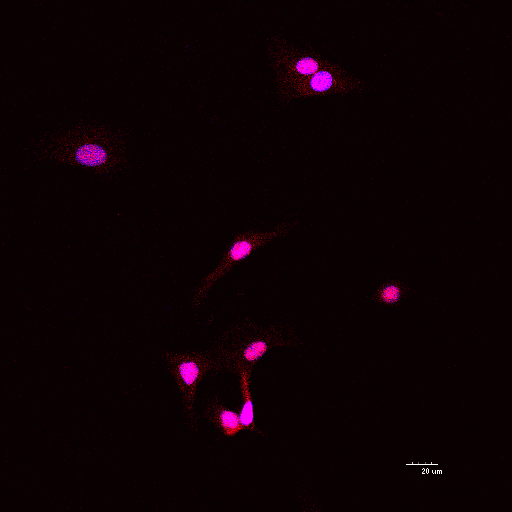


Repeat 2 A549-MAFF


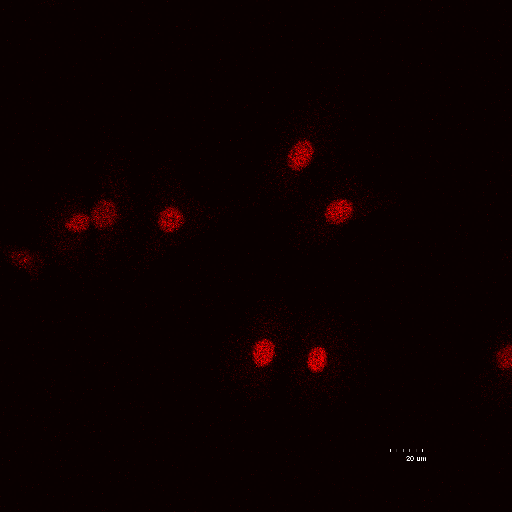

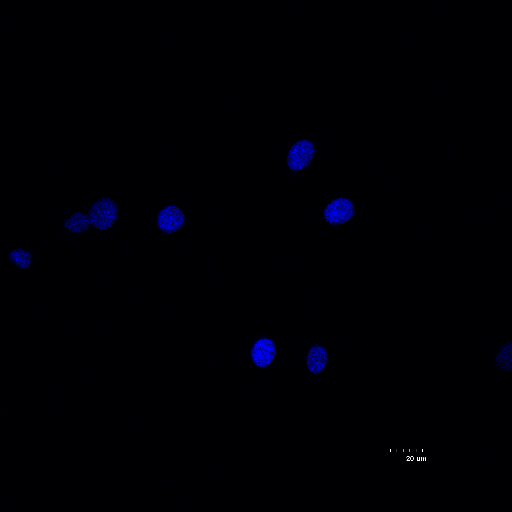

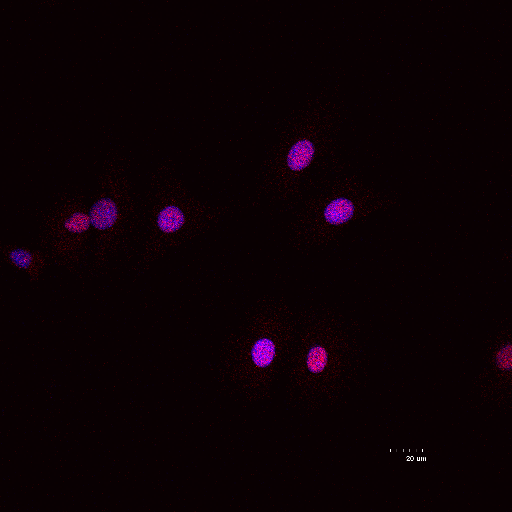

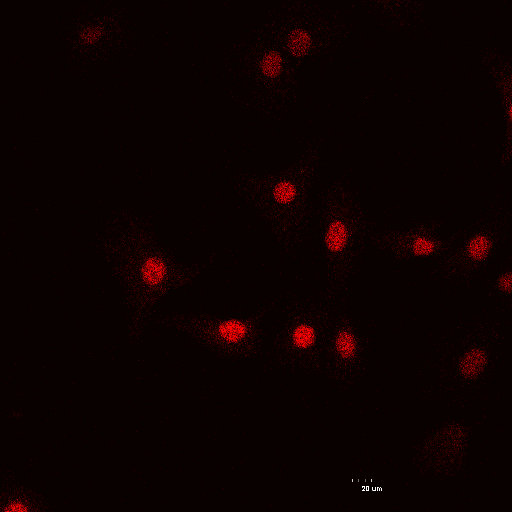

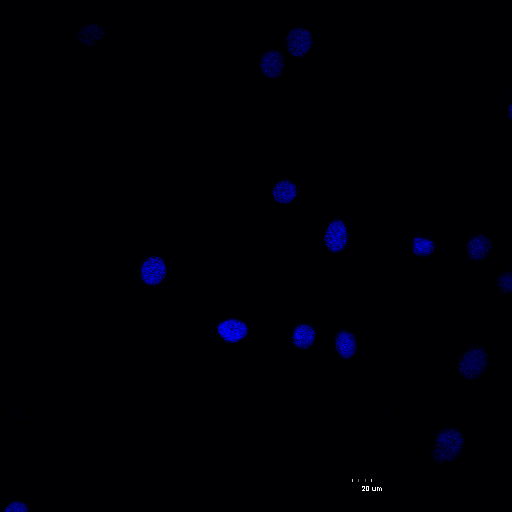

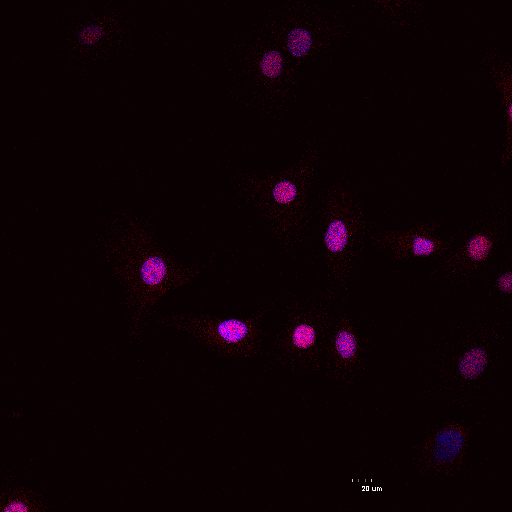


Repeat 3 A549-NC


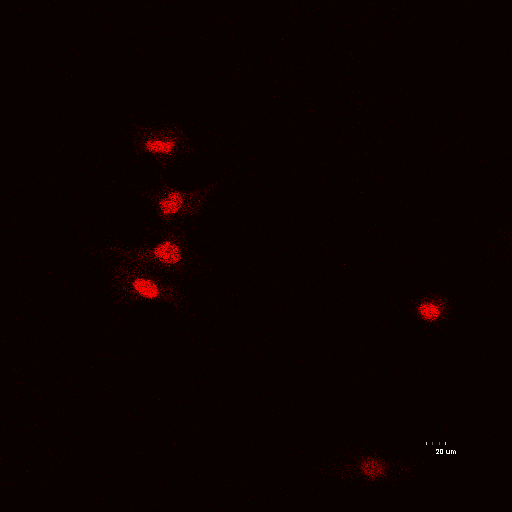

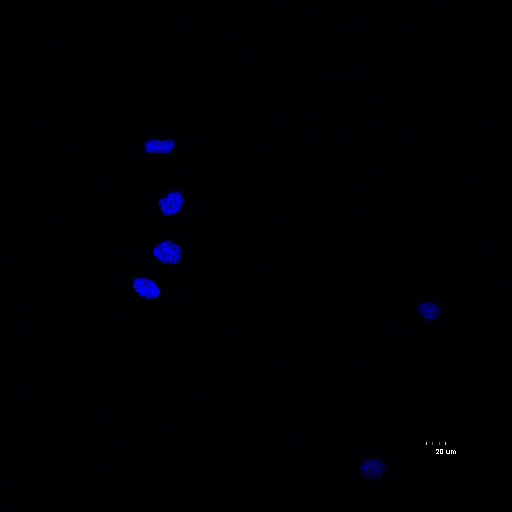

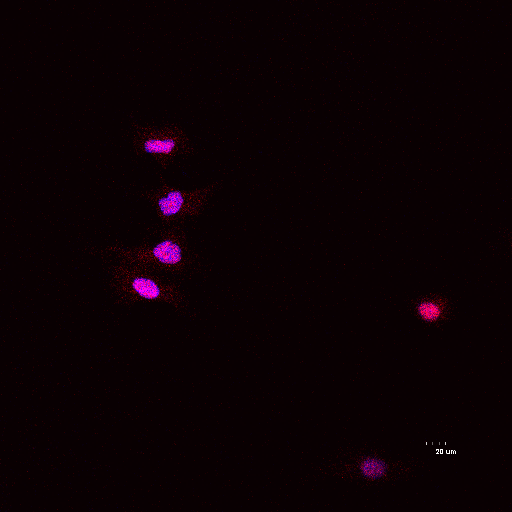

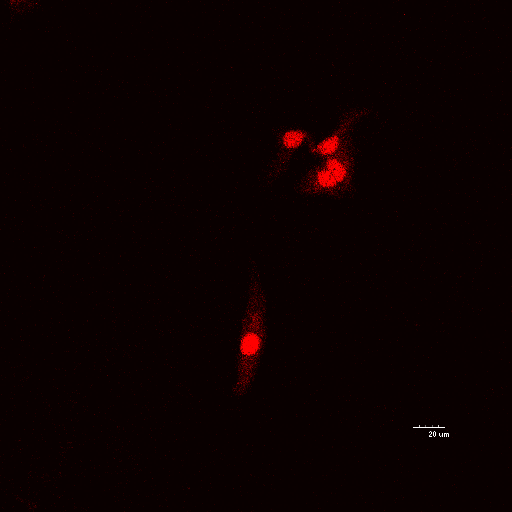

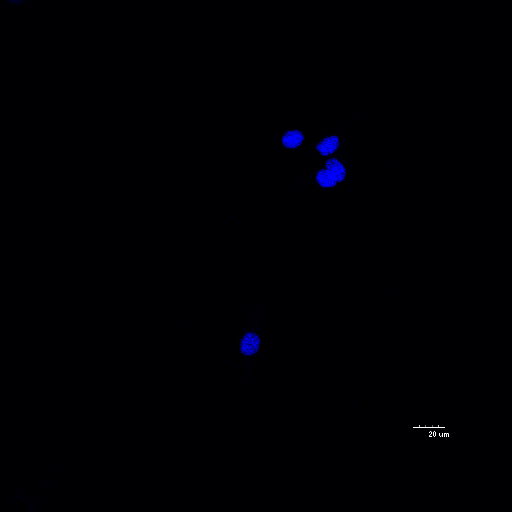

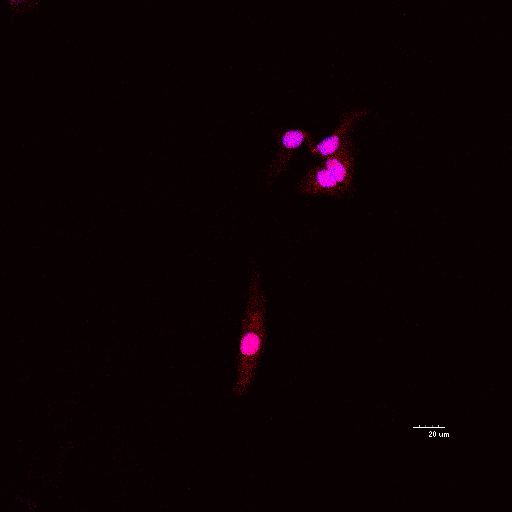

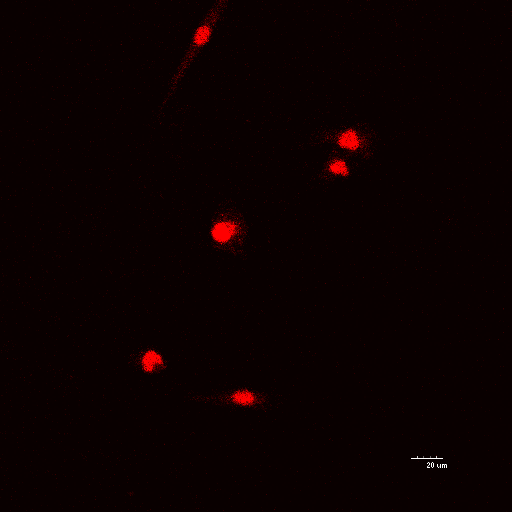

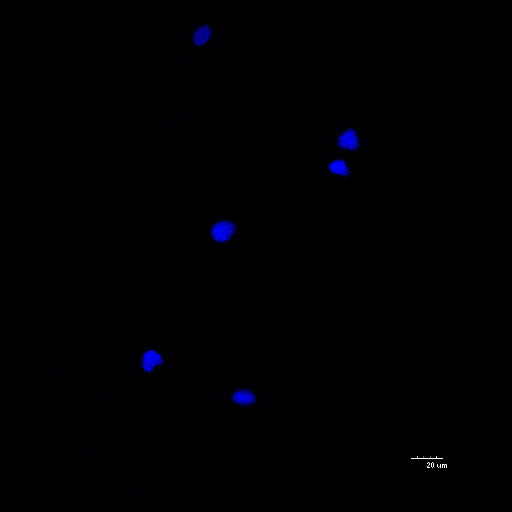

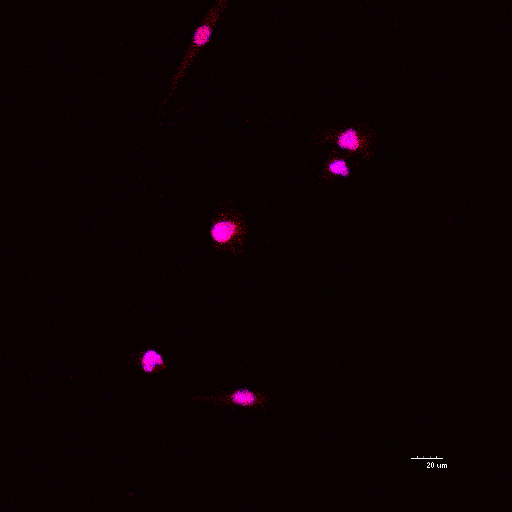


Repeat 3 A549-MAFF


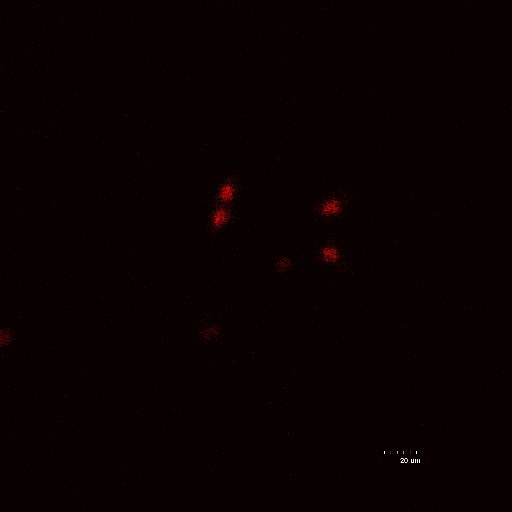

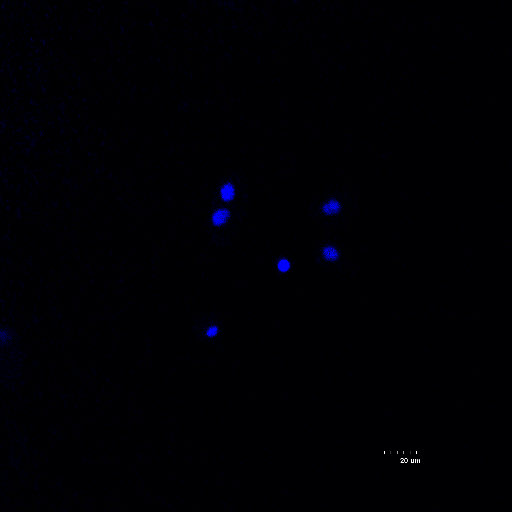

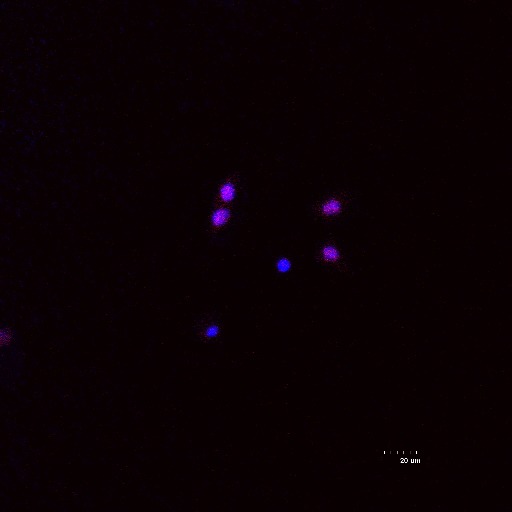

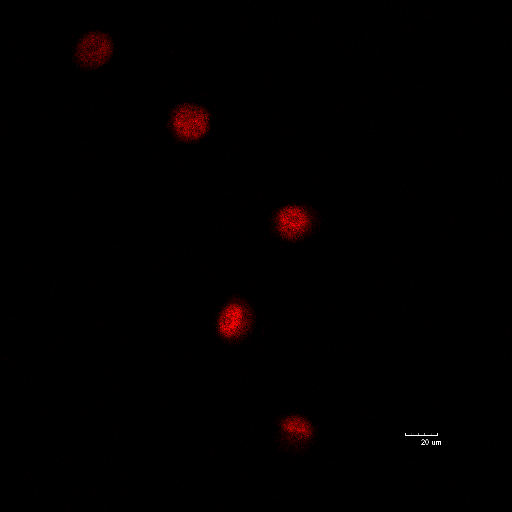

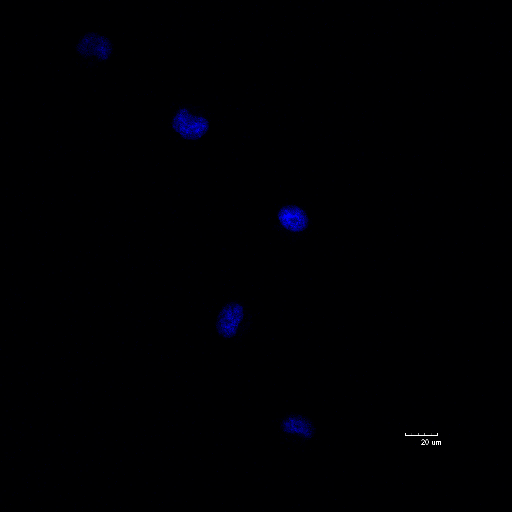

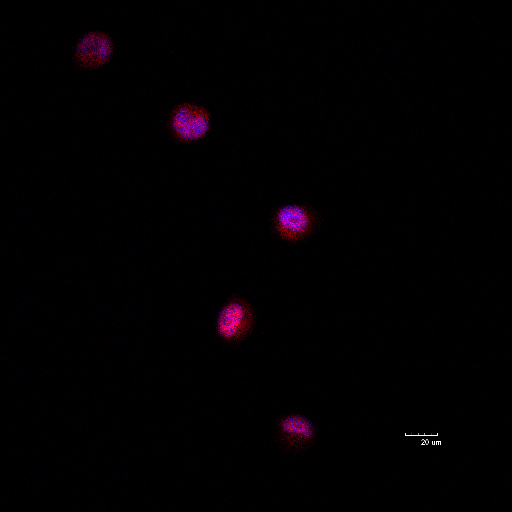


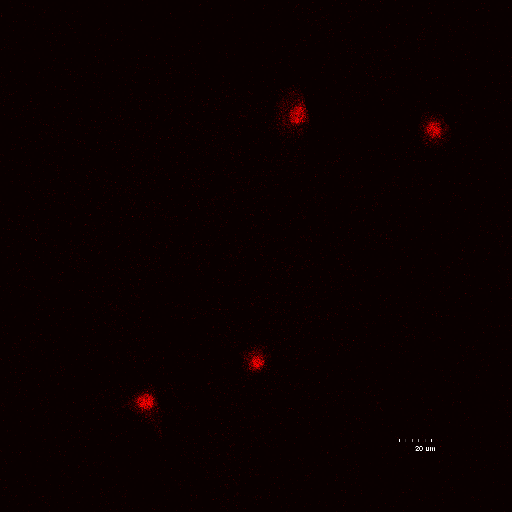

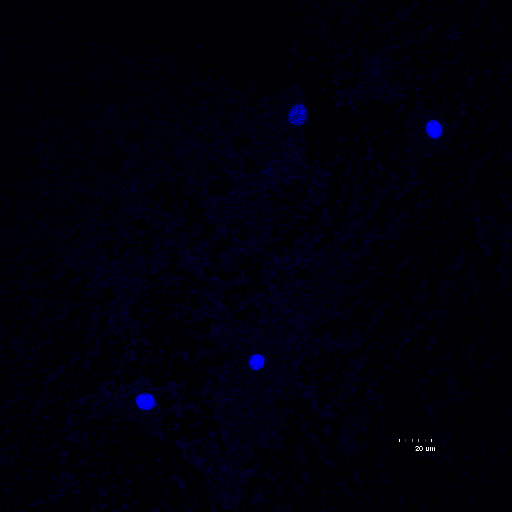

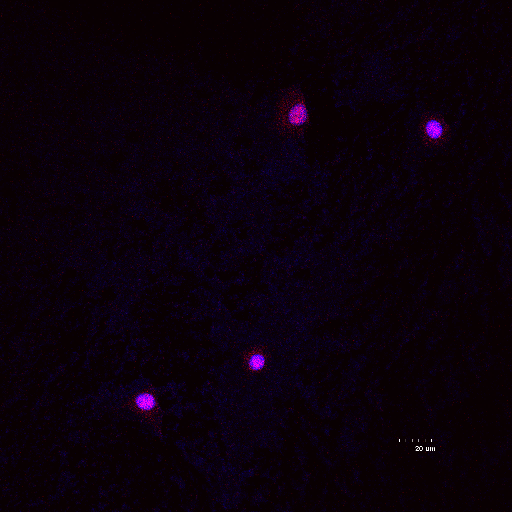

Supplement: IF.zip [file A549.doc]

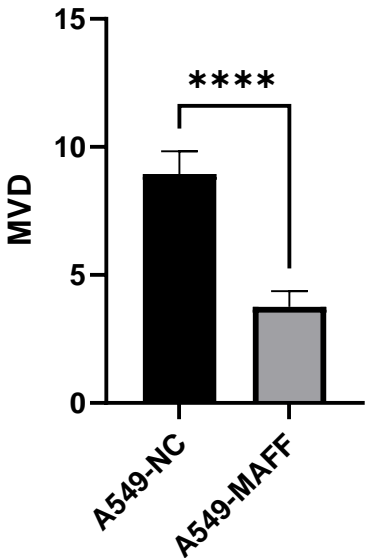

Supplement: In_Vitro_Experiment.zip [file MVD.pdf › In Vitro Experiment/MVD.pdf]

Patient 1

Tumor tissue


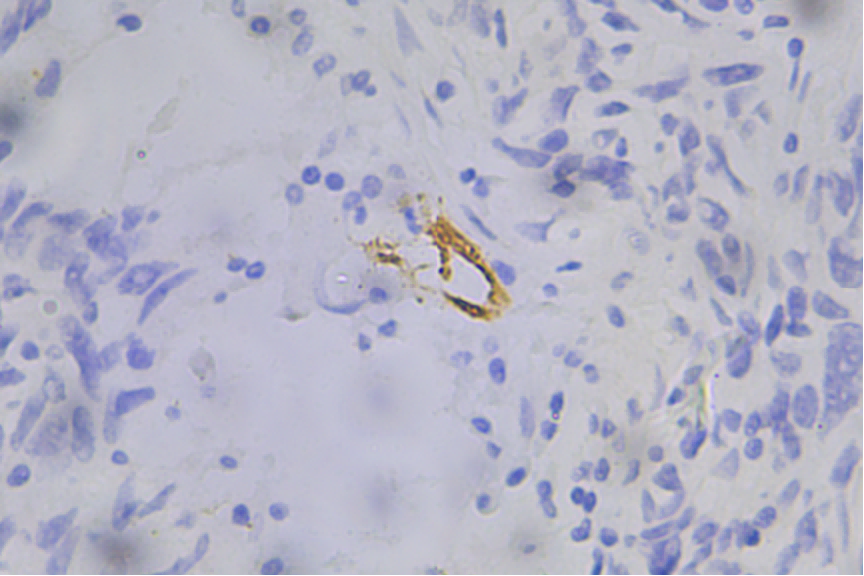


Patient 2

Tumor tissue


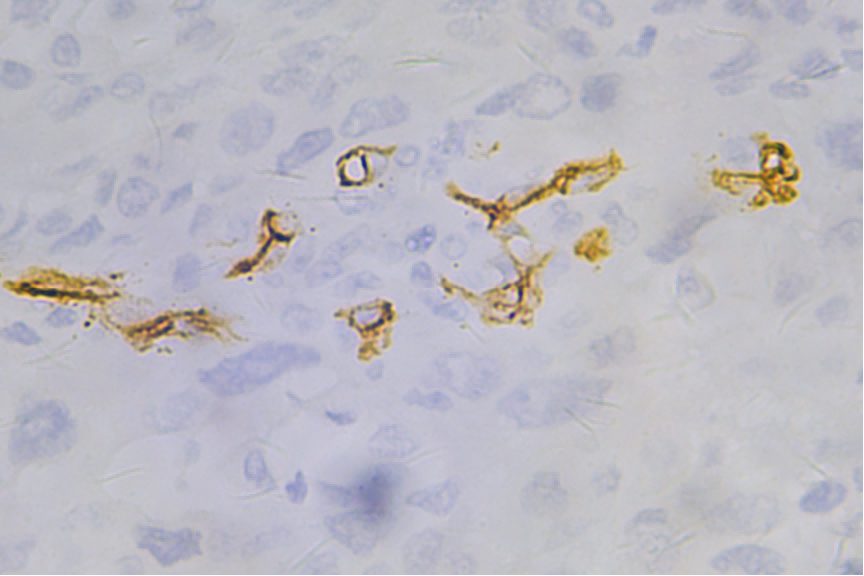

Supplement: IHC.zip [file CD34.doc]

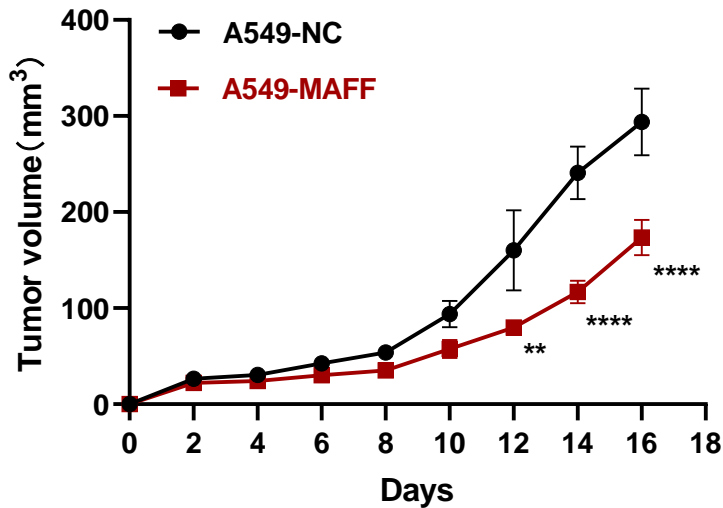

Supplement: In_Vitro_Experiment.zip [file Volume.pdf › In Vitro Experiment/Volume.pdf]

Relative protein expression levels of  
CTGF/ $\beta$ -actin

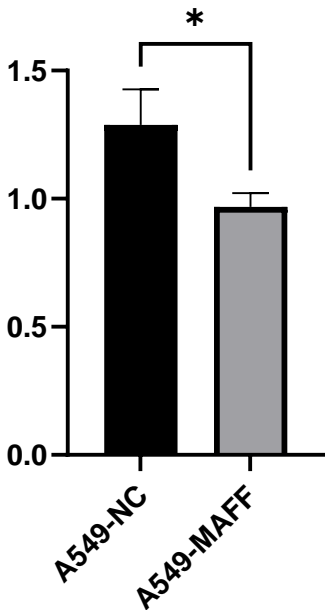

Supplement: In_Vitro_Experiment.zip [file CTGF.pdf › In Vitro Experiment/WB/CTGF.pdf]

Patient 1

Normal tissue


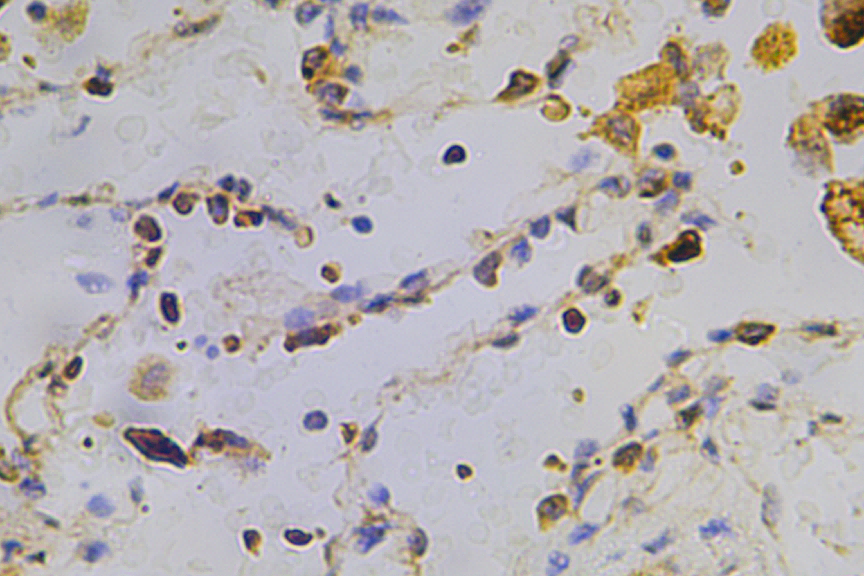


Tumor tissue


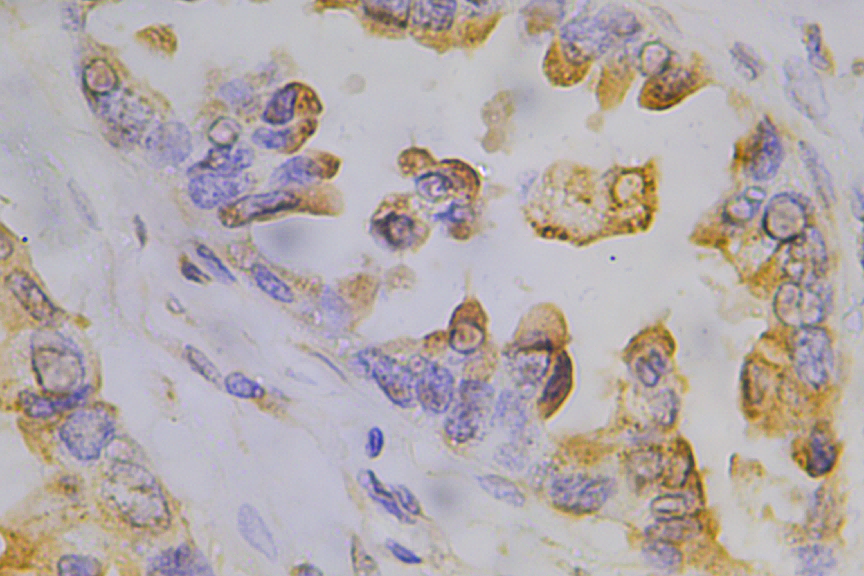


Patient

Normal tissue


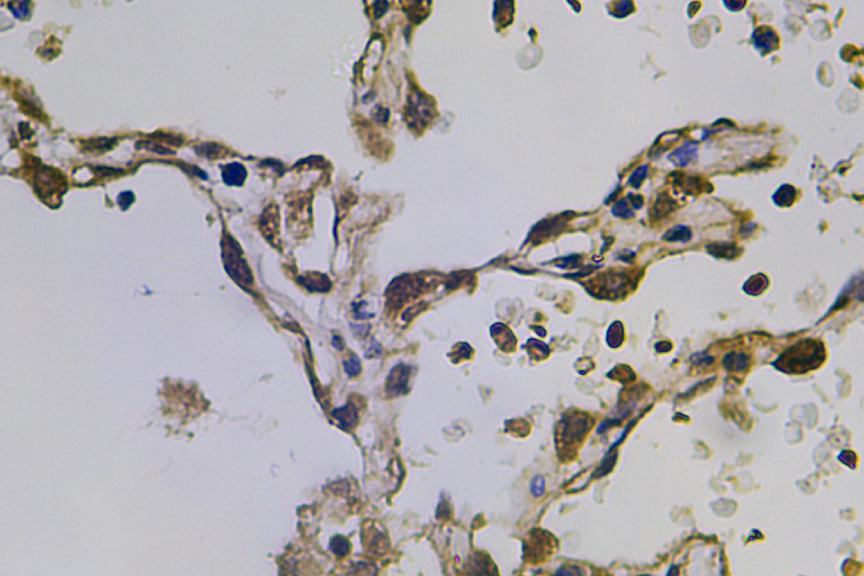


Tumor tissue


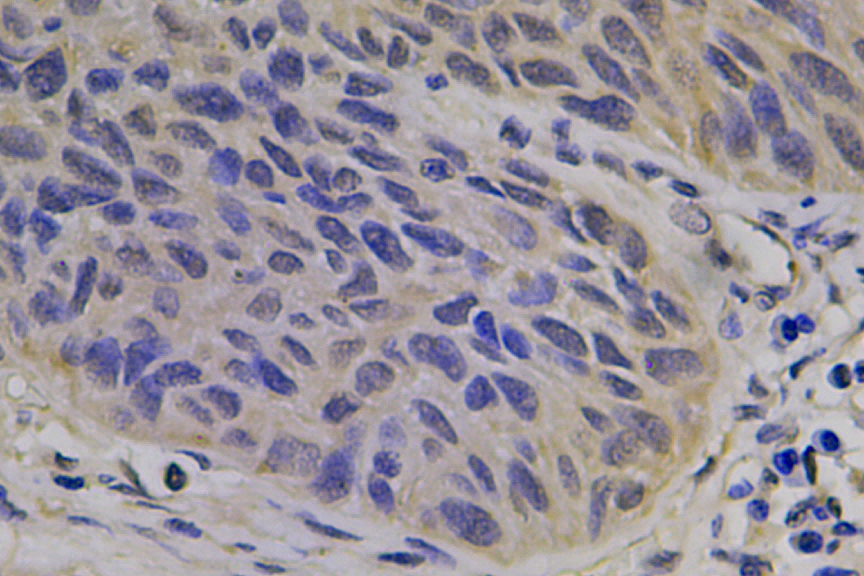

Supplement: IHC.zip [file MAFF.doc]

Relative protein expression levels of  
MAFF/ $\beta$ -actin

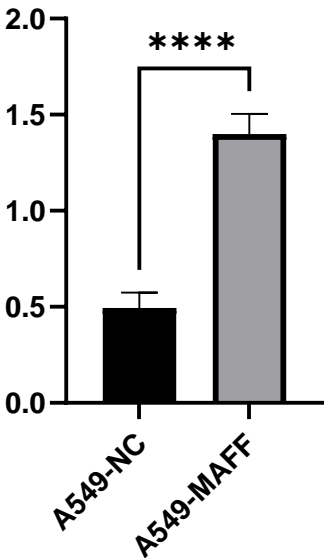

Supplement: In_Vitro_Experiment.zip [file MAFF.pdf › In Vitro Experiment/WB/MAFF.pdf]

Relative protein expression levels of  
VEGFA/ $\beta$ -actin

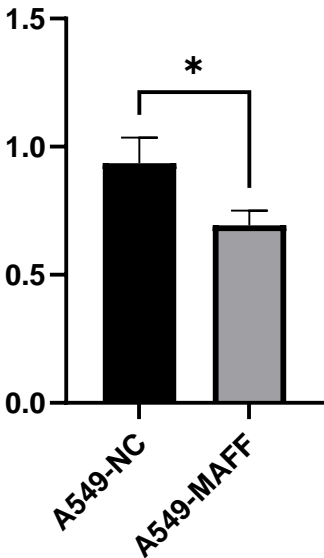

Supplement: In_Vitro_Experiment.zip [file VEGFA.pdf › In Vitro Experiment/WB/VEGFA.pdf]

MAFF

A549-NC


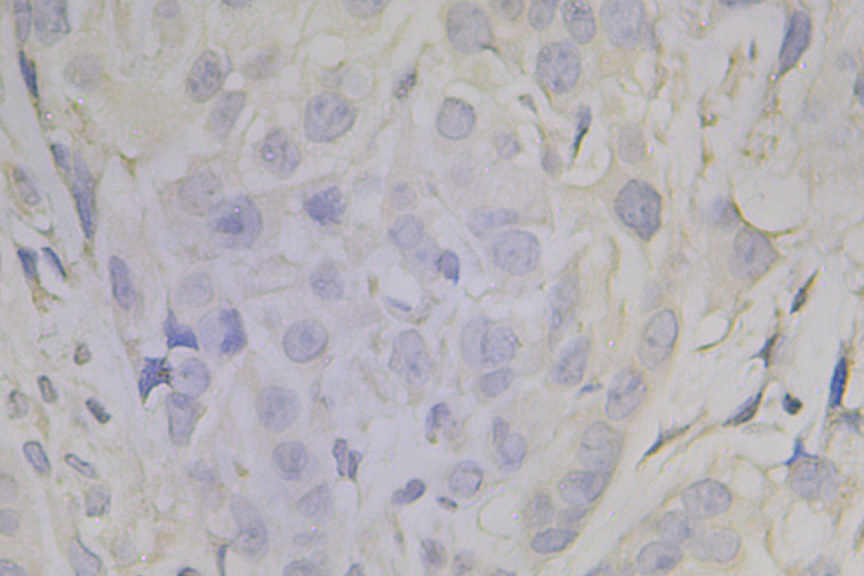


A549-MAFF


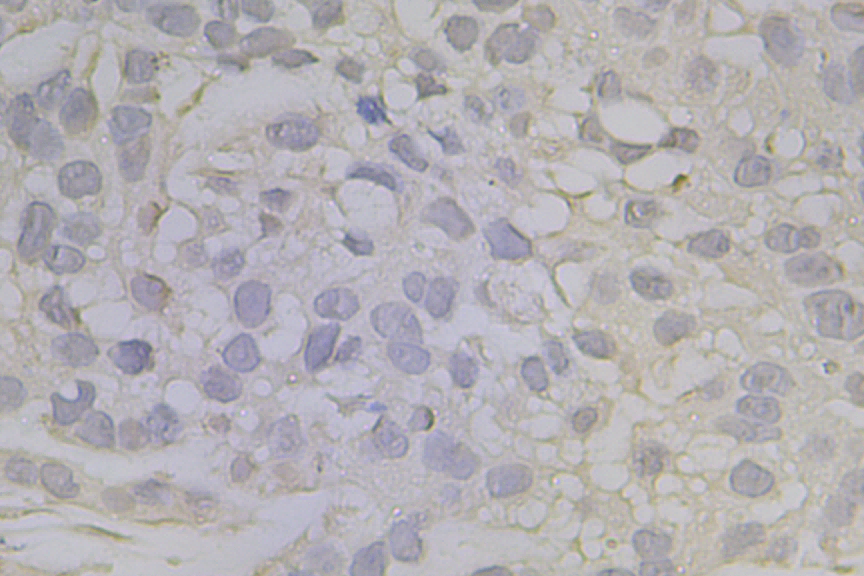


CD34

A549-NC


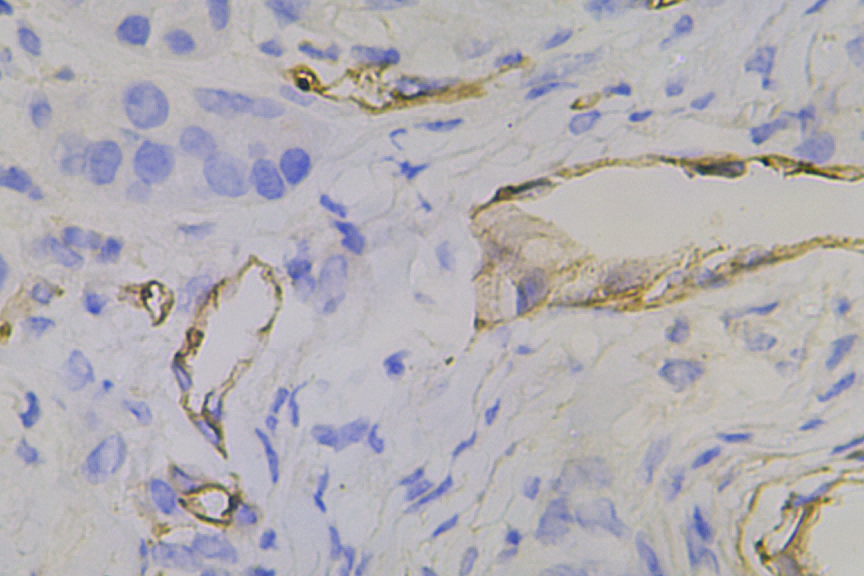

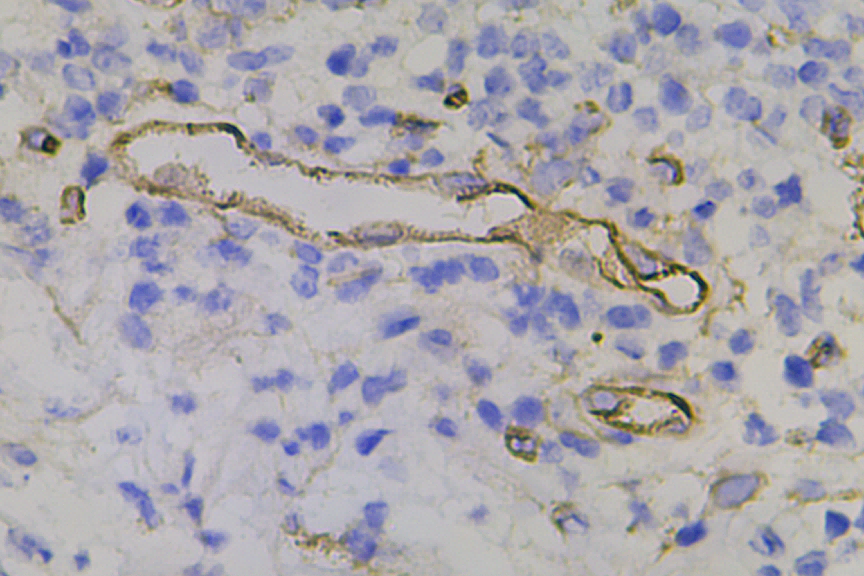

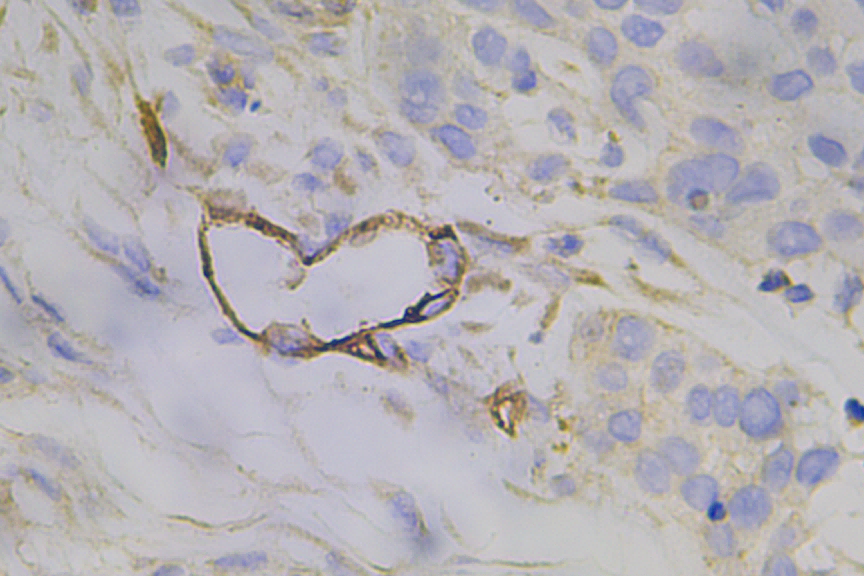


A549-MAFF


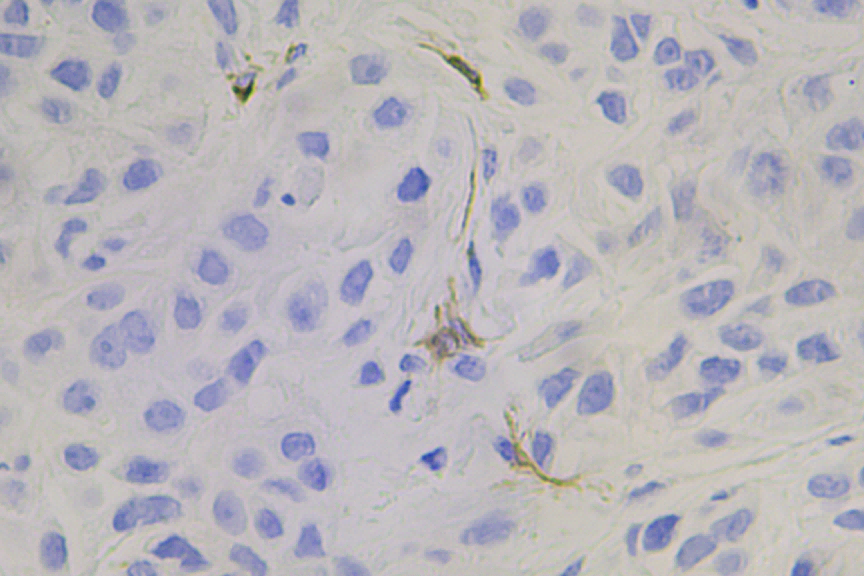


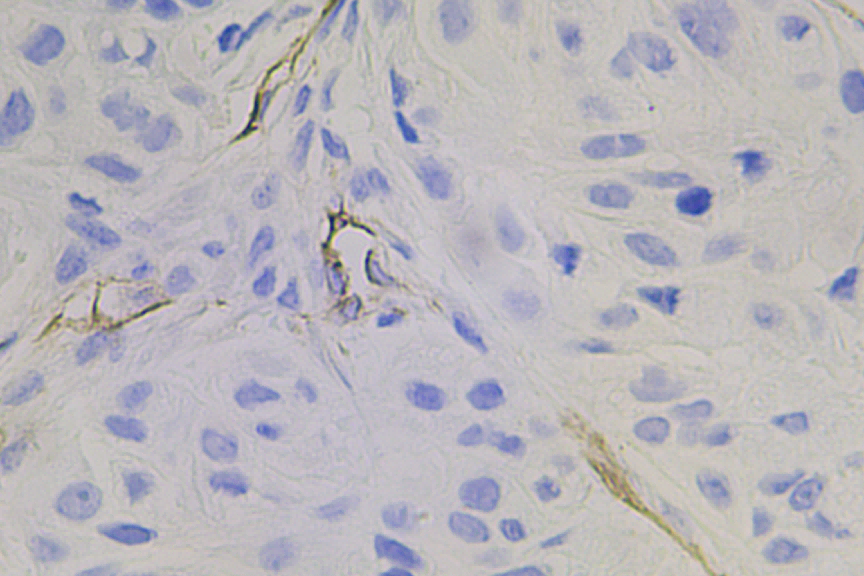

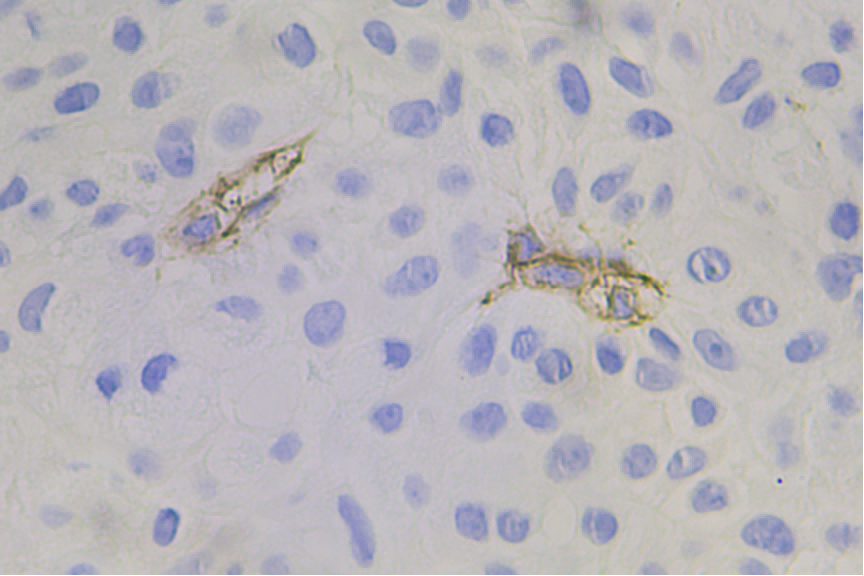

Supplement: In_Vitro_Experiment.zip [file IHC.doc]

Relative protein expression levels of  
YAP1/ $\beta$ -actin

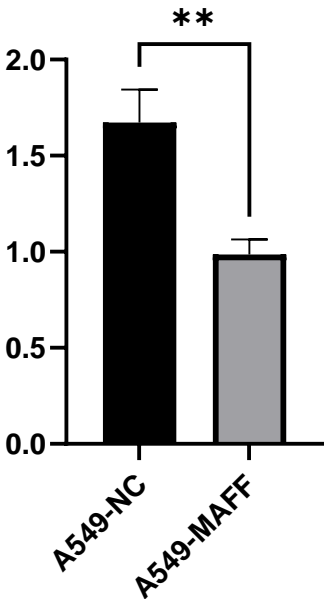

Supplement: In_Vitro_Experiment.zip [file YAP1.pdf › In Vitro Experiment/WB/YAP1.pdf]

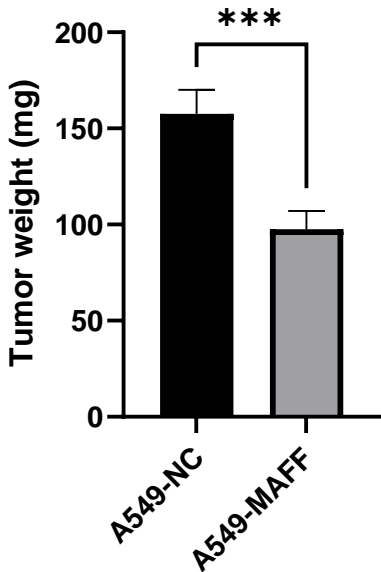

Supplement: In_Vitro_Experiment.zip [file Weight.pdf › In Vitro Experiment/Weight.pdf]

Repeat 1

β-actin


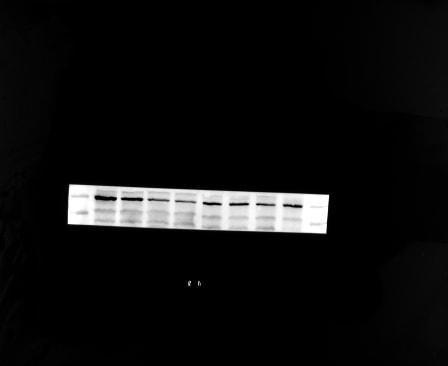


CTGF


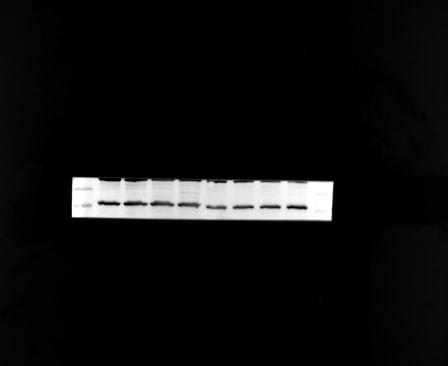


Repeat 2

β-actin


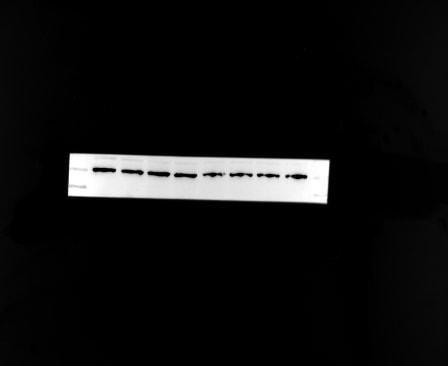


CTGF


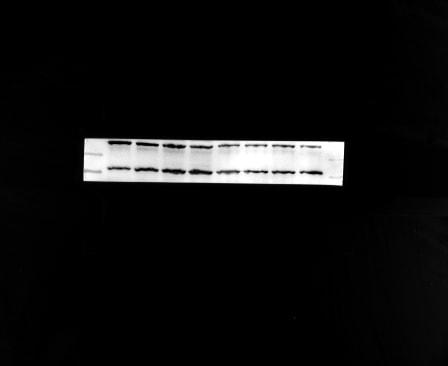


Repeat 3

β-actin


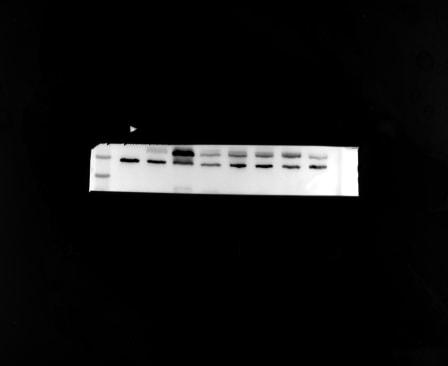


CTGF


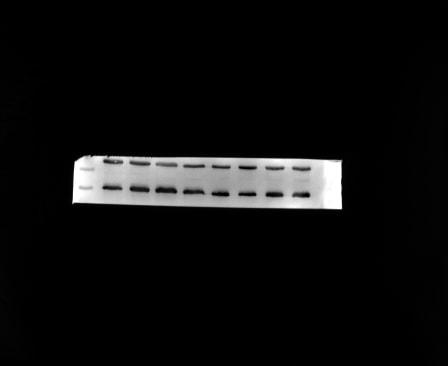

Supplement: In_Vitro_Experiment.zip [file CTGF.docx]

Relative cell migration number

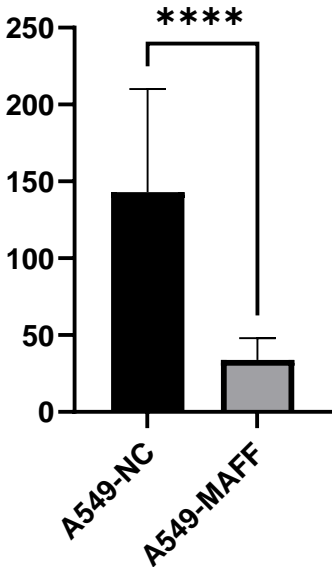

Supplement: Transwell.zip [file A549.pdf › Transwell/A549.pdf]

Repeat 1

β-actin


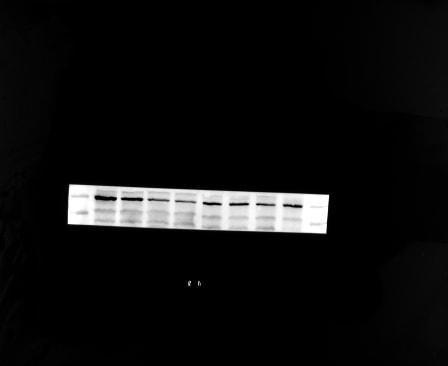


MAFF


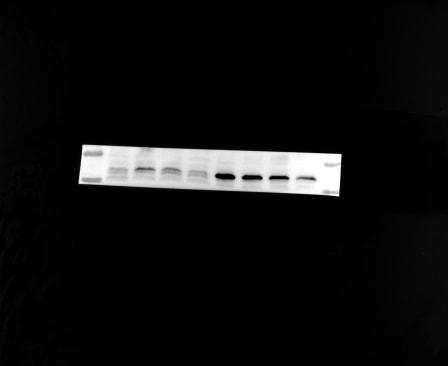


Repeat 2

β-actin


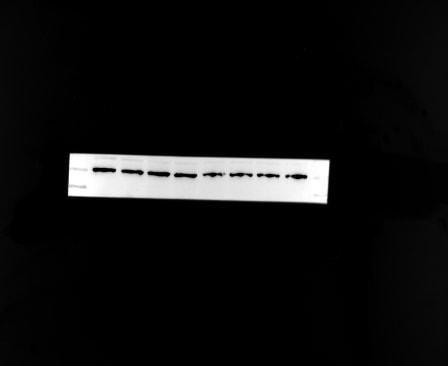


MAFF


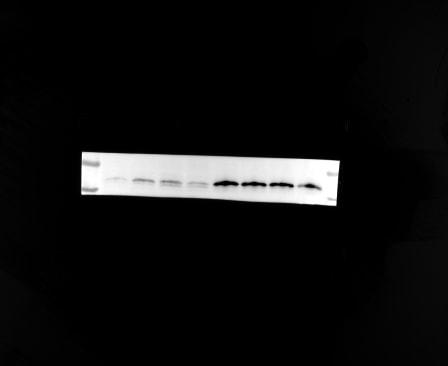


Repeat 3

β-actin


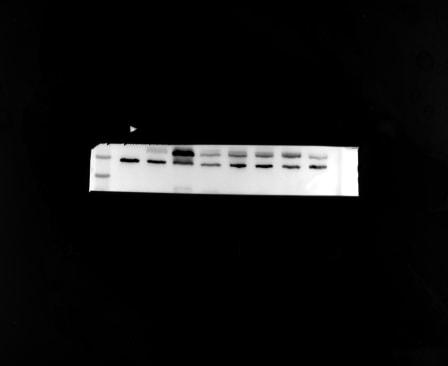


MAFF


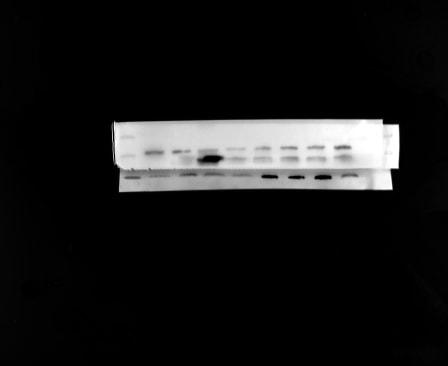

Supplement: In_Vitro_Experiment.zip [file MAFF.docx]

Relative cell migration number

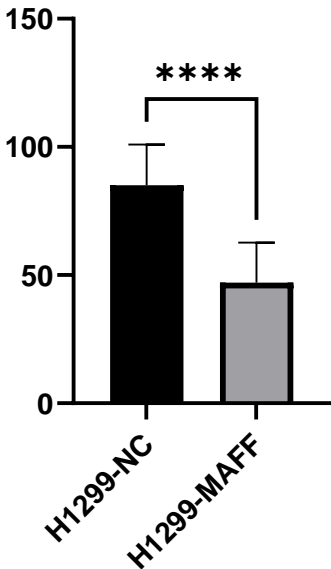

Supplement: Transwell.zip [file H1299.pdf › Transwell/H1299.pdf]

Repeat 1

β-actin


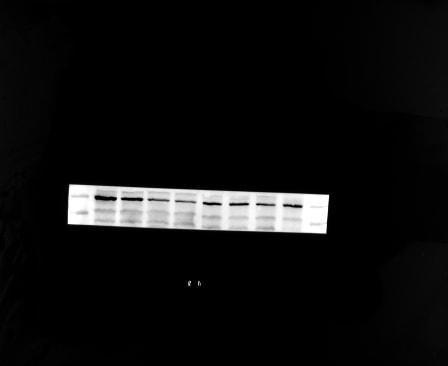


VEGFA


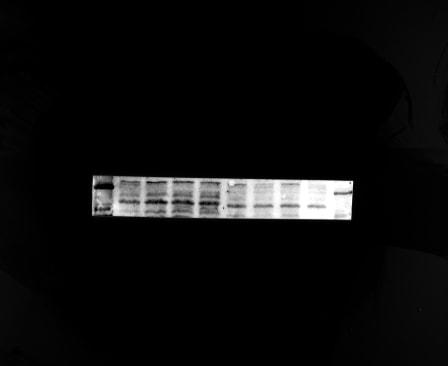


Repeat 2

β-actin


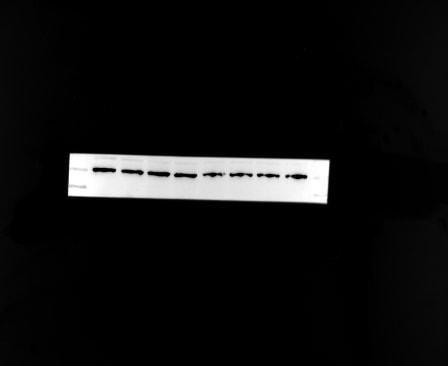


VEGFA


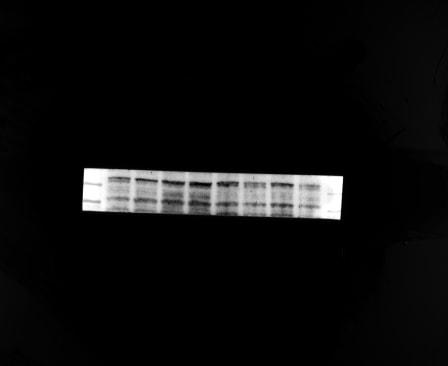


Repeat 3

β-actin


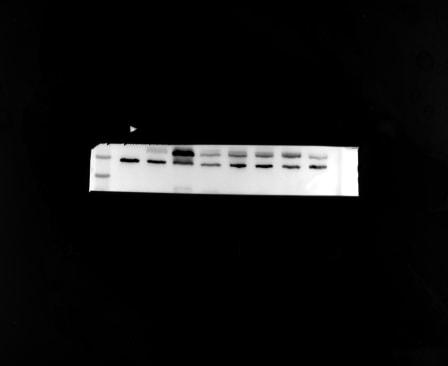


VEGFA


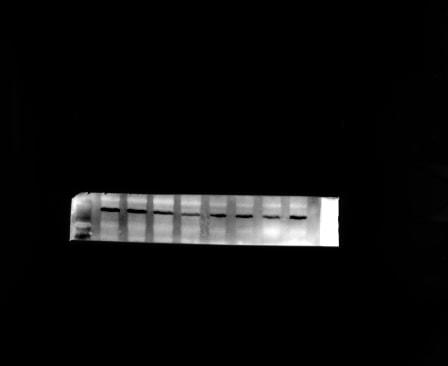

Supplement: In_Vitro_Experiment.zip [file VEGFA.docx]

Relative protein expression levels of

CTGF/ $\beta$ -actin

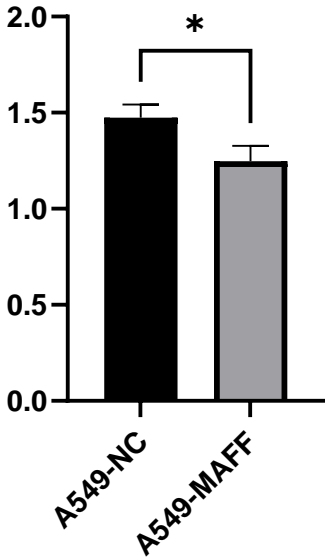

Supplement: WB.zip [file CTGF.pdf › WB/A549/CTGF.pdf]

Repeat 1

β-actin


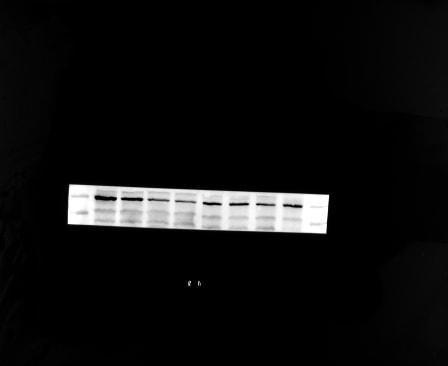


YAP1


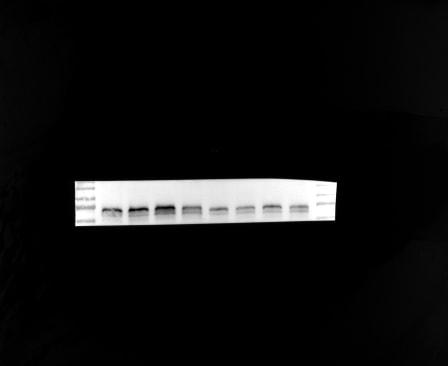


Repeat 2

β-actin


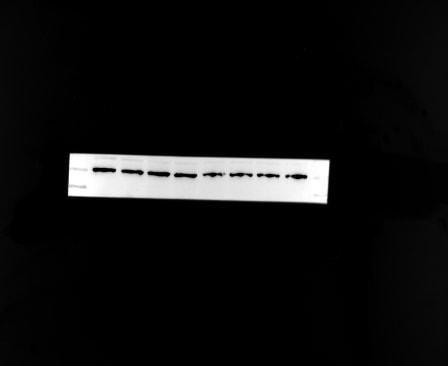


YAP1


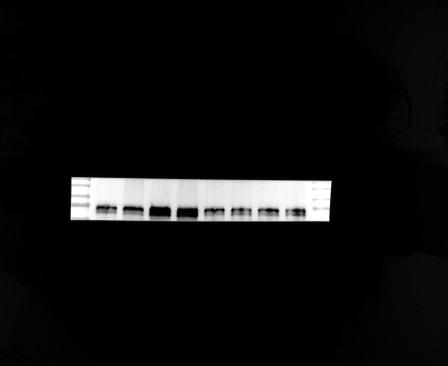


Repeat 3

β-actin


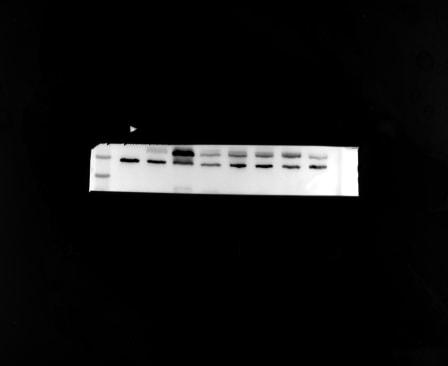


YAP1


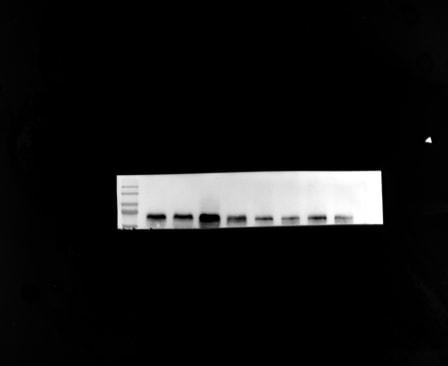

Supplement: In_Vitro_Experiment.zip [file YAP1.docx]

Relative protein expression levels of  
MAFF/ $\beta$ -actin

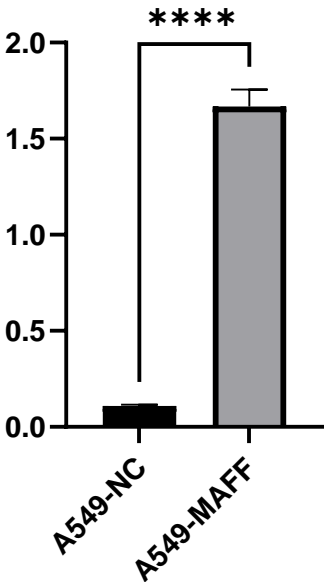

Supplement: WB.zip [file MAFF.pdf › WB/A549/MAFF.pdf]

Repeat 1 NC


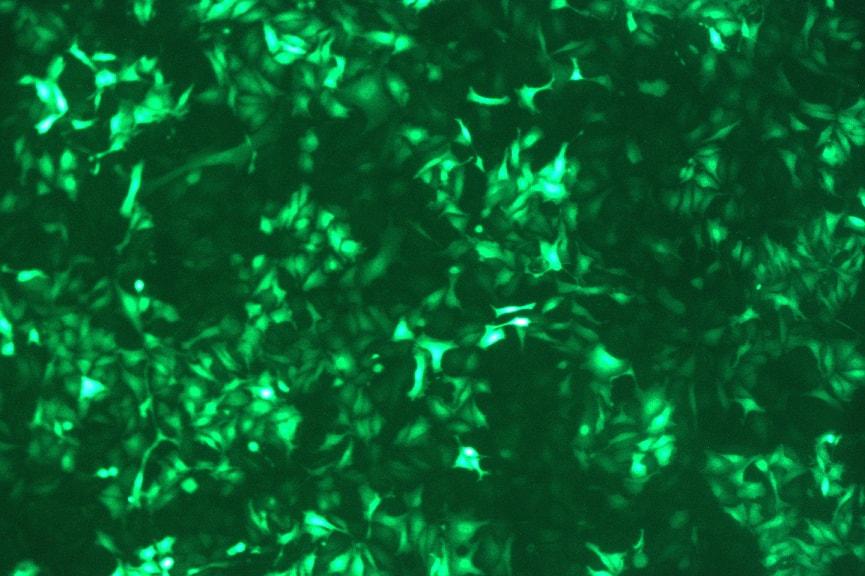

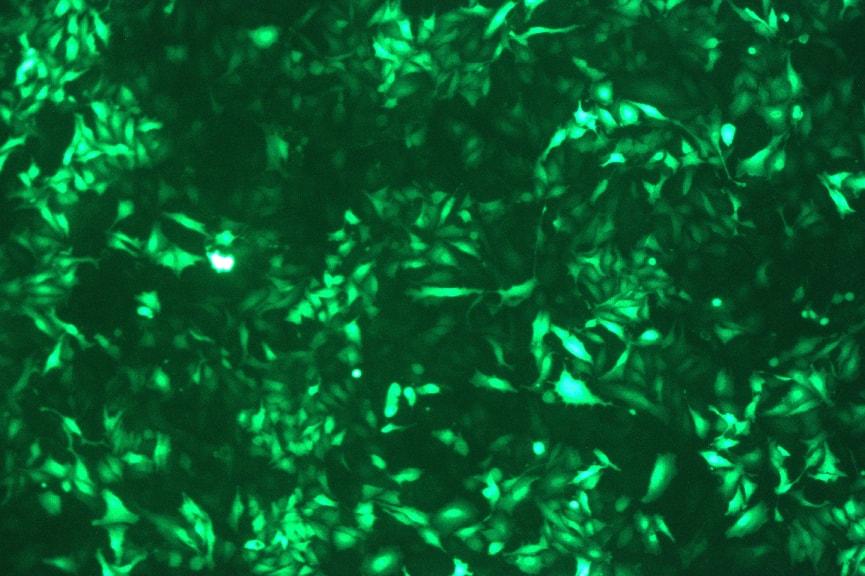

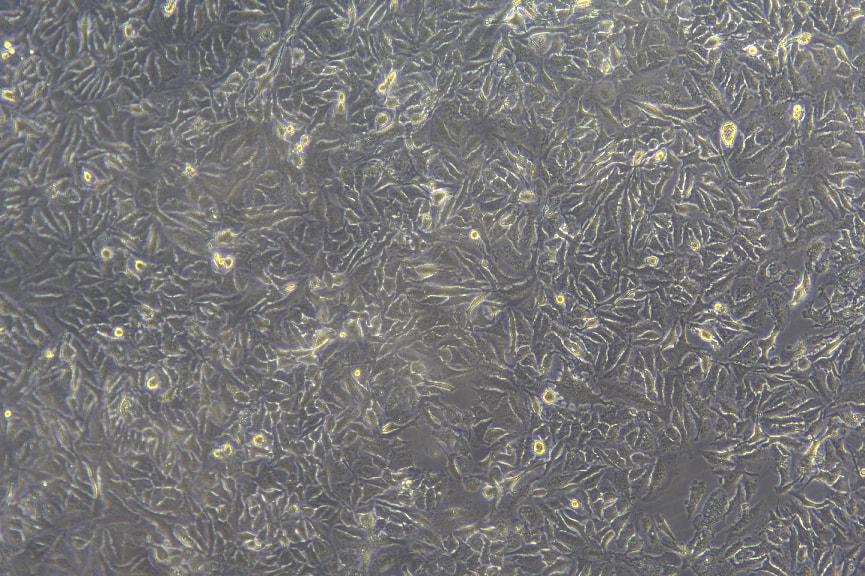

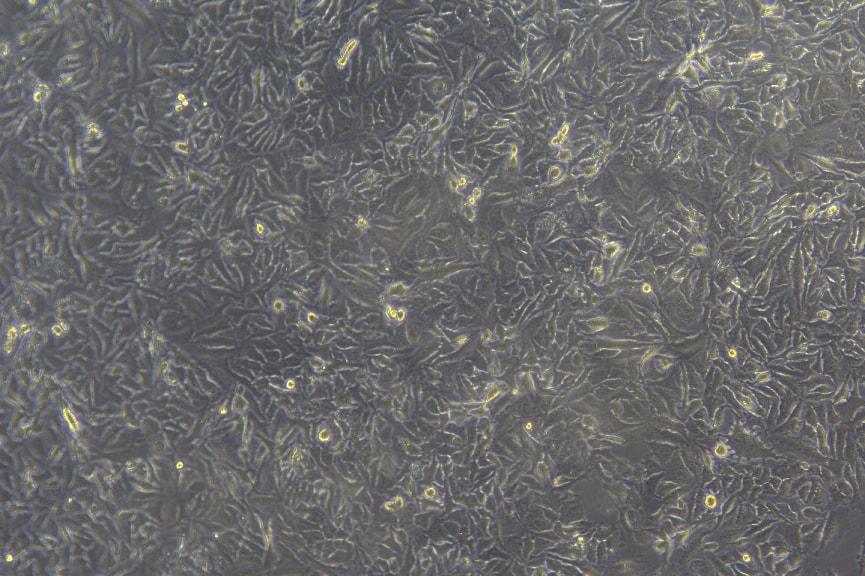

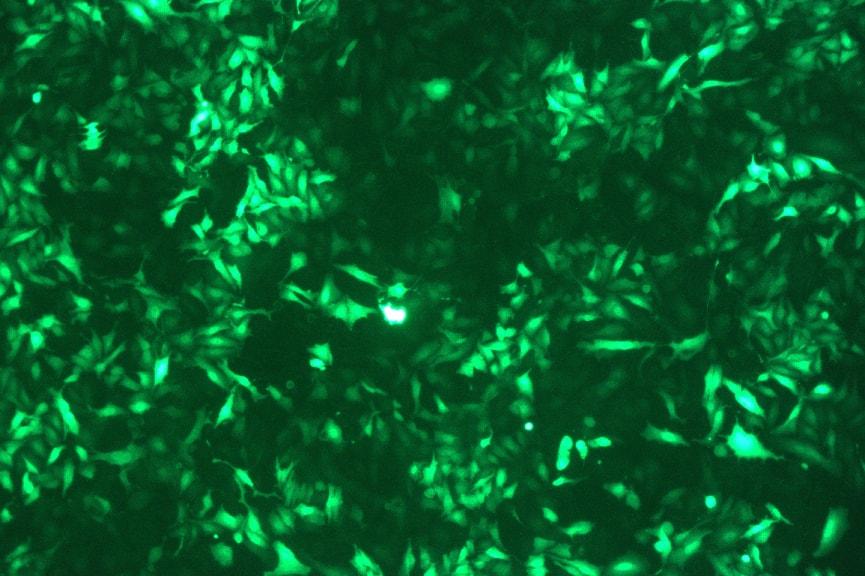

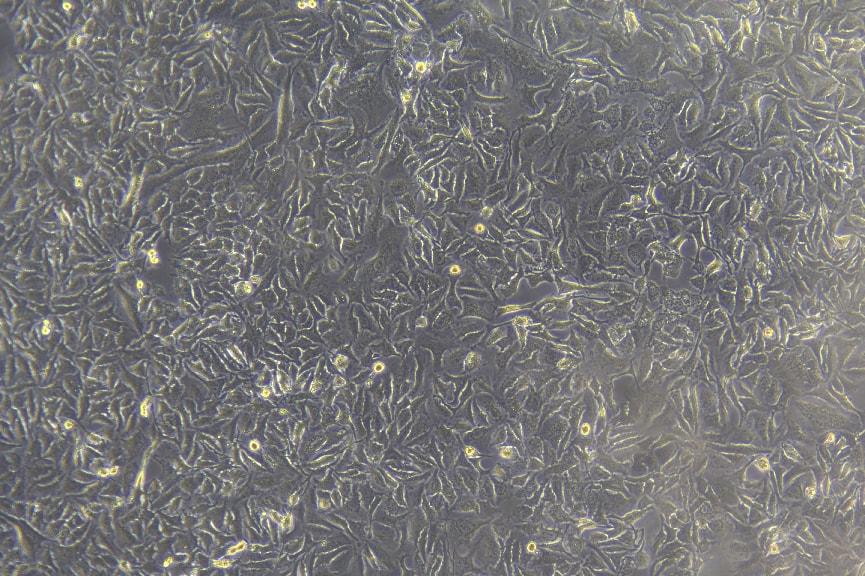


Repeat 2 MAFF


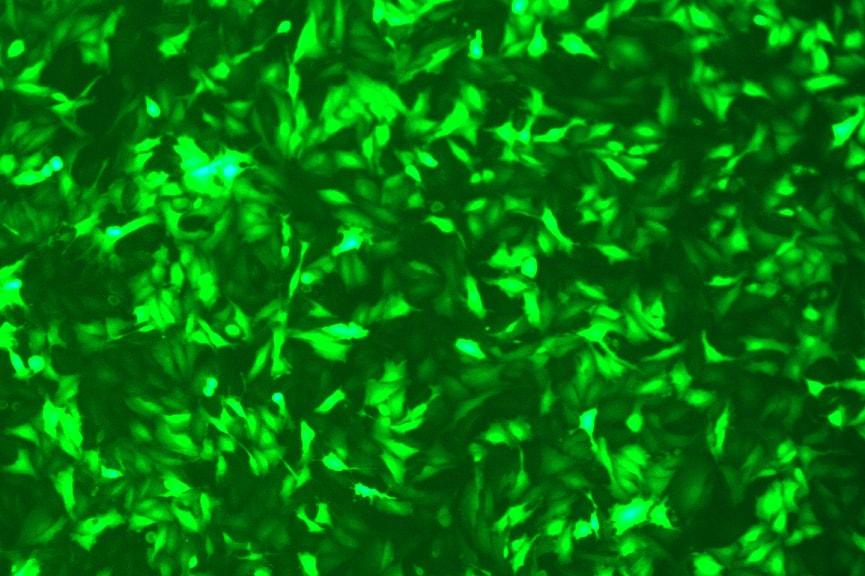

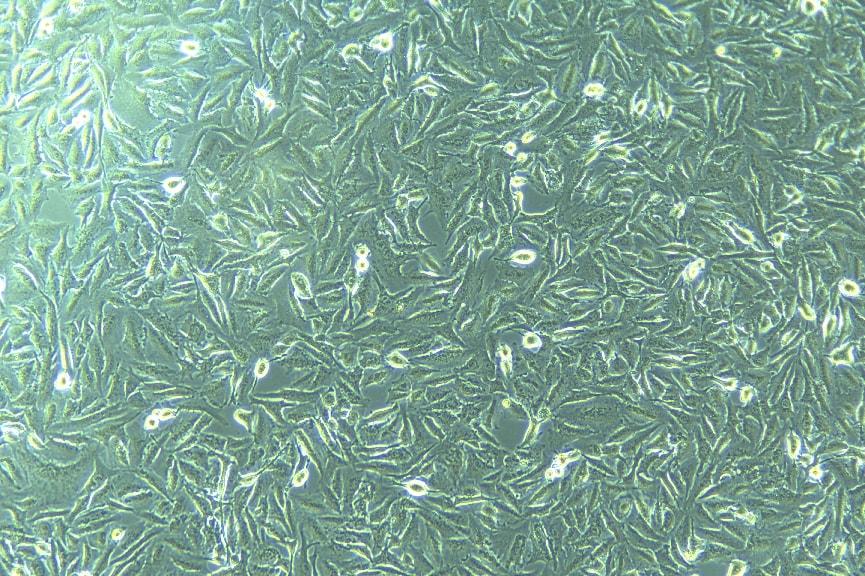

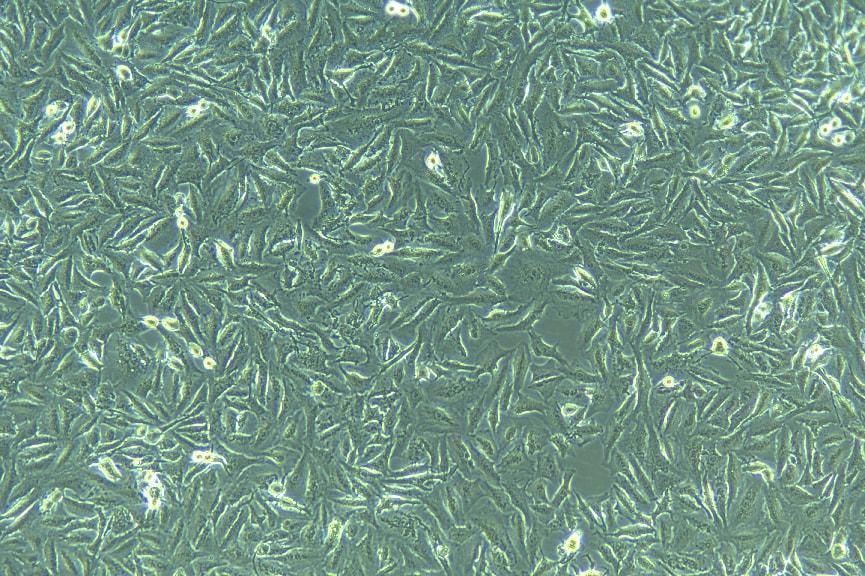

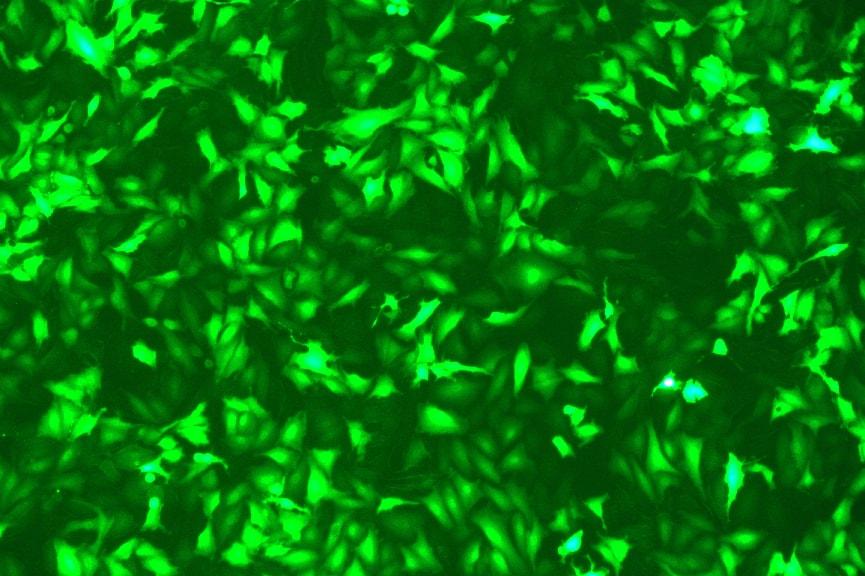

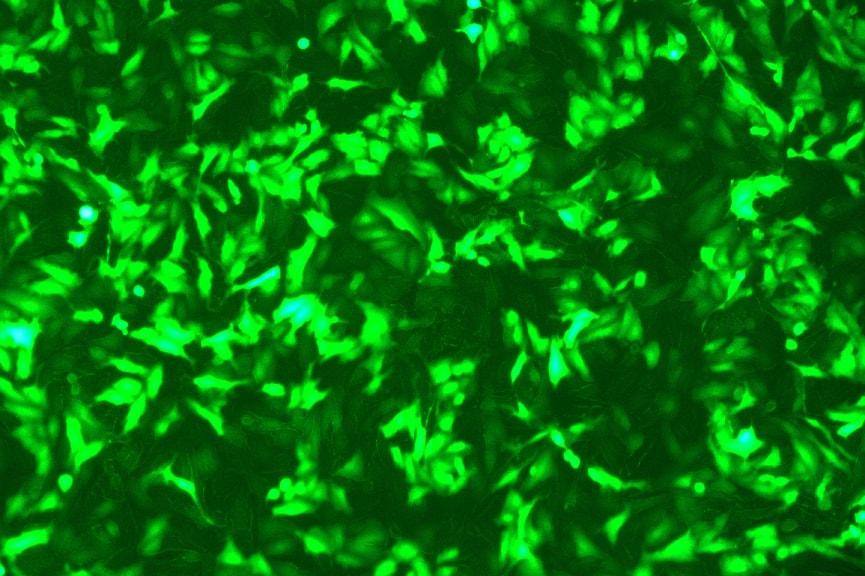

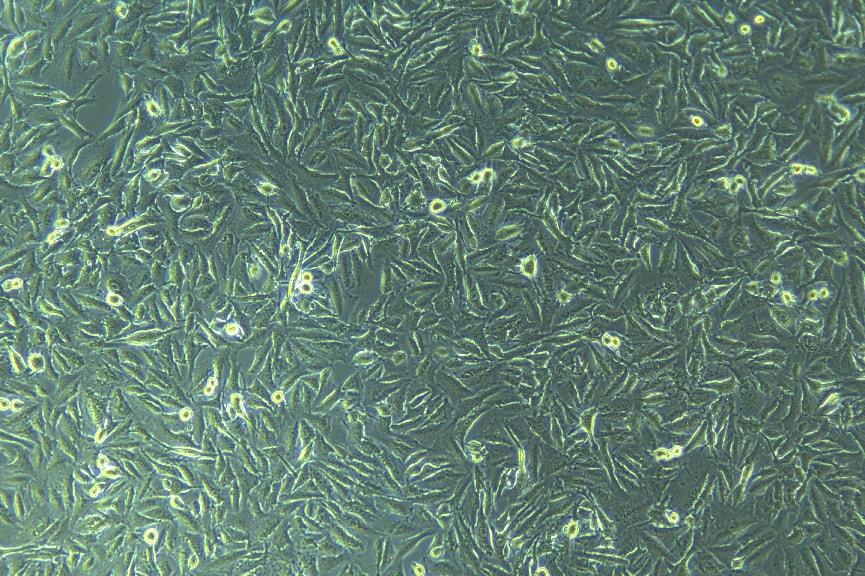


Repeat 2 NC


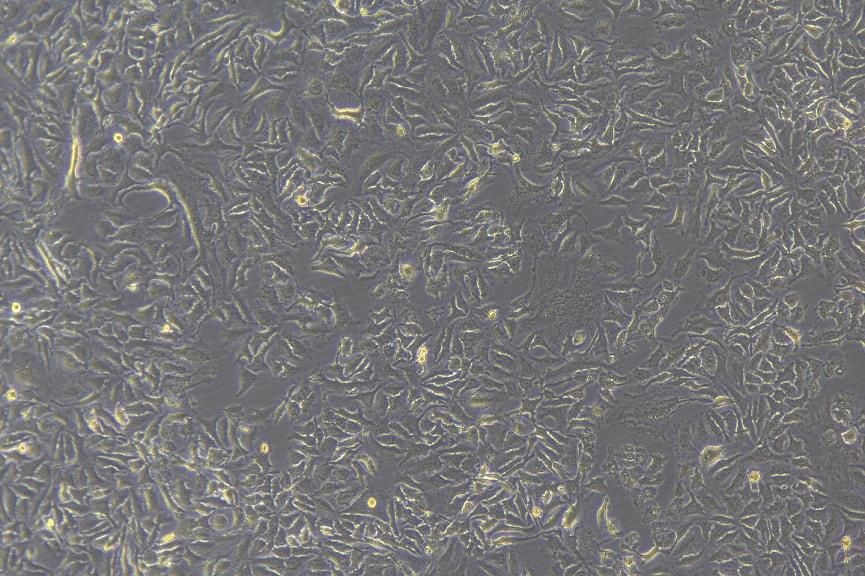

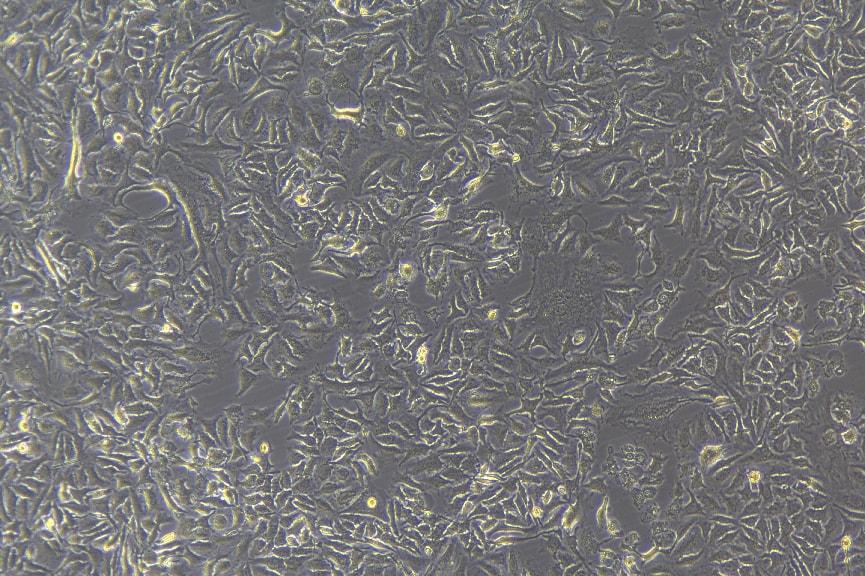

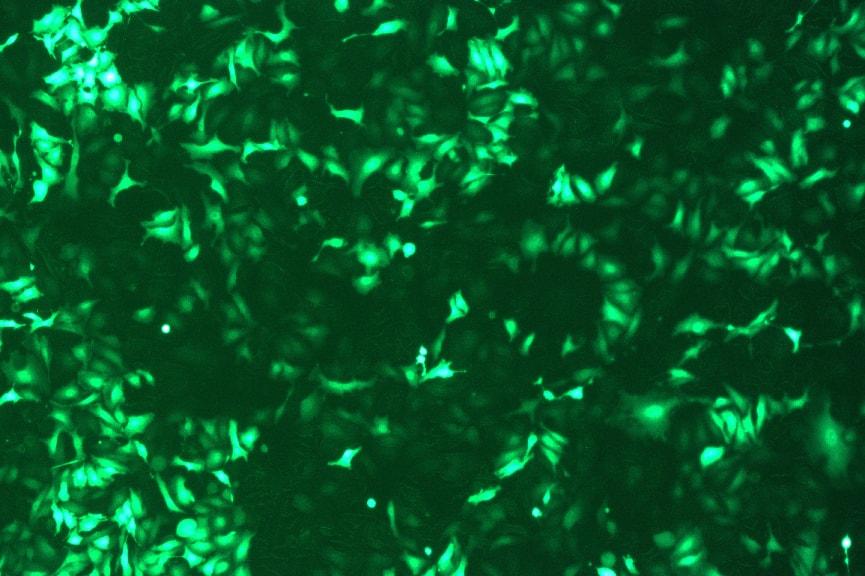

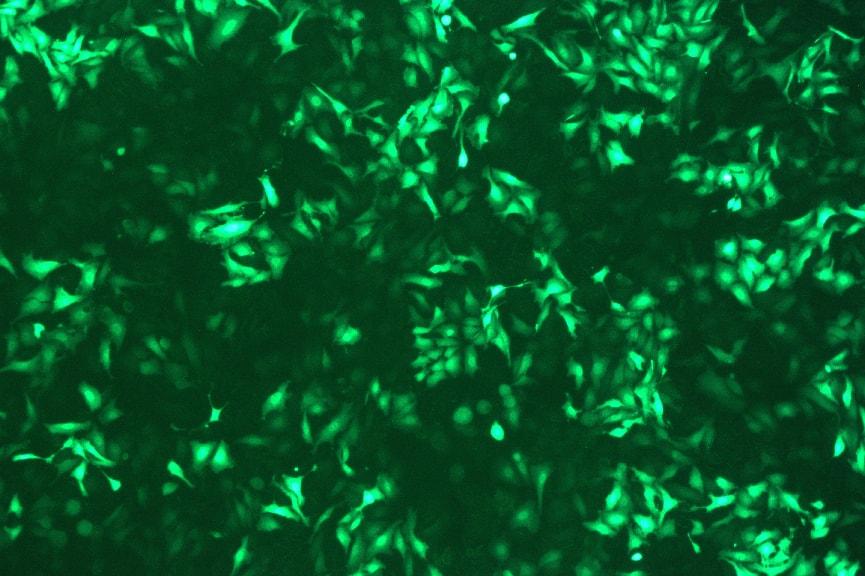

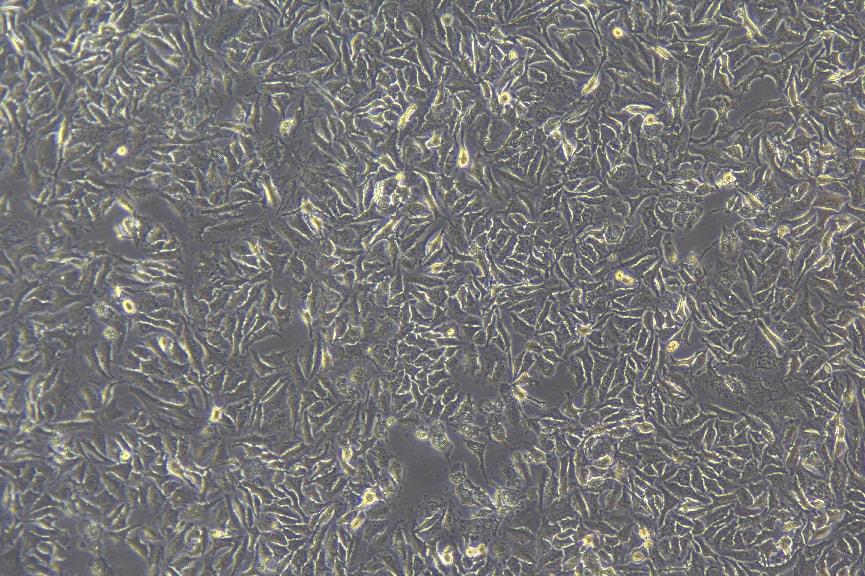

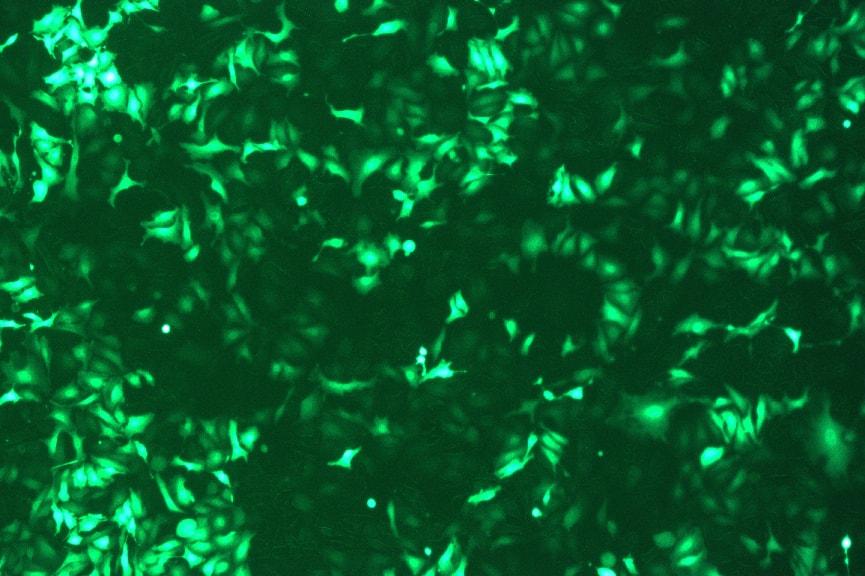


Repeat 2 MAFF


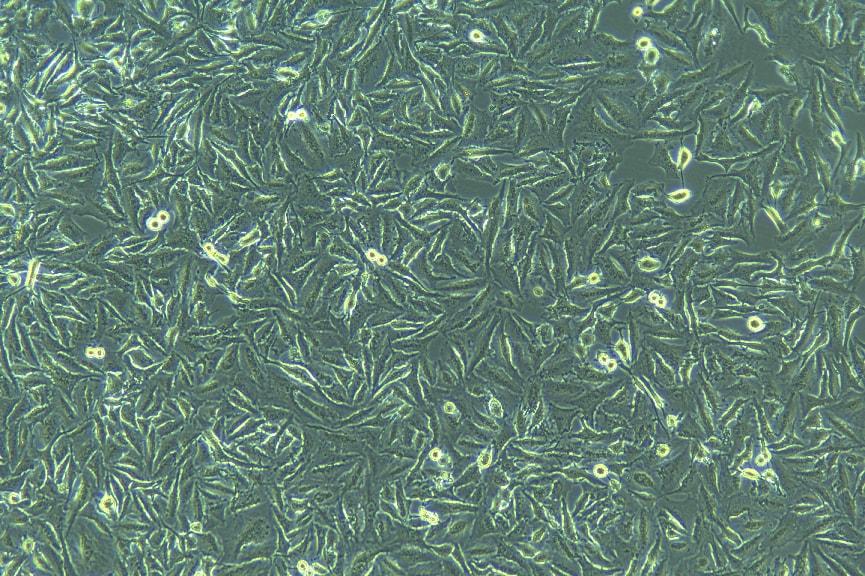

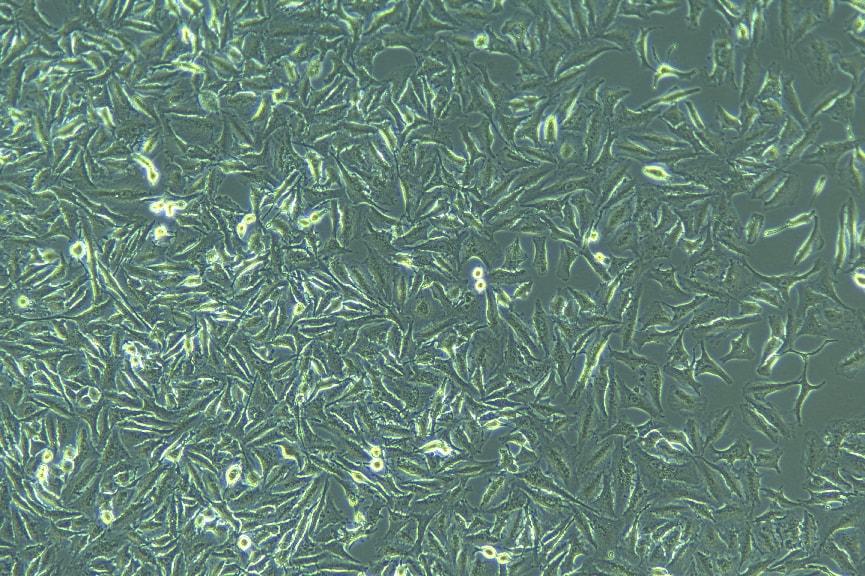

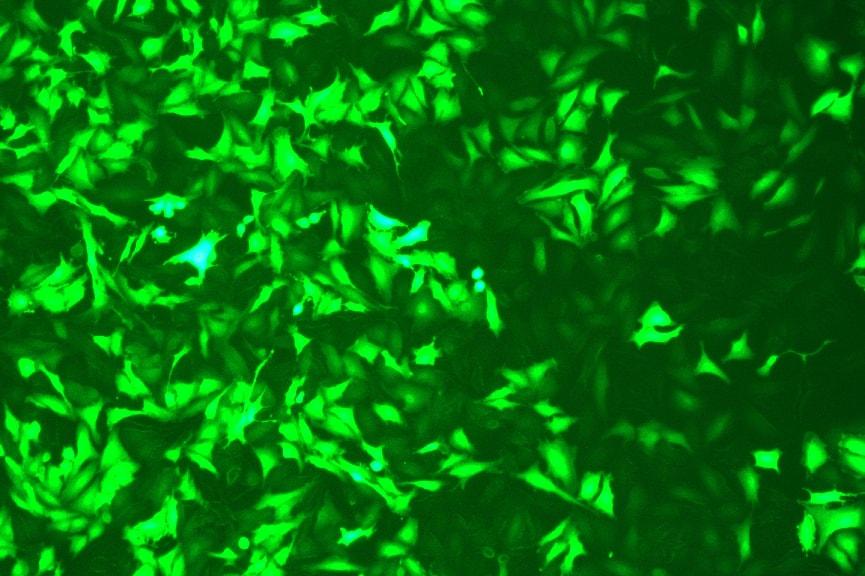

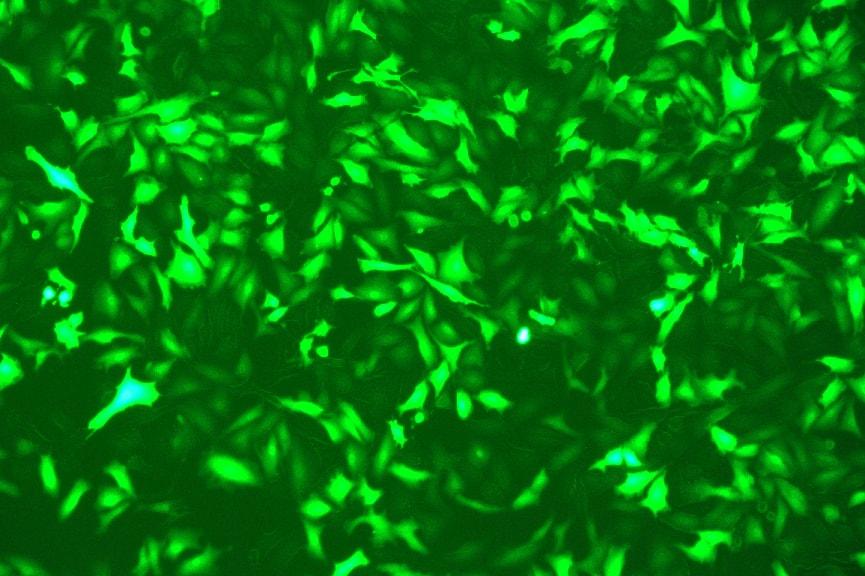

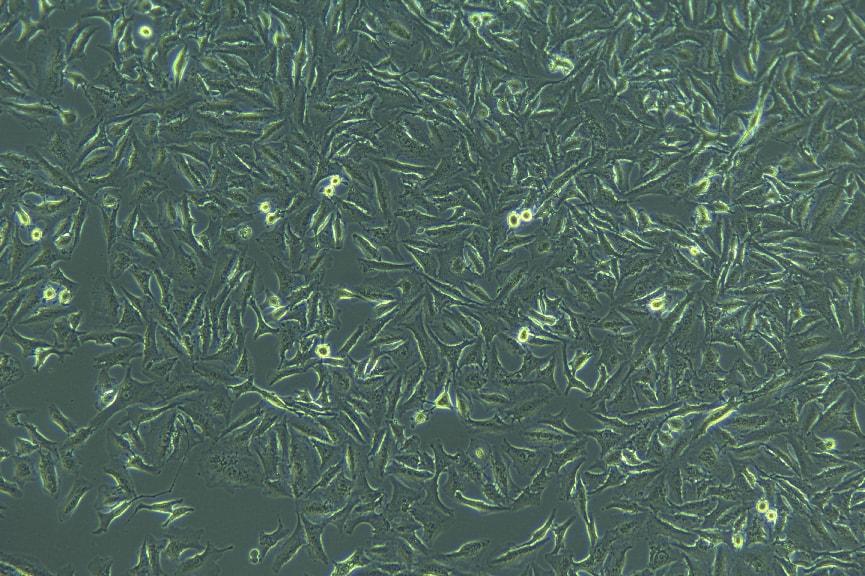

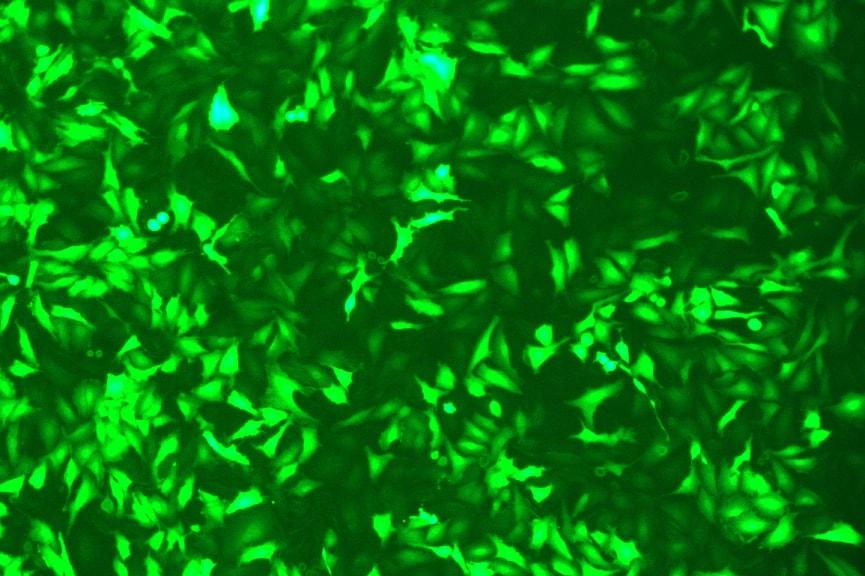


Repeat 3 NC


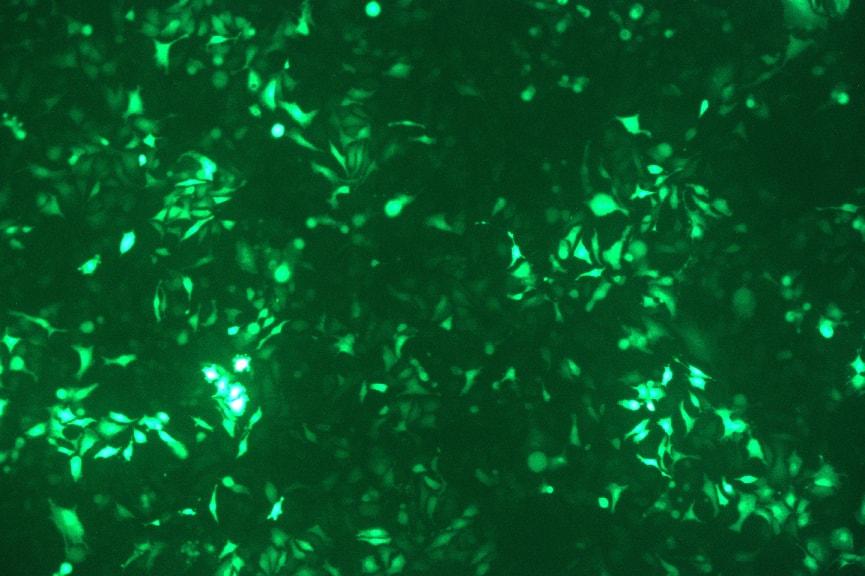

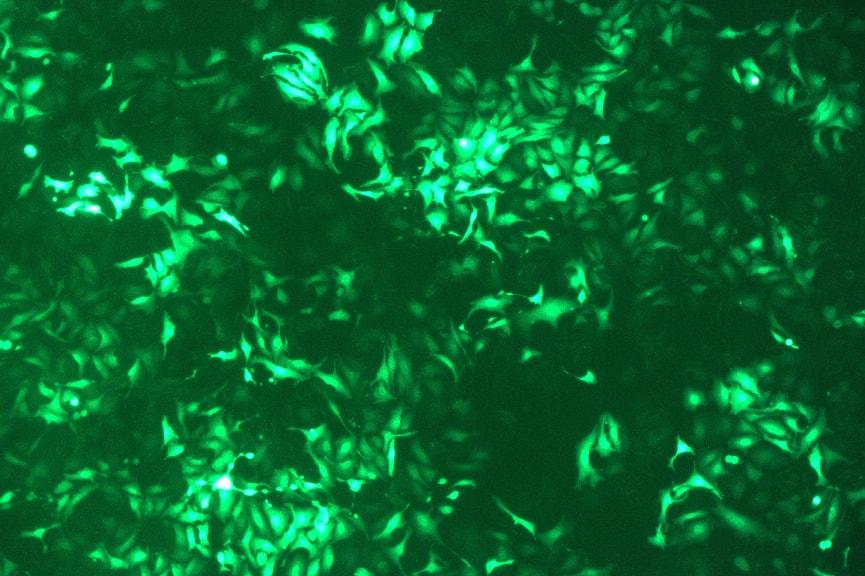

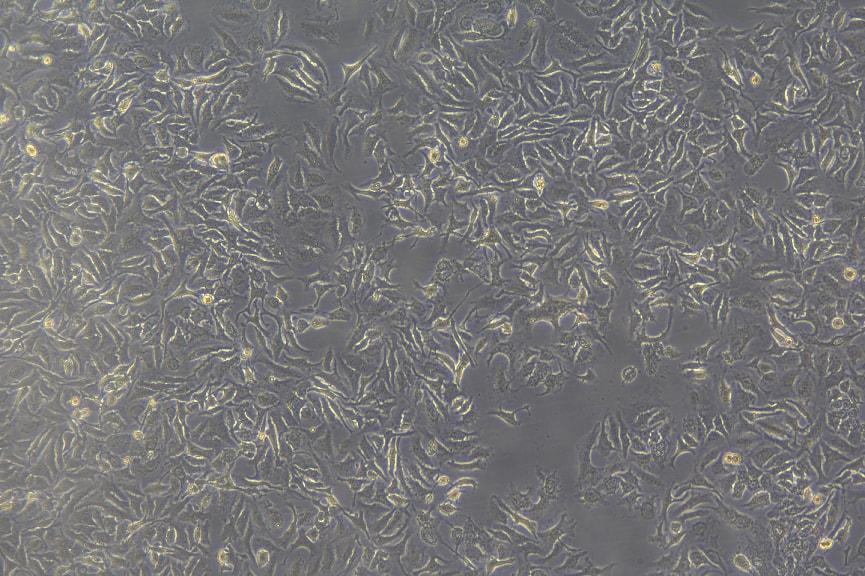

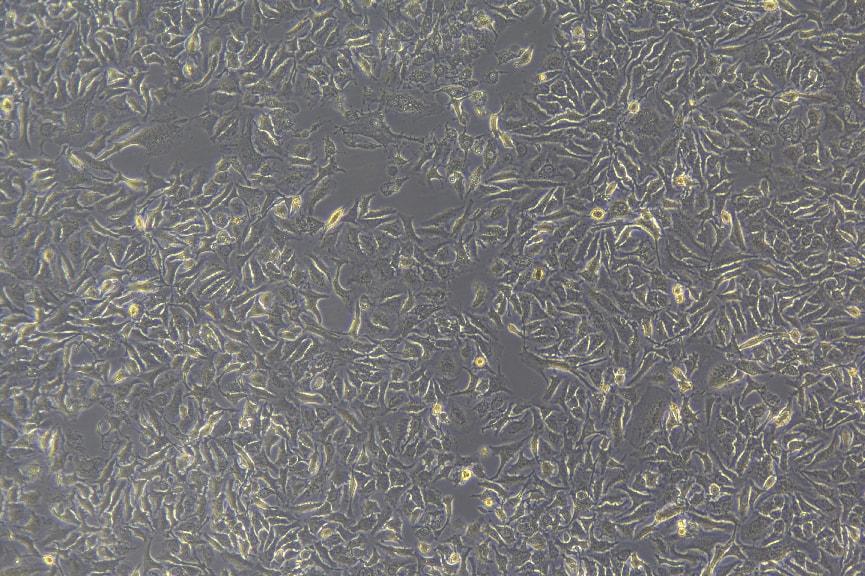

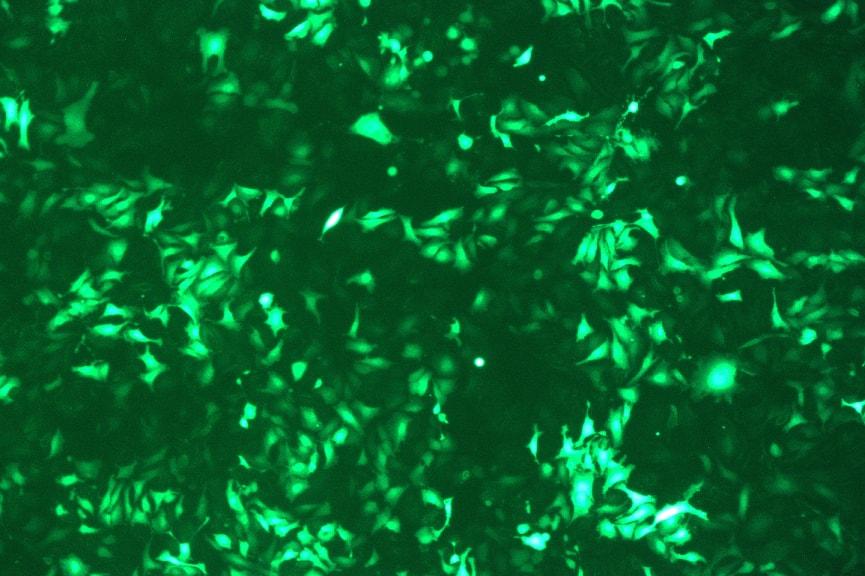

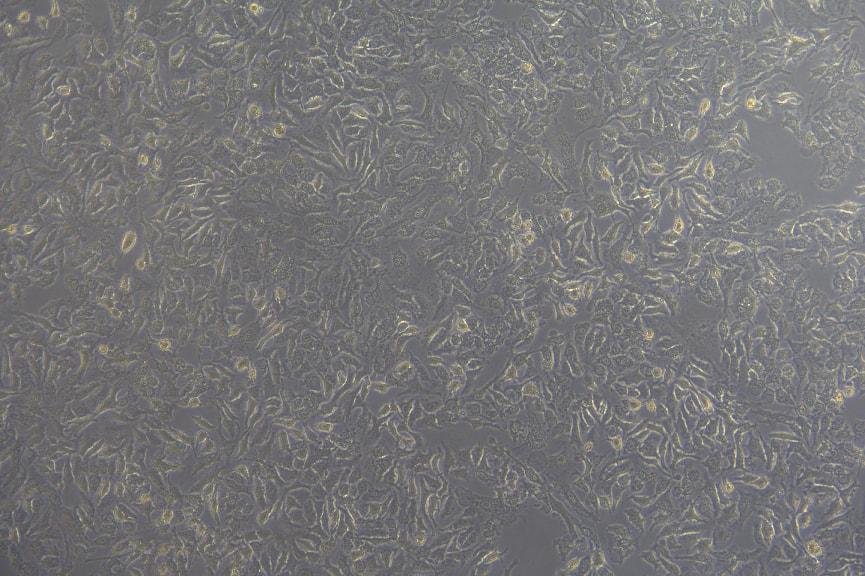


Repeat 3 MAFF


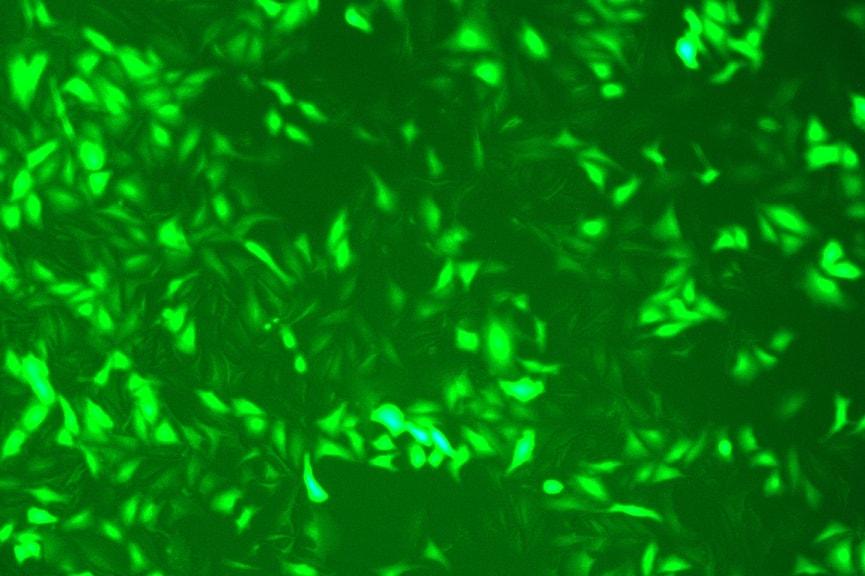

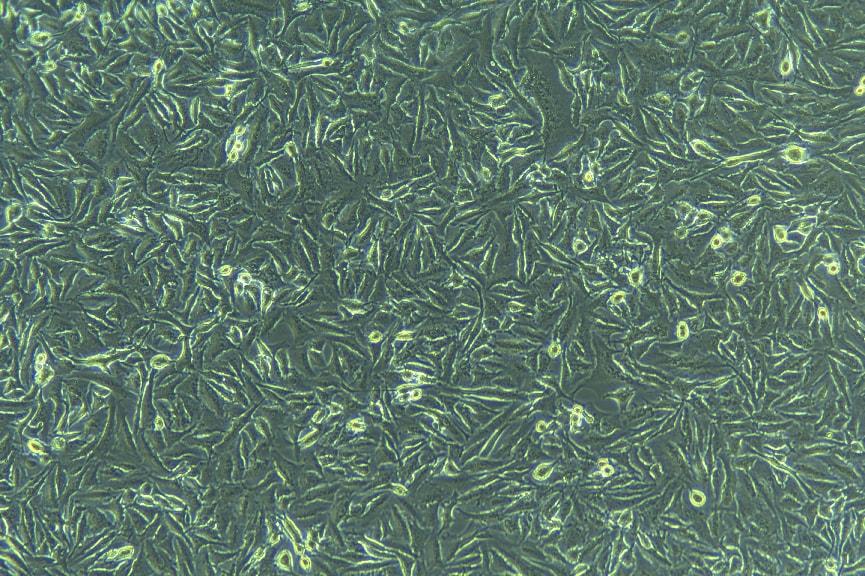

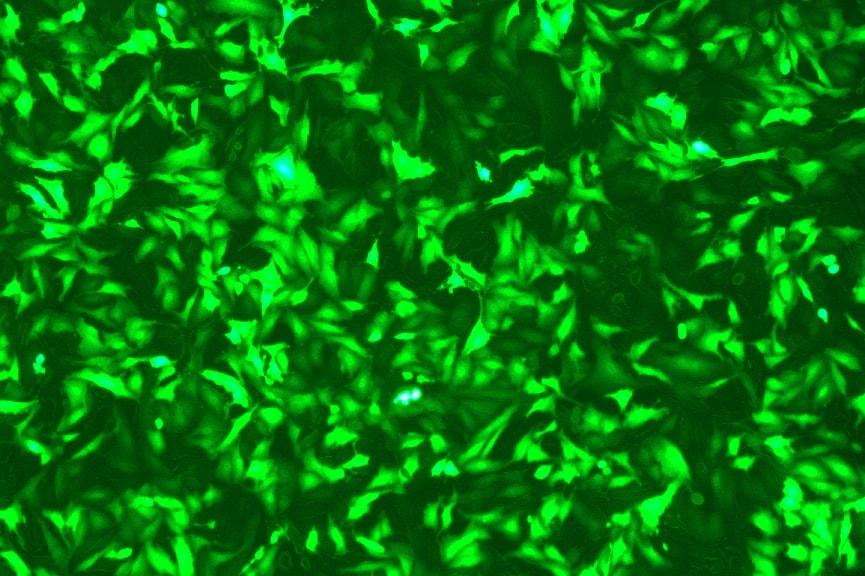

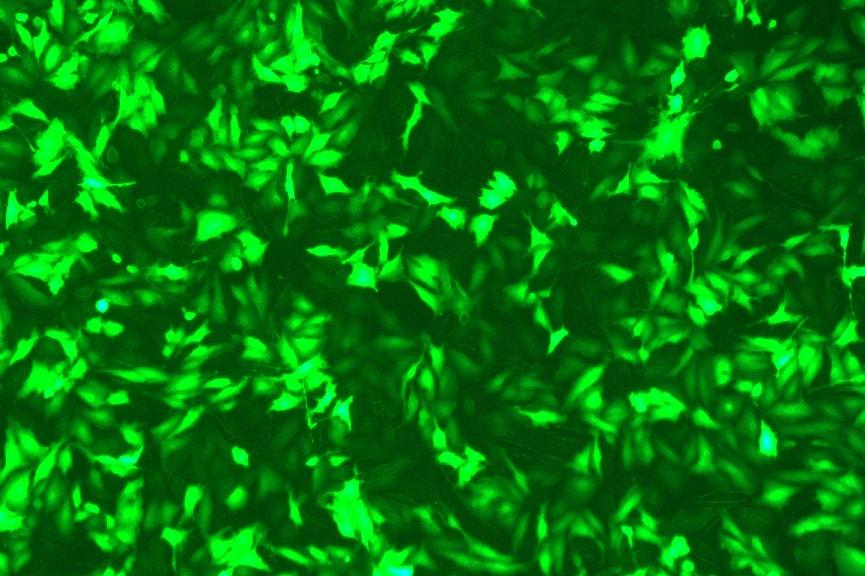

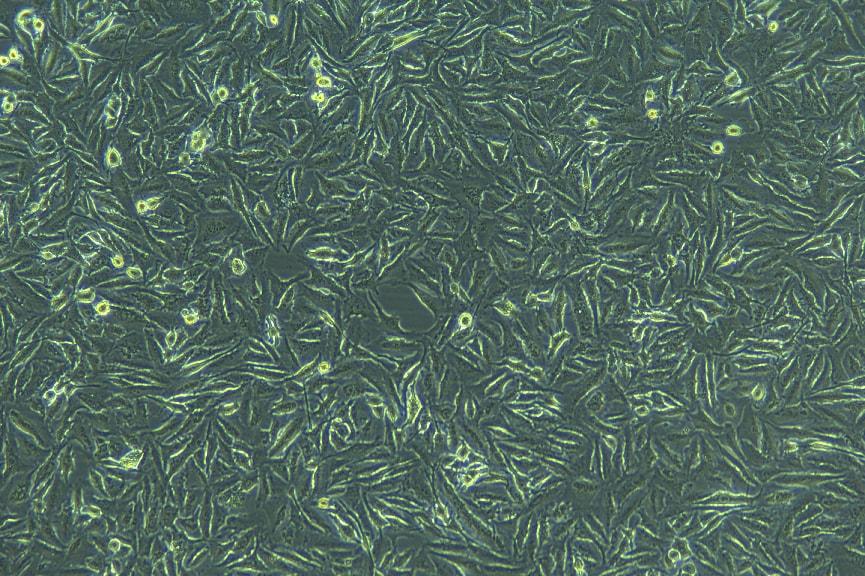

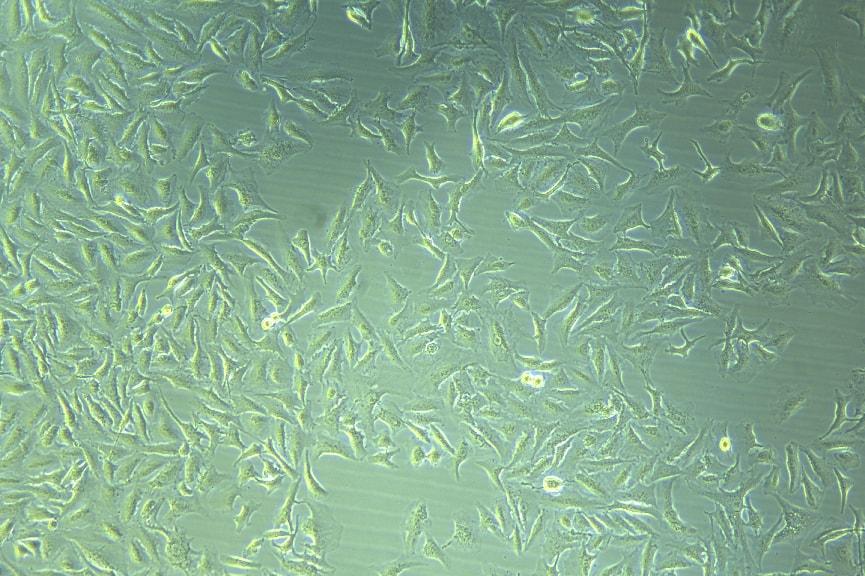

Supplement: Overexpression_Fluorescence.zip [file A549.doc]

Relative protein expression levels of  
VEGFA/ $\beta$ -actin

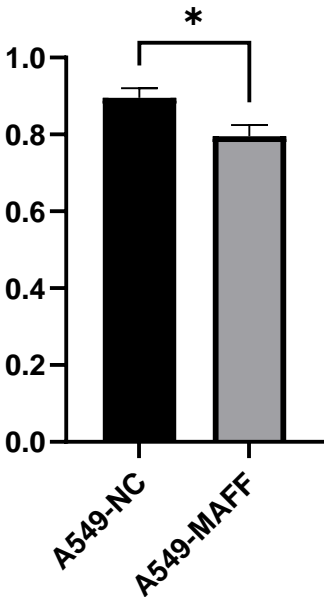

Supplement: WB.zip [file VEGFA.pdf › WB/A549/VEGFA.pdf]

Relative protein expression levels of  
YAP1/ $\beta$ -actin

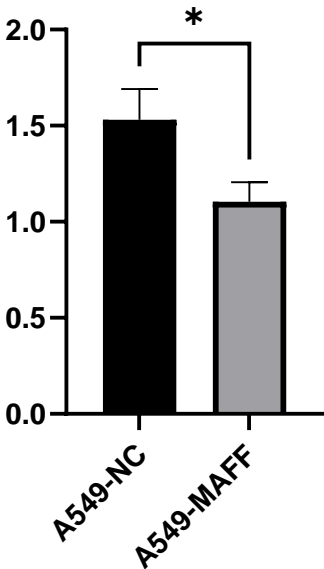

Supplement: WB.zip [file YAP1.pdf › WB/A549/YAP1.pdf]

Relative protein expression levels of  
CTGF/ $\beta$ -actin

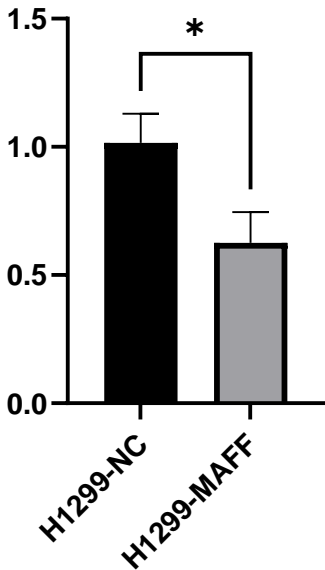

Supplement: WB.zip [file CTGF.pdf › WB/H1299/CTGF.pdf]

Relative protein expression levels of  
MAFF/ $\beta$ -actin

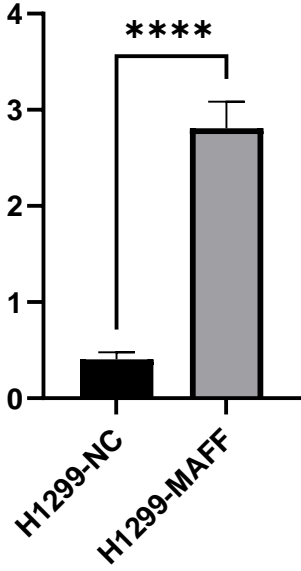

Supplement: WB.zip [file MAFF.pdf › WB/H1299/MAFF.pdf]

Repeat 1

CTGF


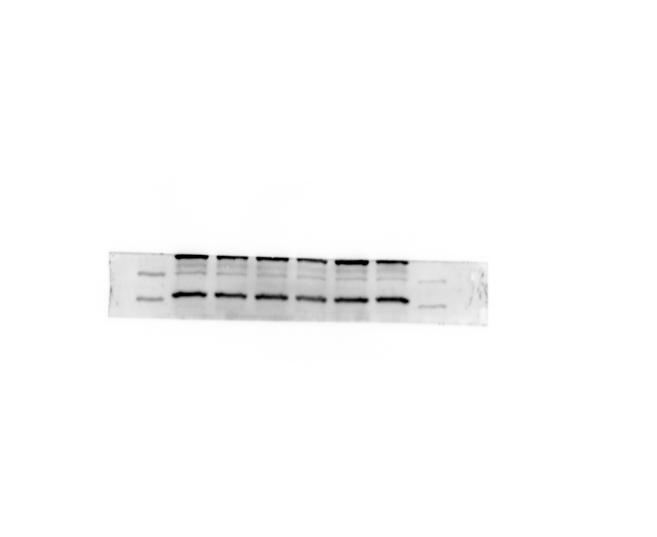

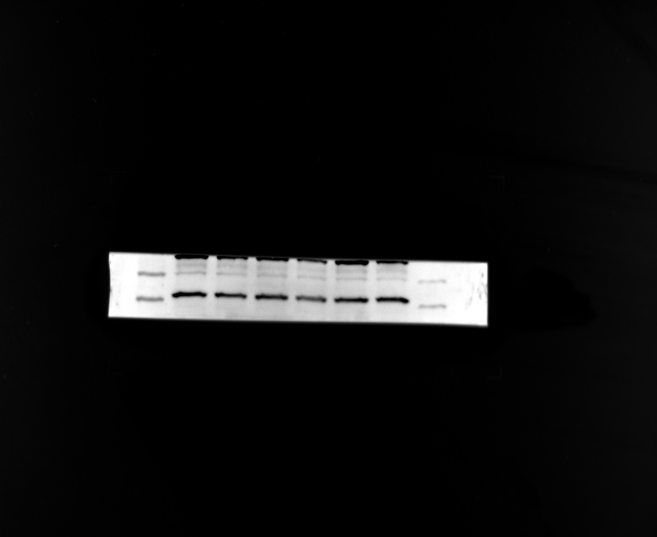


β-actin


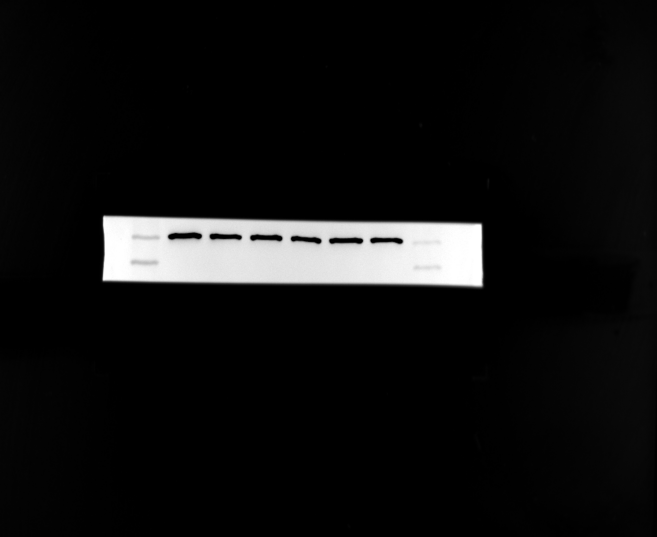

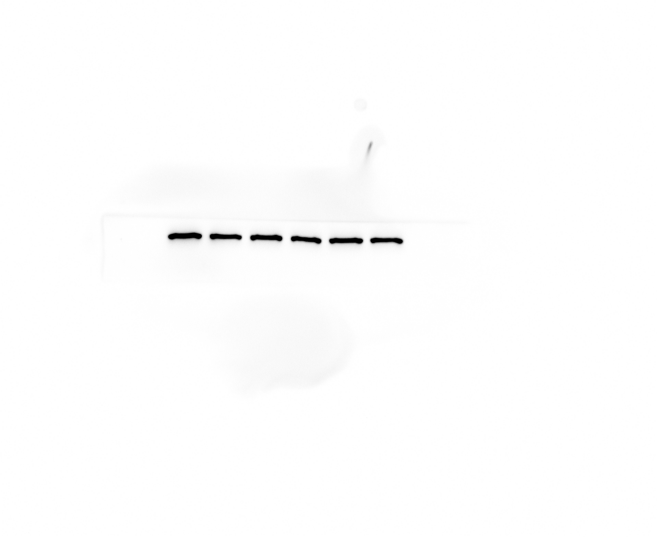


Repeat 2

CTGF


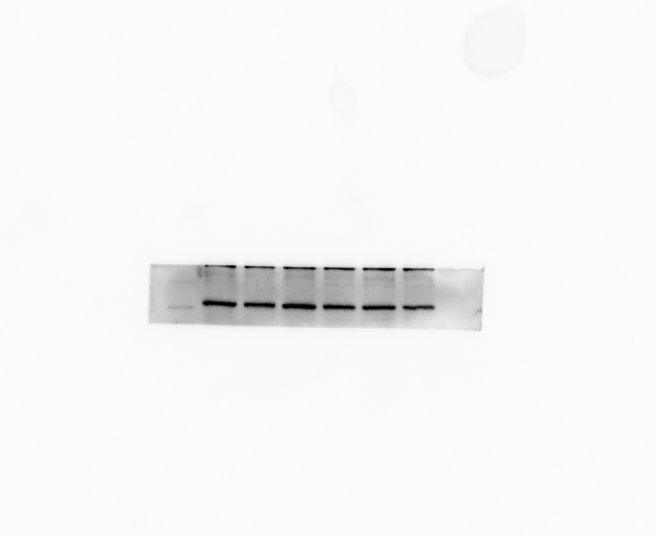

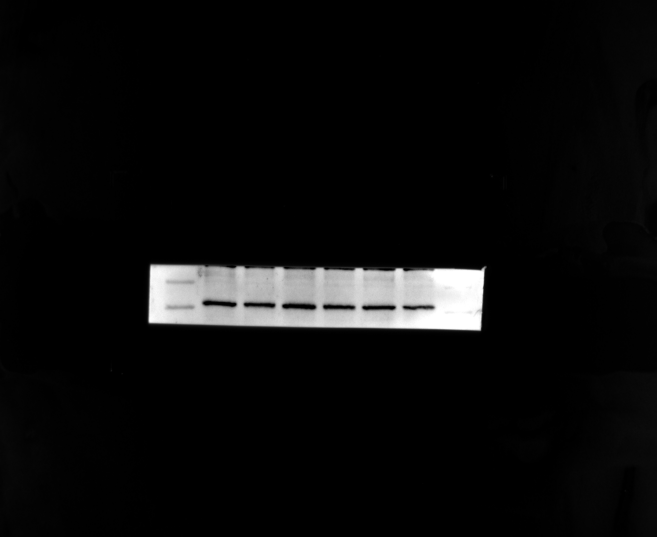


β-actin


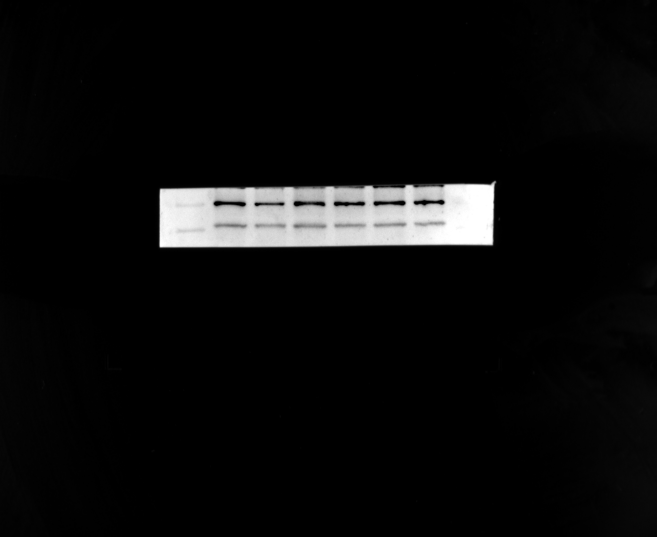


Repeat 3

CTGF


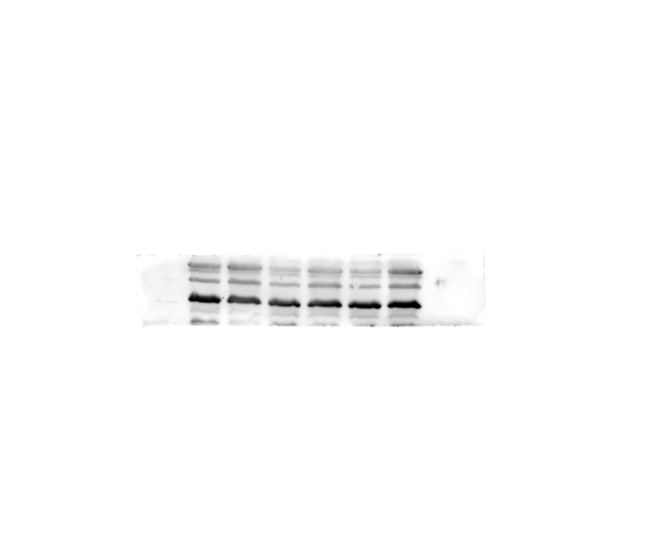

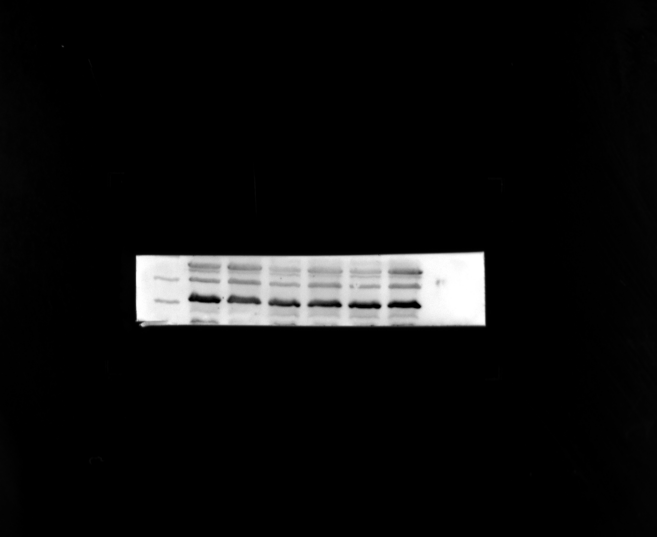


β-actin


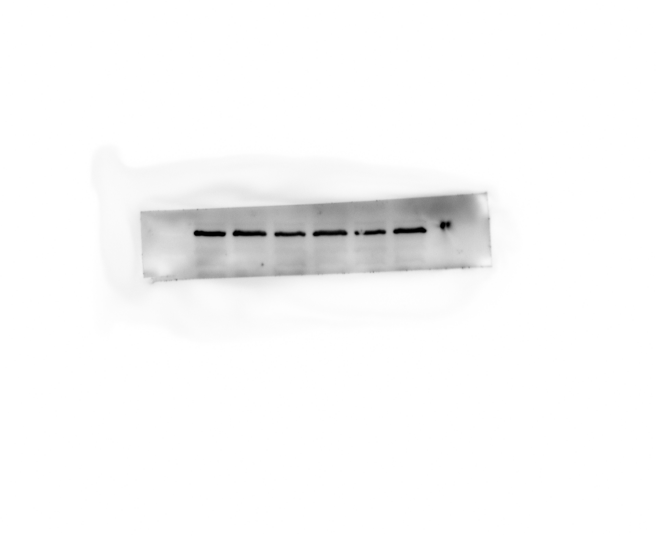

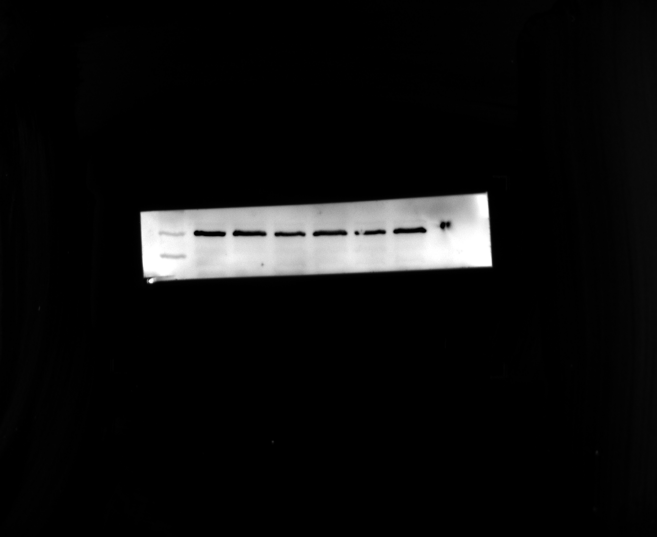

Supplement: WB.zip [file CTGF.docx]

Relative protein expression levels of  
VEGFA/ $\beta$ -actin

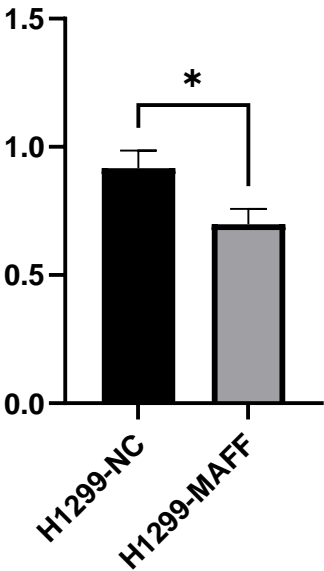

Supplement: WB.zip [file VEGFA.pdf › WB/H1299/VEGFA.pdf]

Repeat 1

MAFF


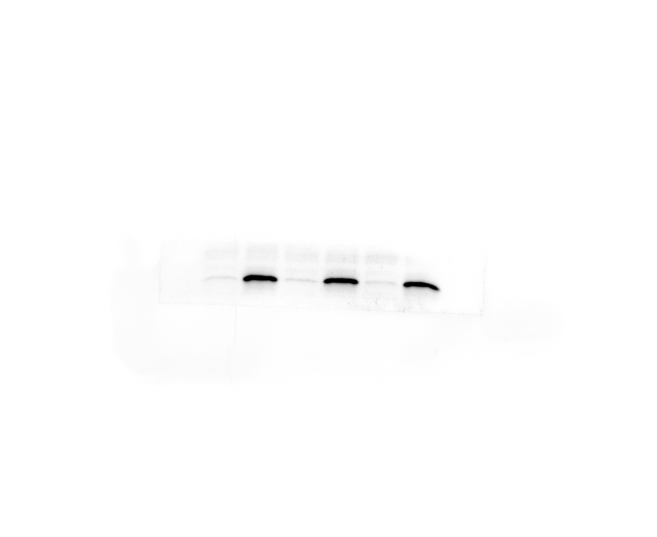

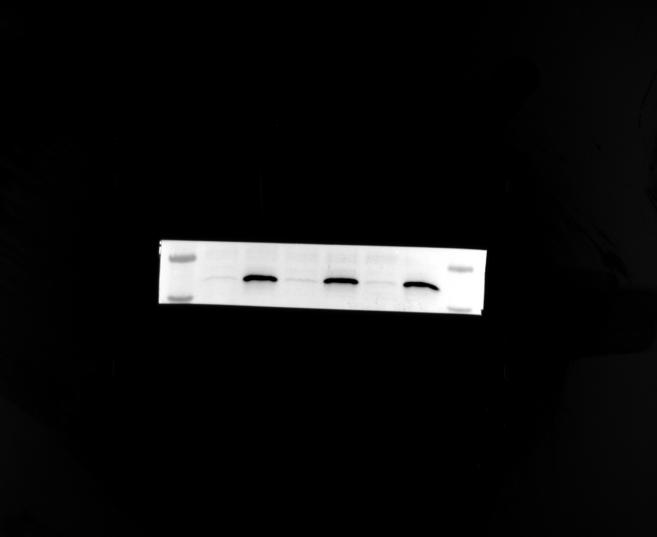


β-actin


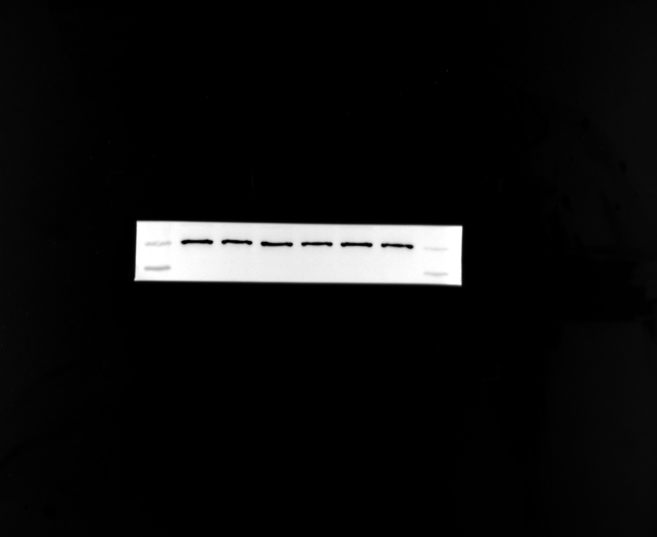

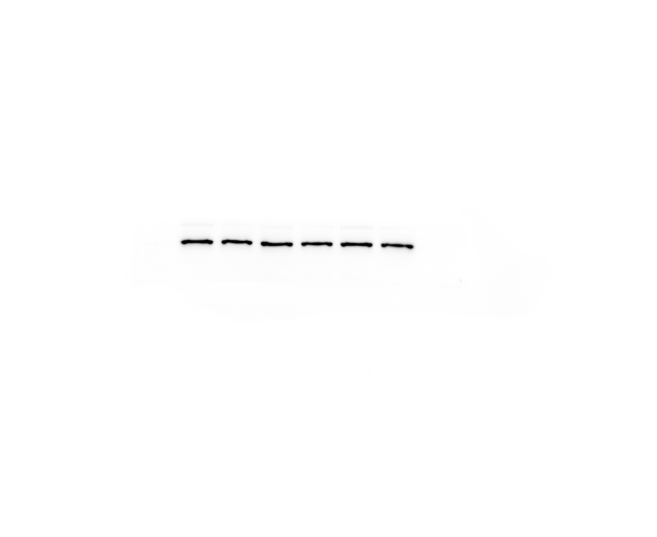


Repeat 2

MAFF


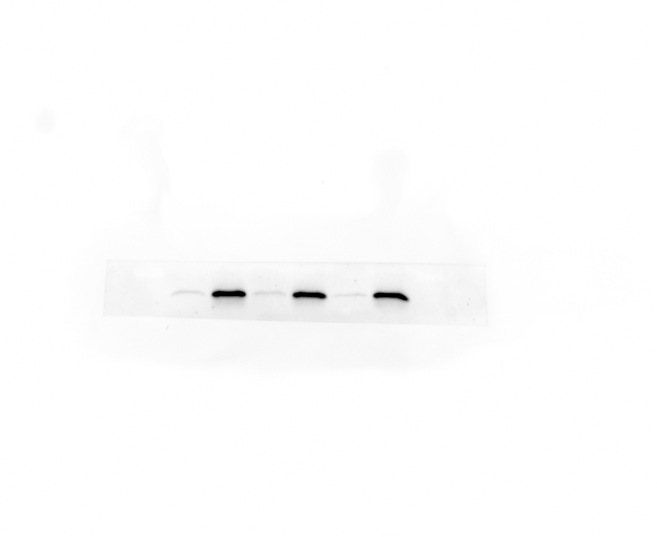

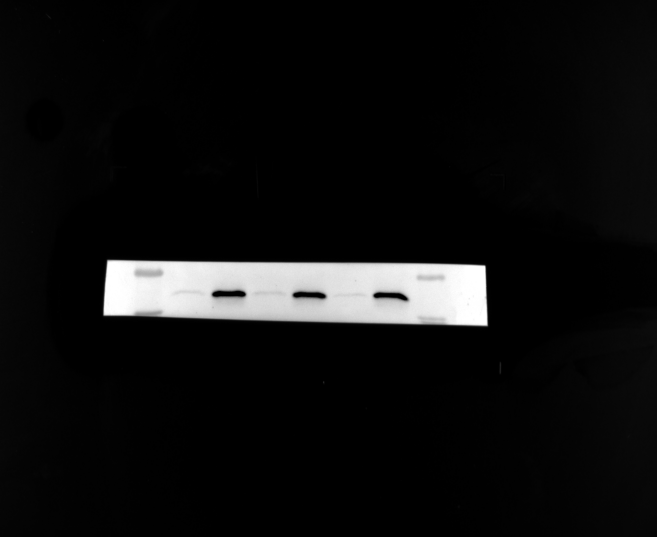


β-actin


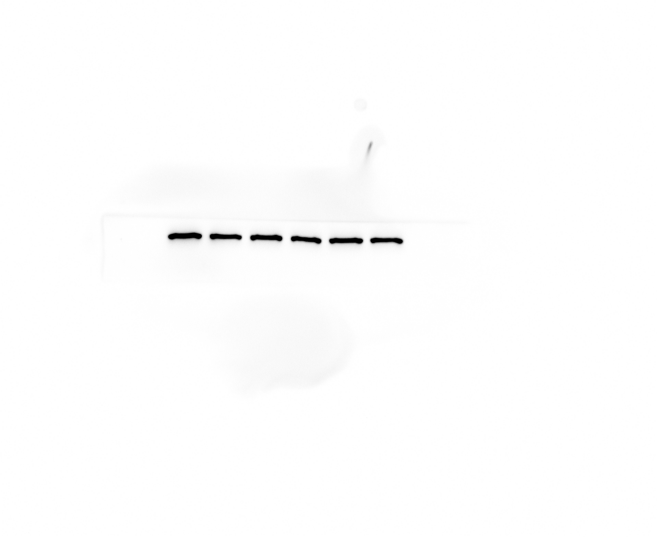

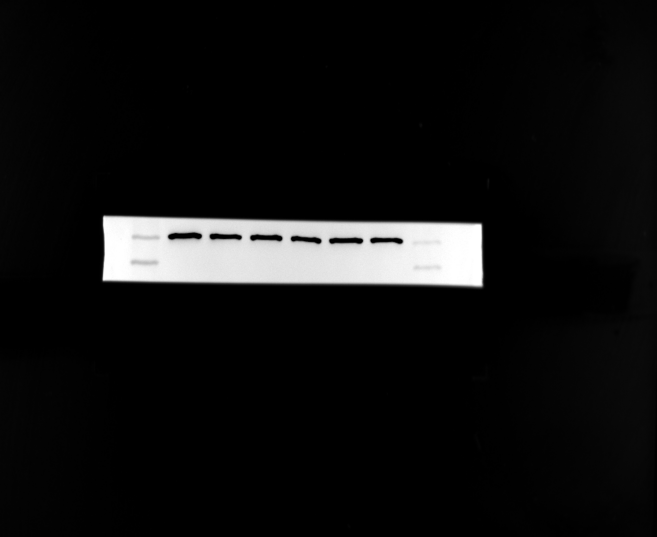


Repeat 3

MAFF


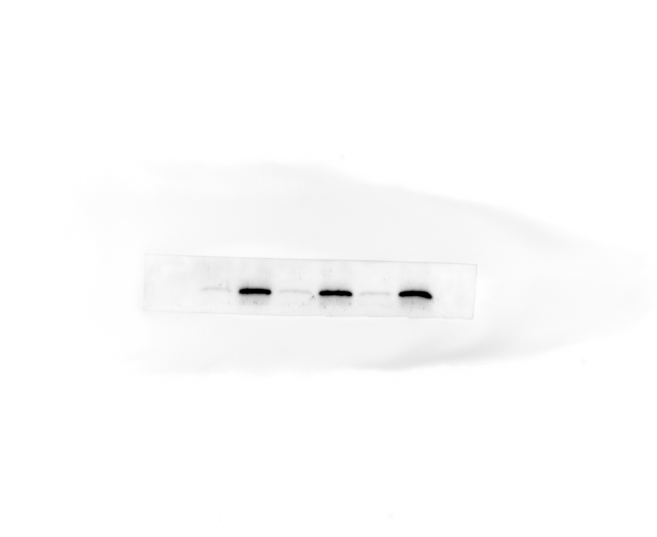

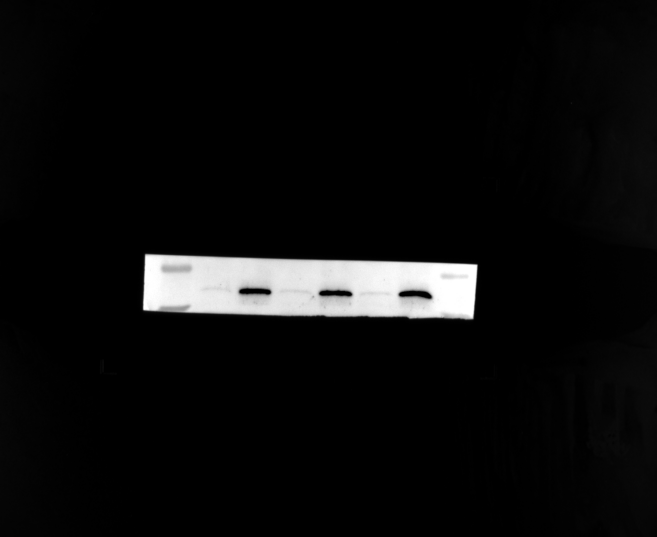


β-actin


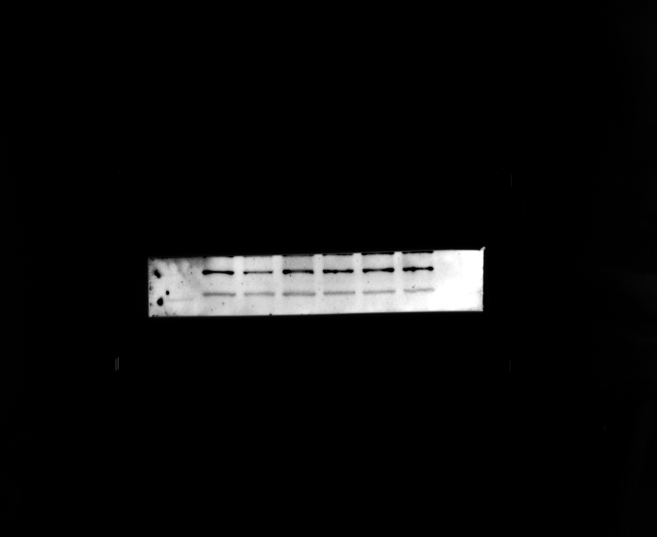

Supplement: WB.zip [file MAFF.docx]

Repeat 1

VEGFA


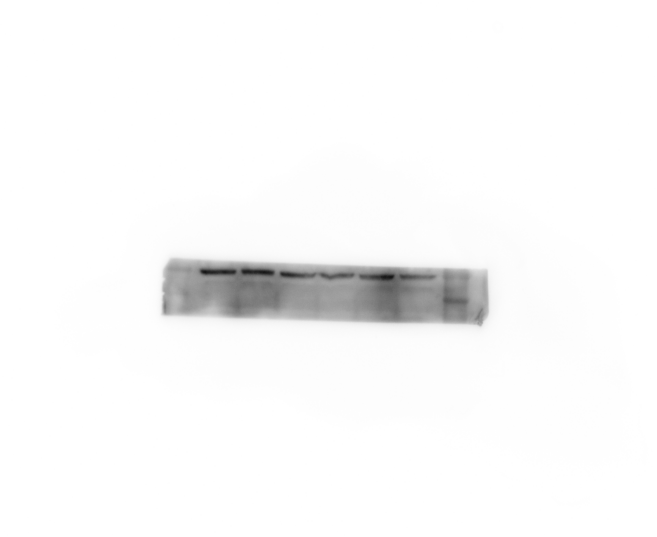

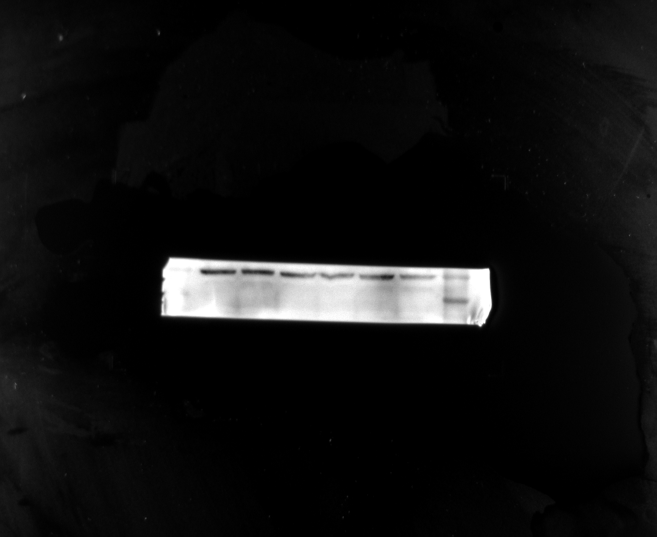


β-actin


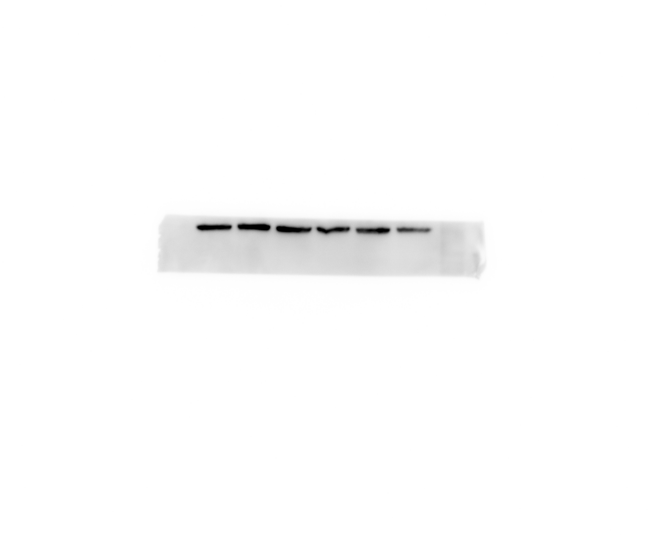

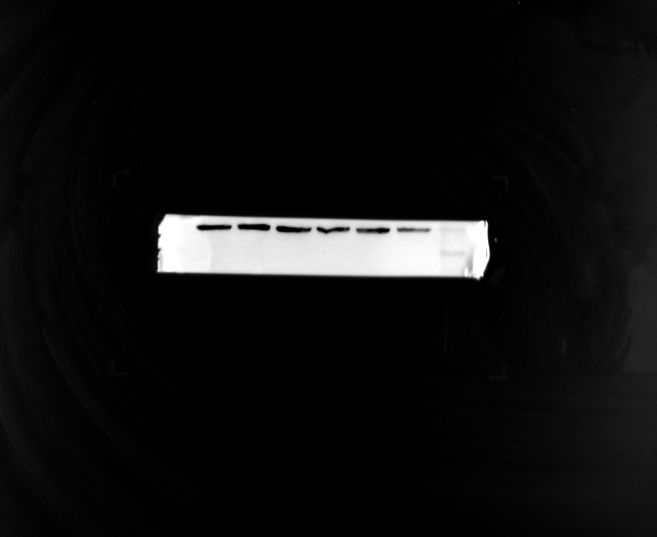


Repeat 2

VEGFFA


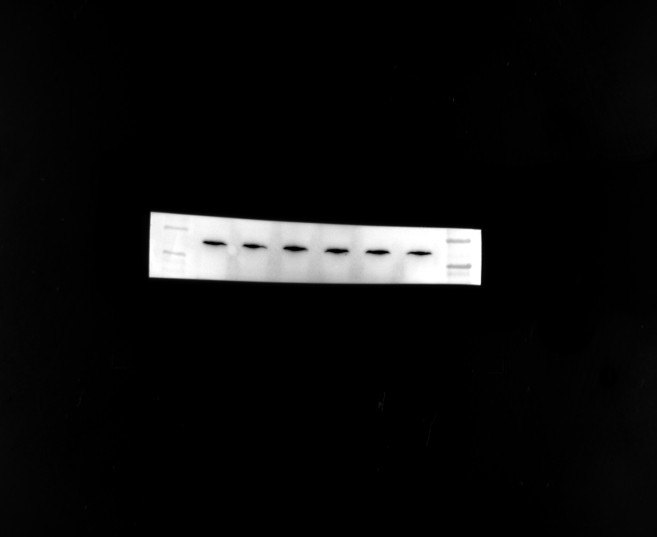

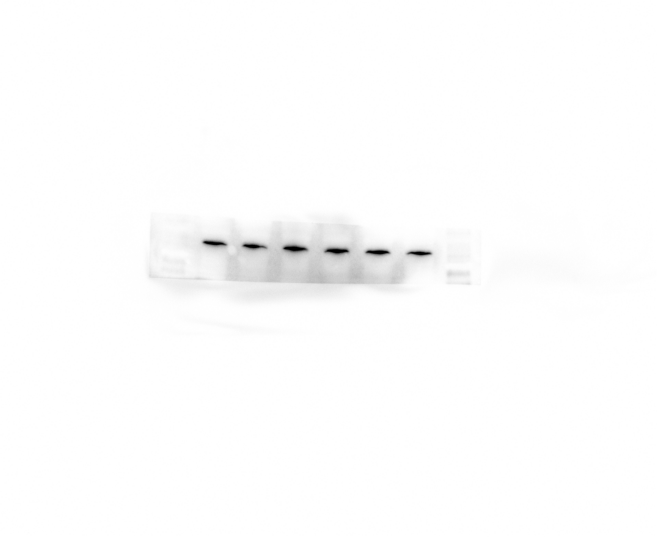


β-actin


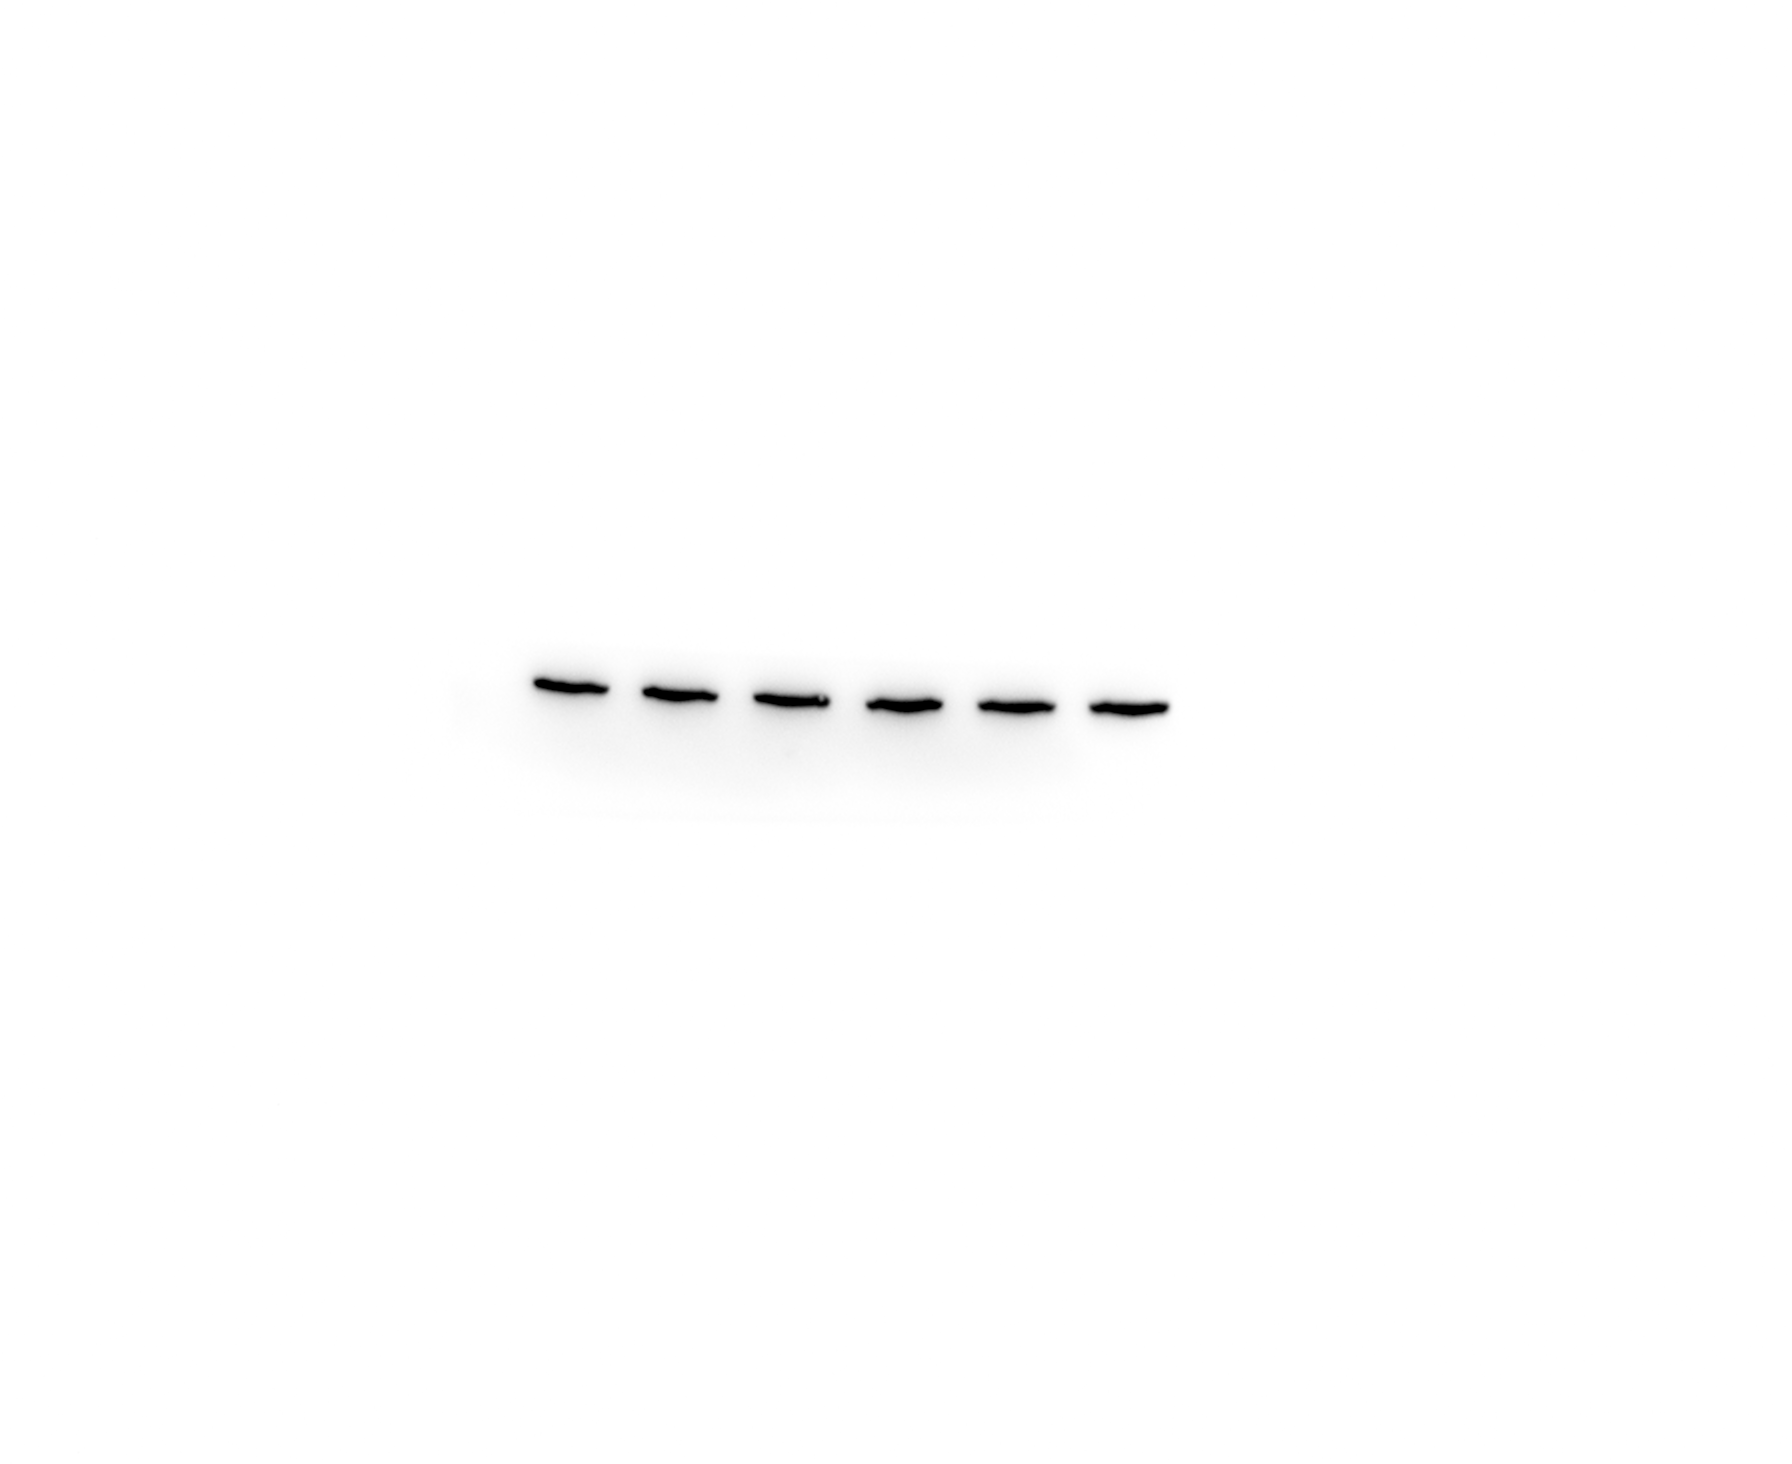

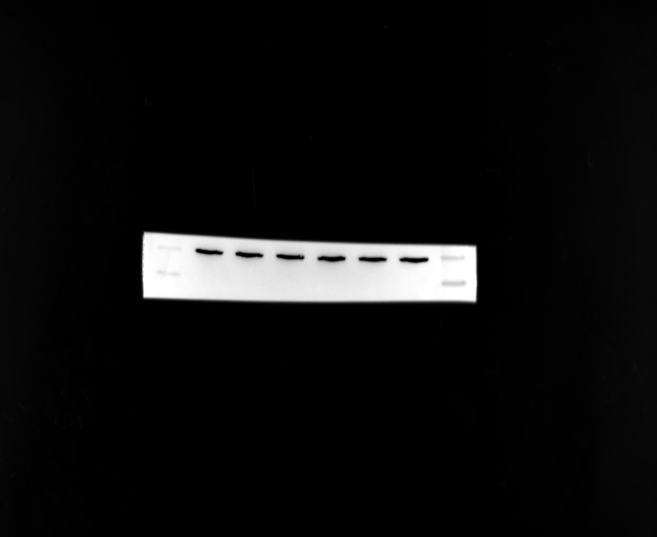


Repeat 3

VEGFA


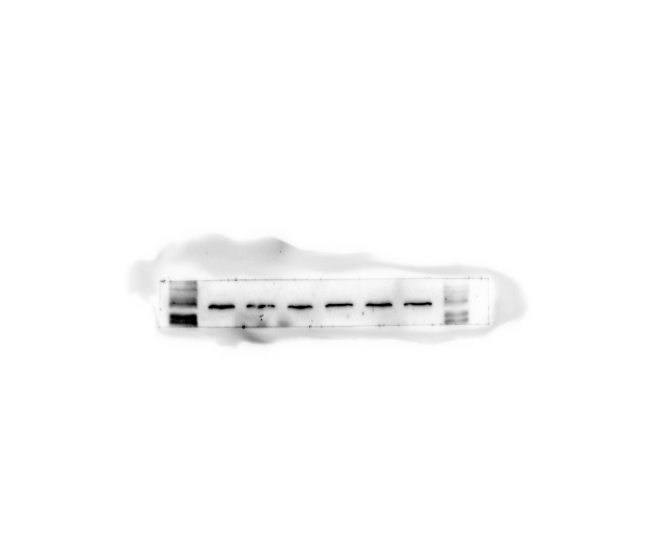

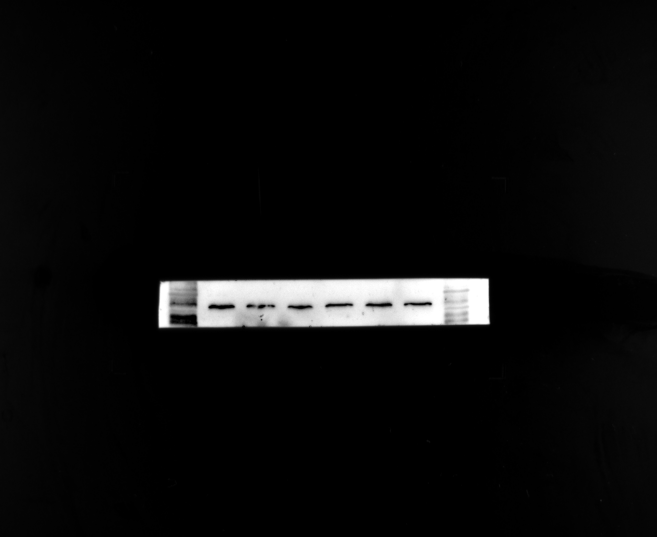


β-actin


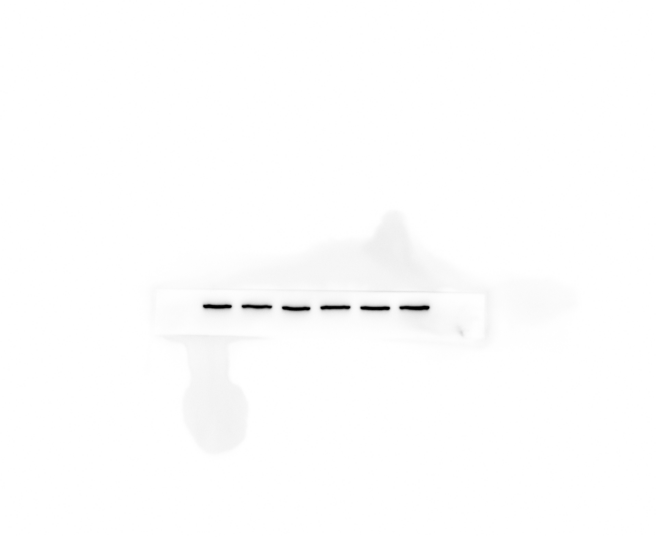

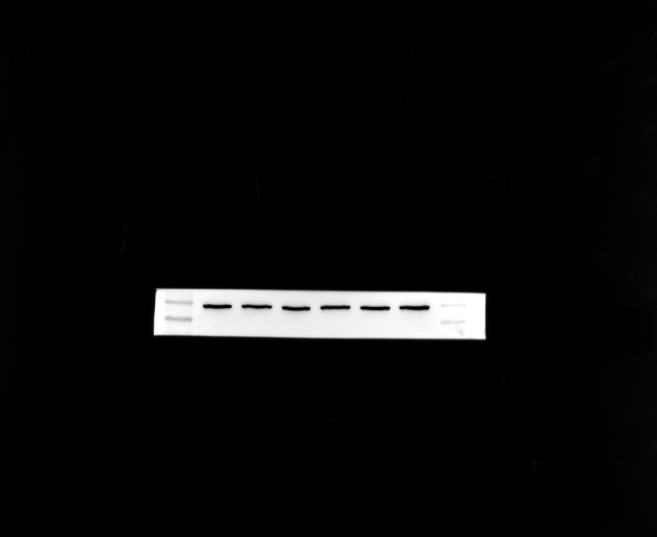

Supplement: WB.zip [file VEGFA.docx]

Relative protein expression levels of  
YAP1/ $\beta$ -actin

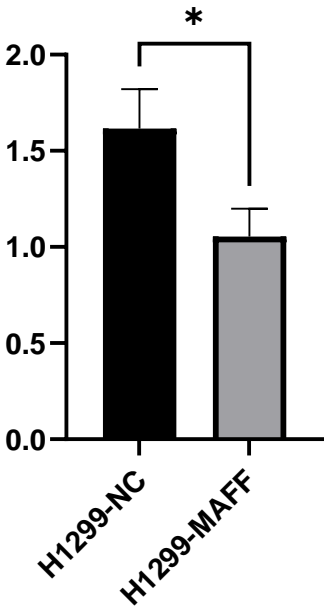

Supplement: WB.zip [file YAP1.pdf › WB/H1299/YAP1.pdf]

Repeat 1

YAP1


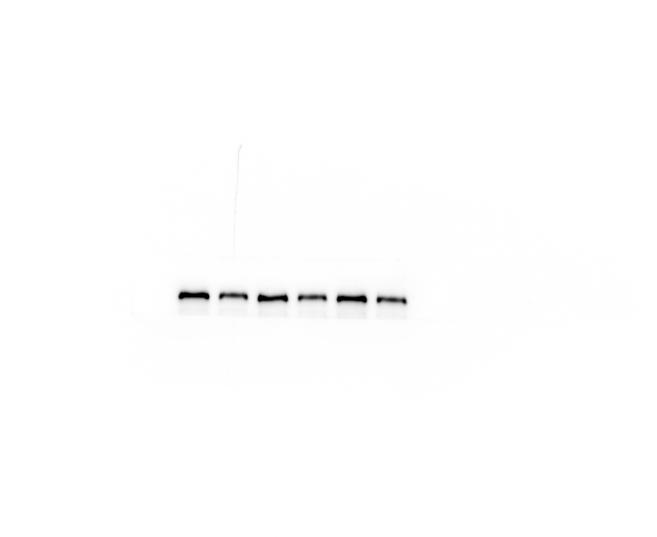

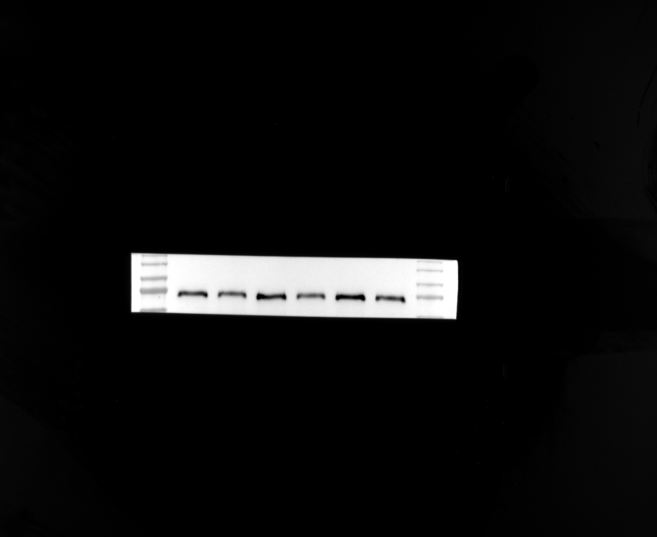


β-actin


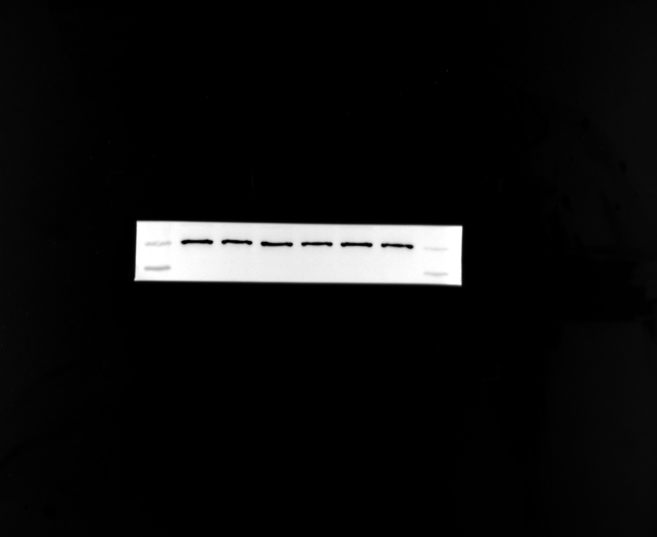

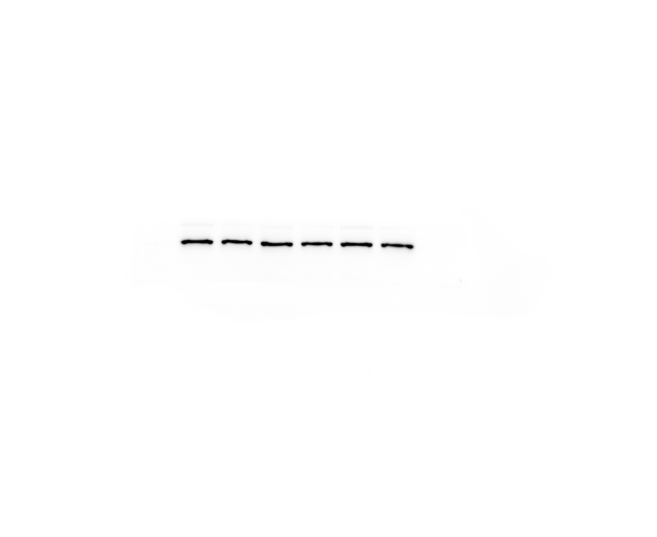


Repeat 2

YAP1


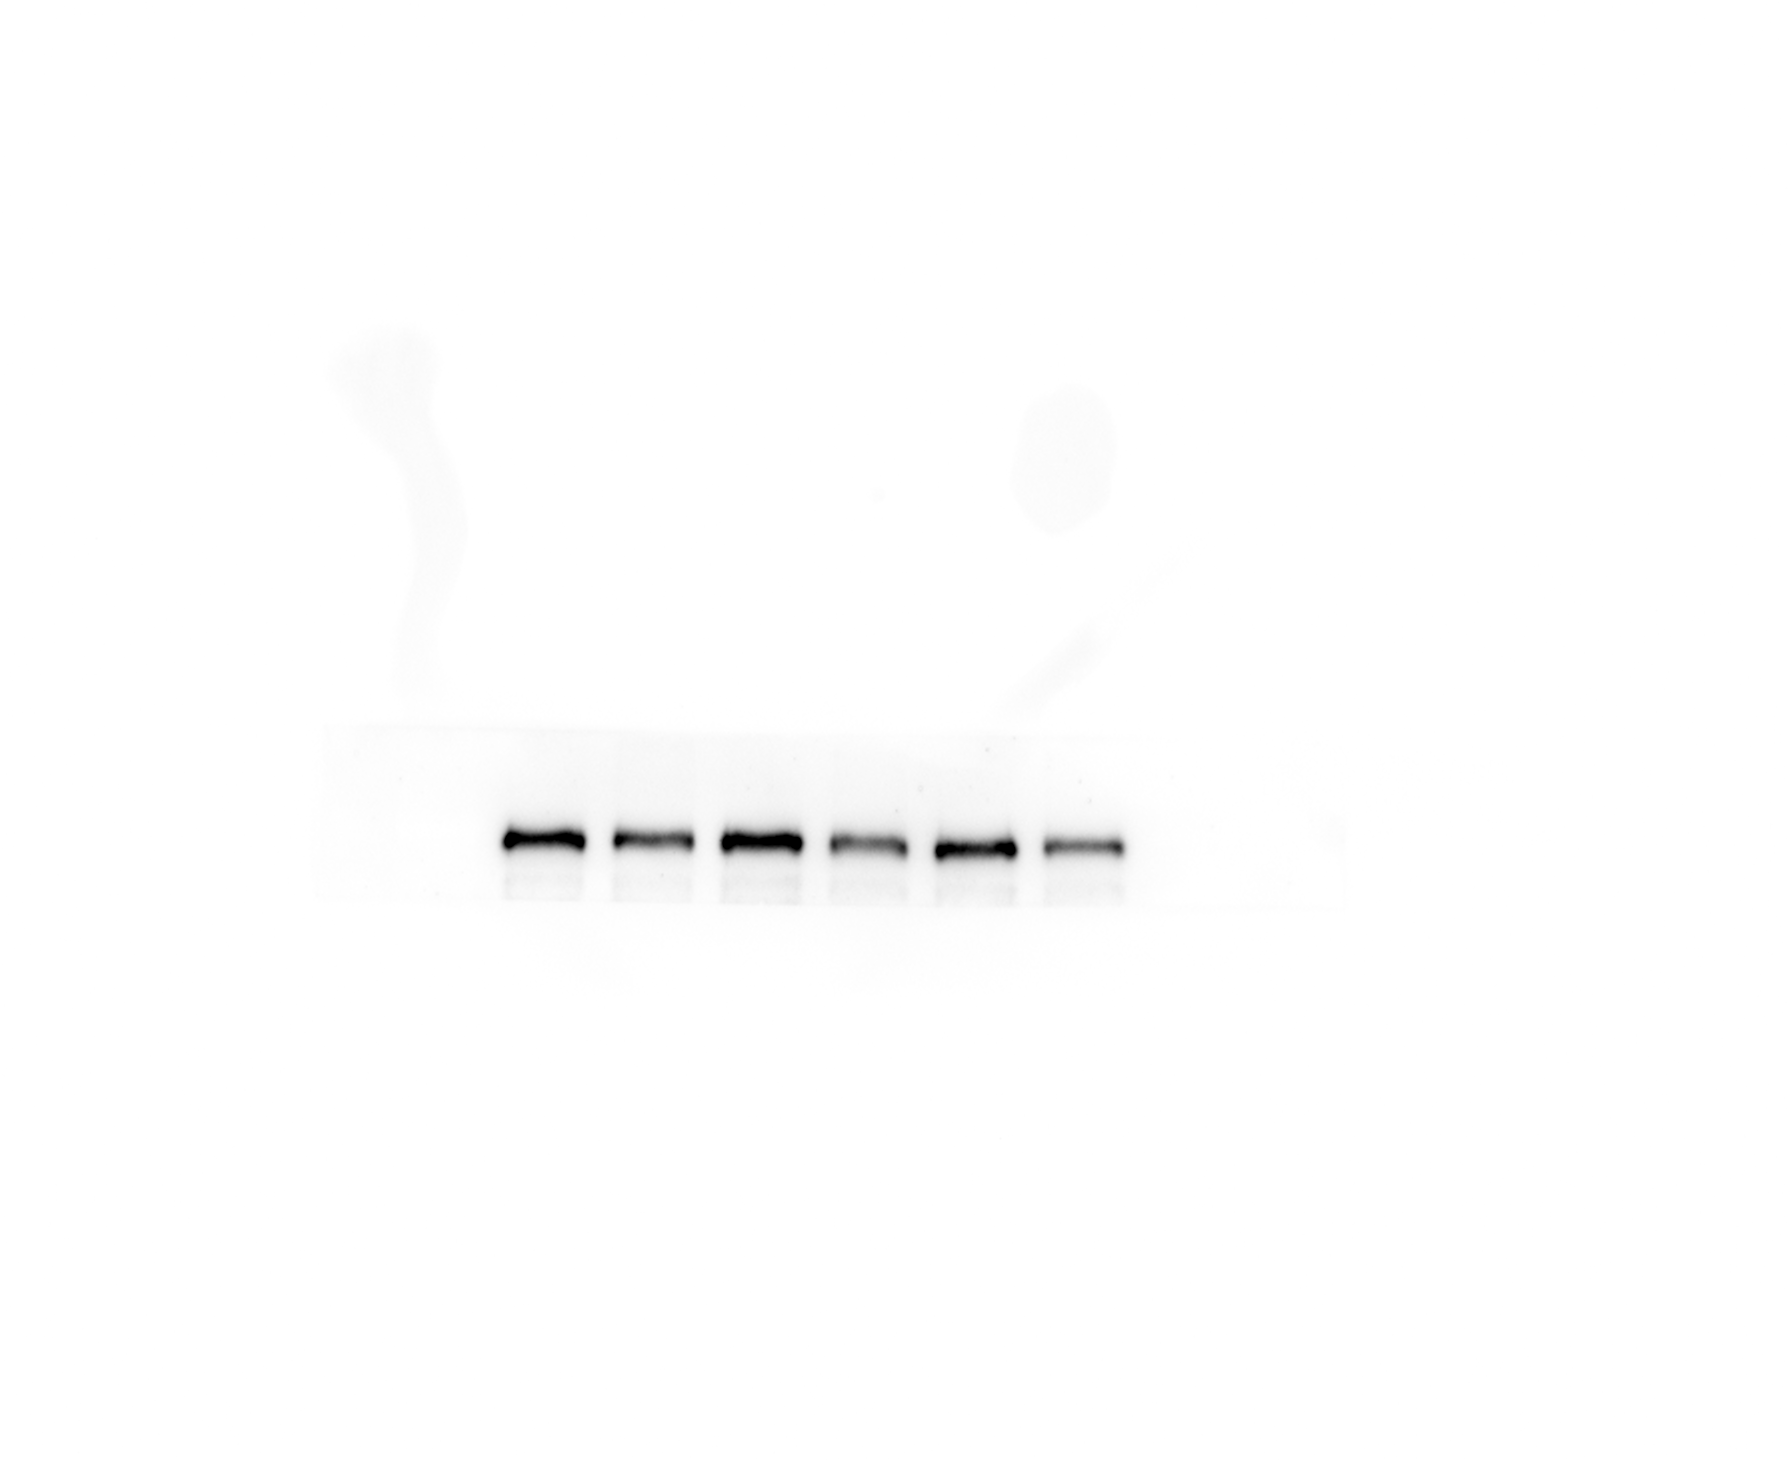

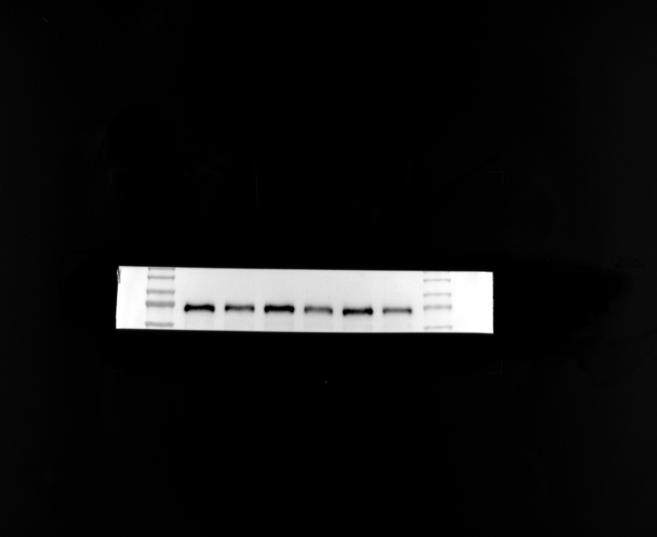


β-actin


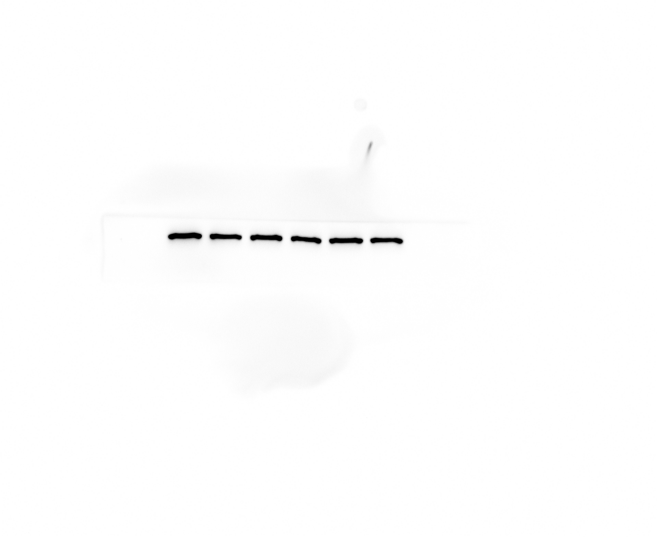

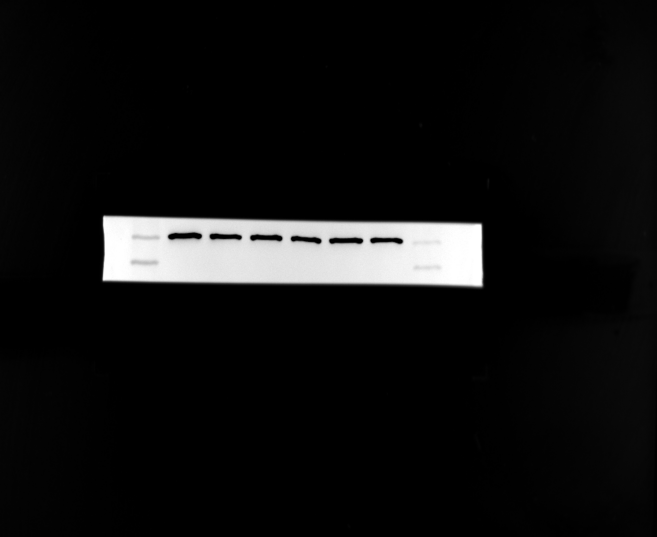


Repeat 3

YAP1


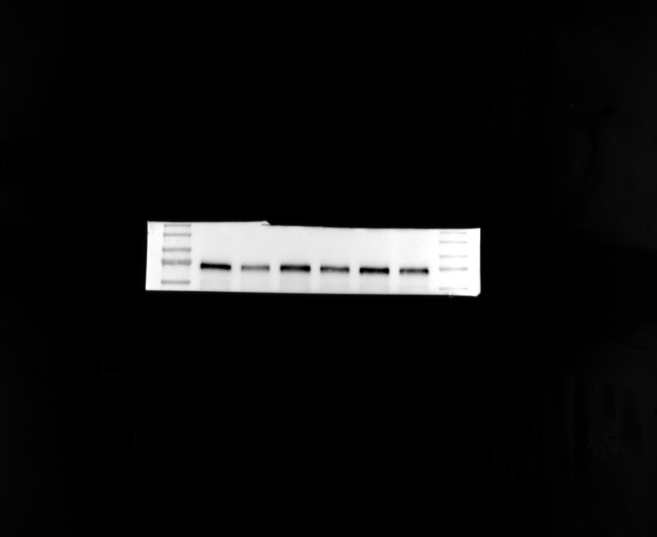

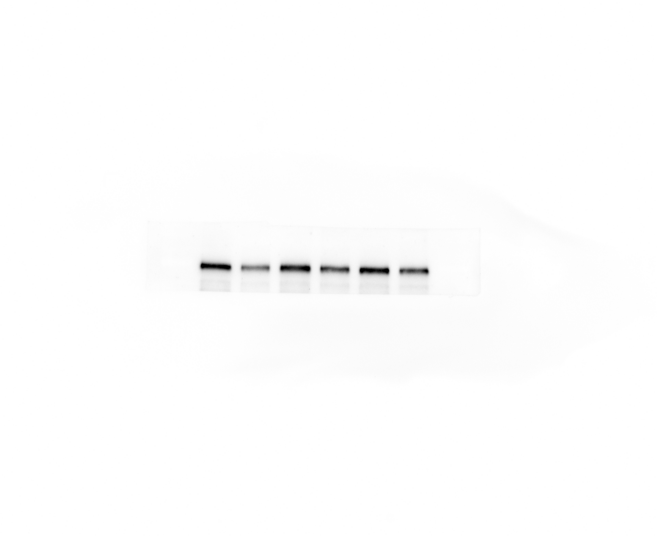


β-actin


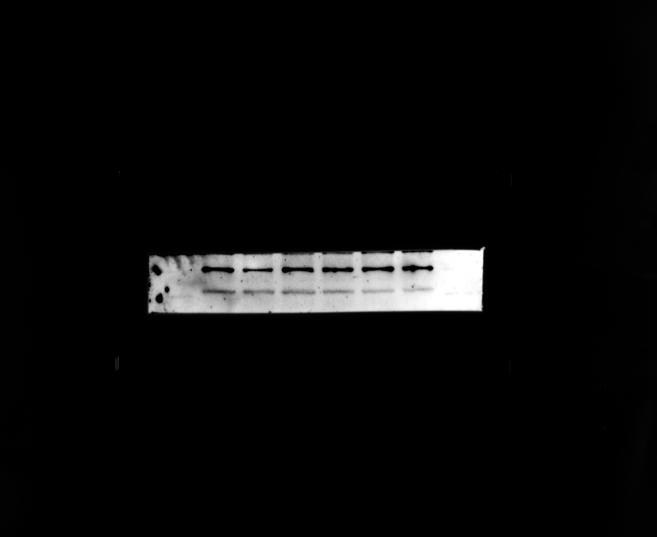

Supplement: WB.zip [file YAP1.docx]

Repeat 1

CTGF


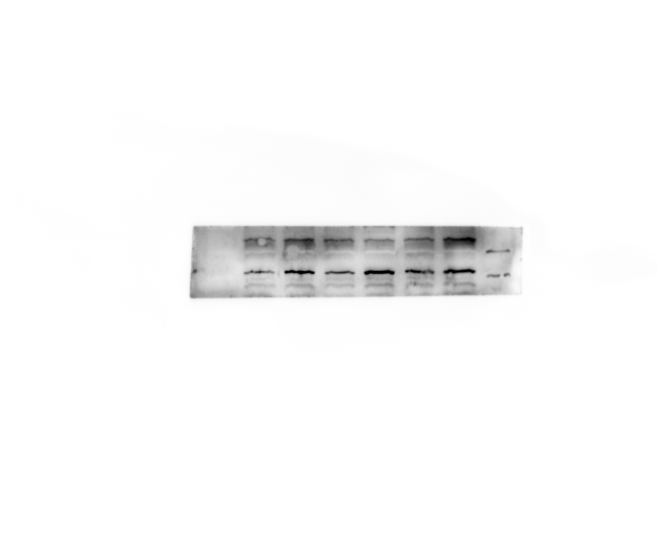

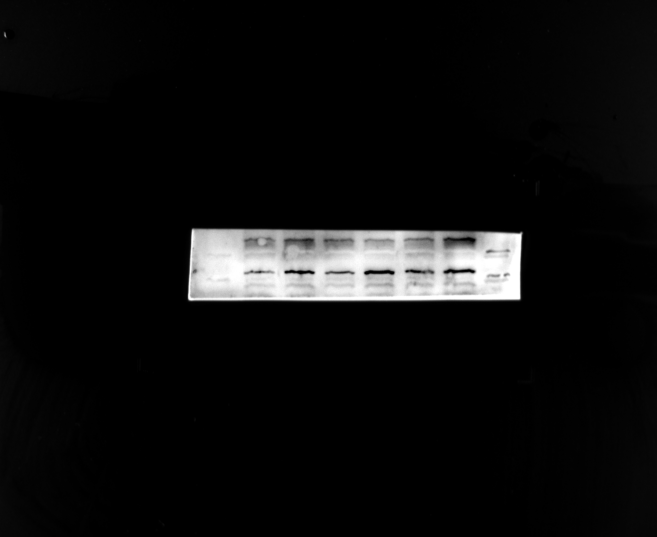


β-actin


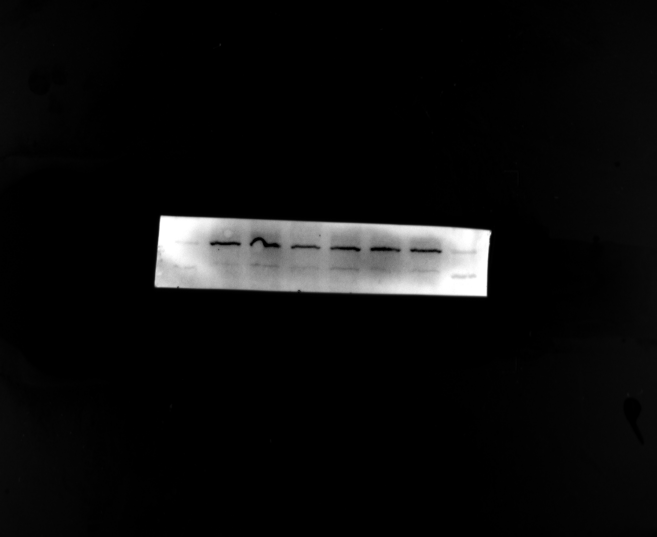


Repeat 2

CTGF


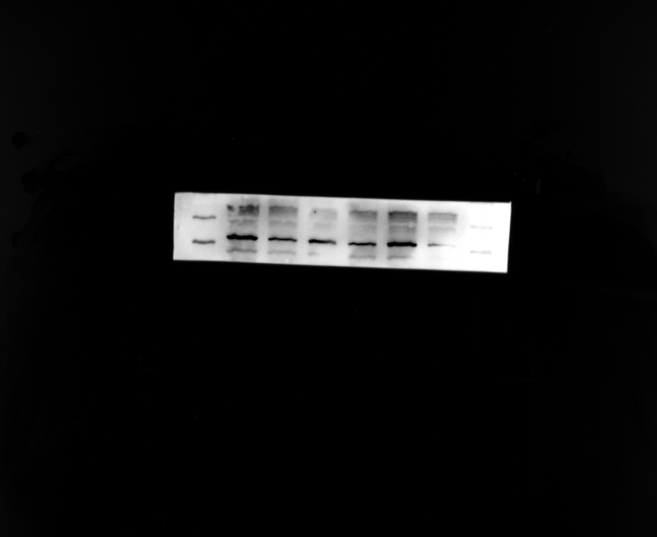


β-actin


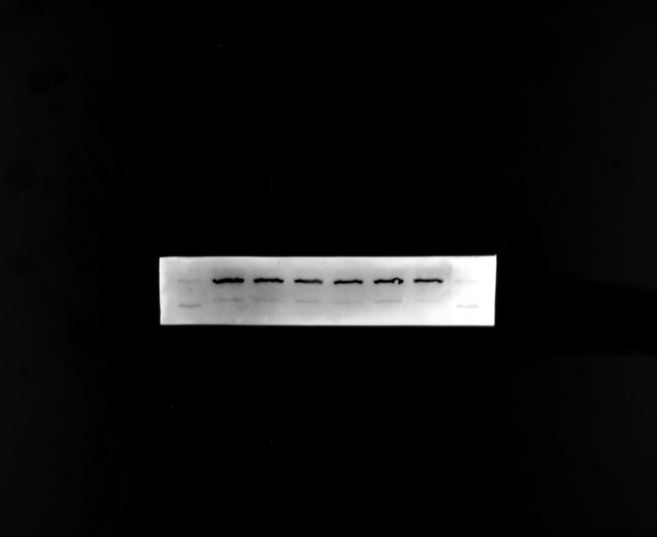

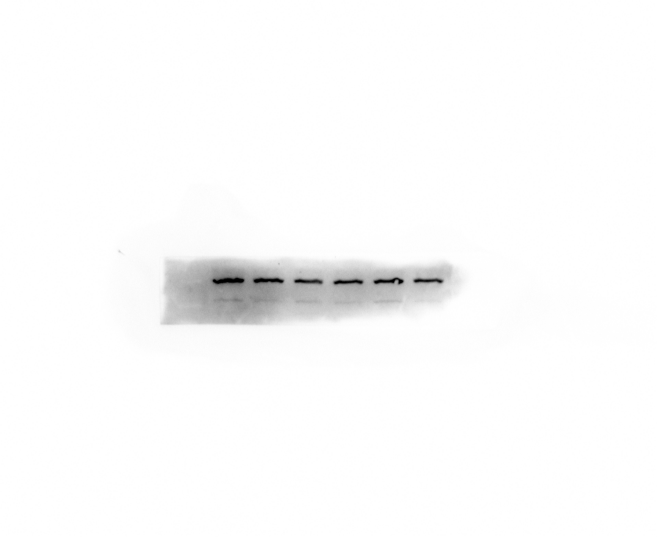


Repeat 3

CTGF


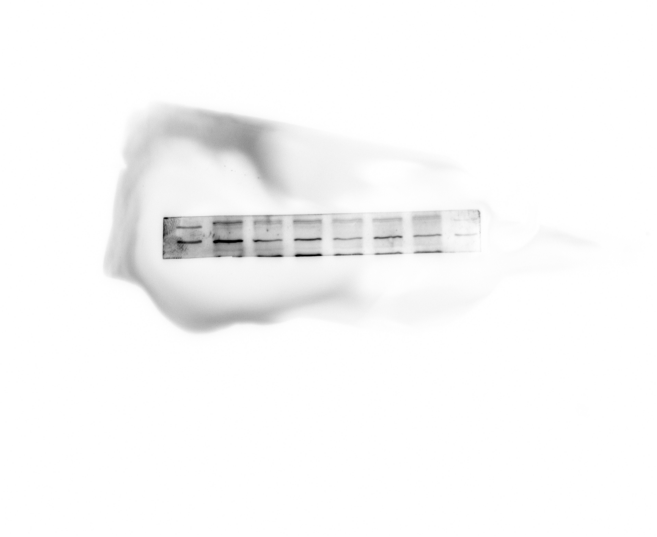

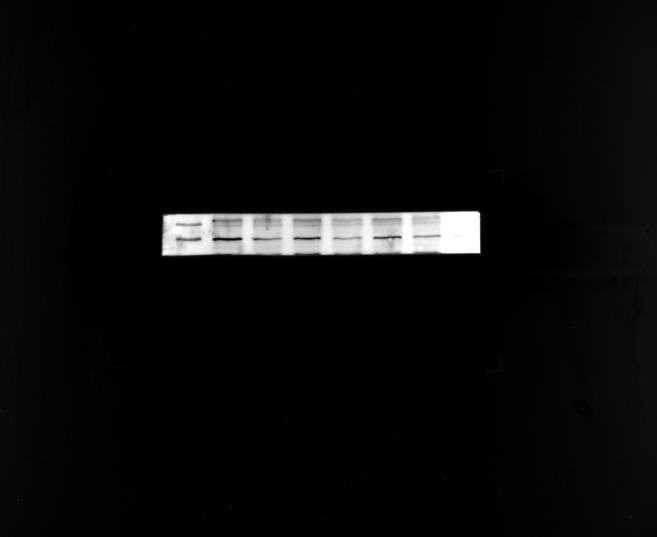


β-actin


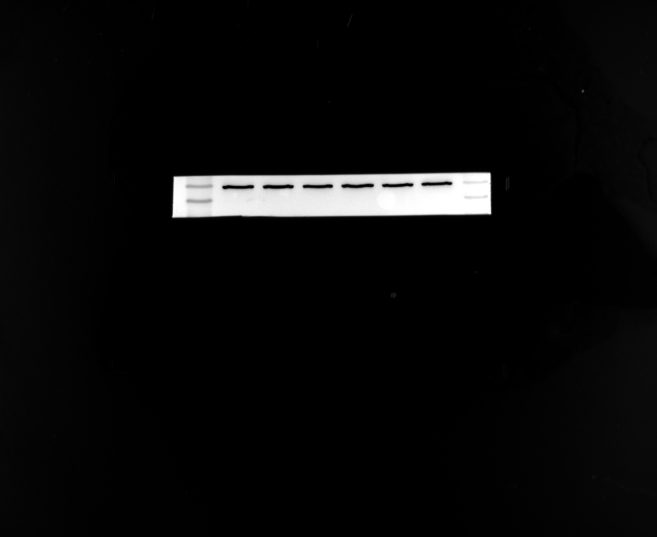

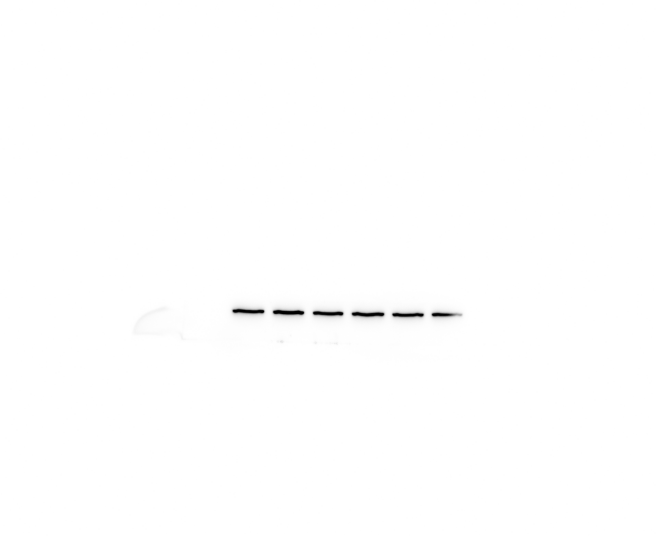

Supplement: WB.zip [file CTGF.docx]

Repeat 1

MAFF


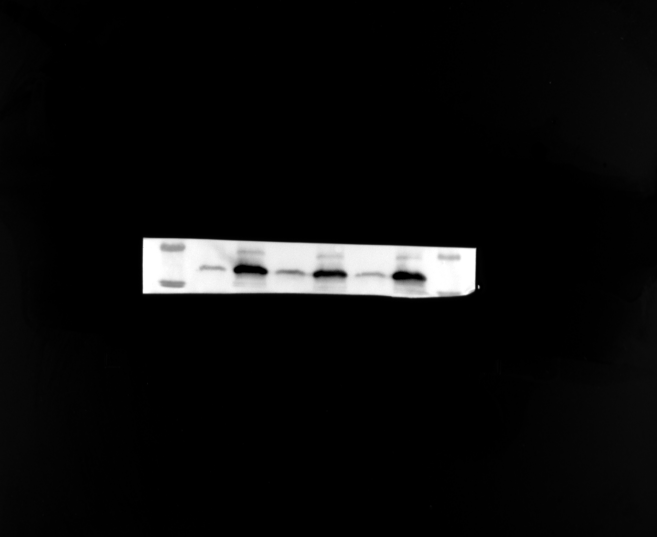

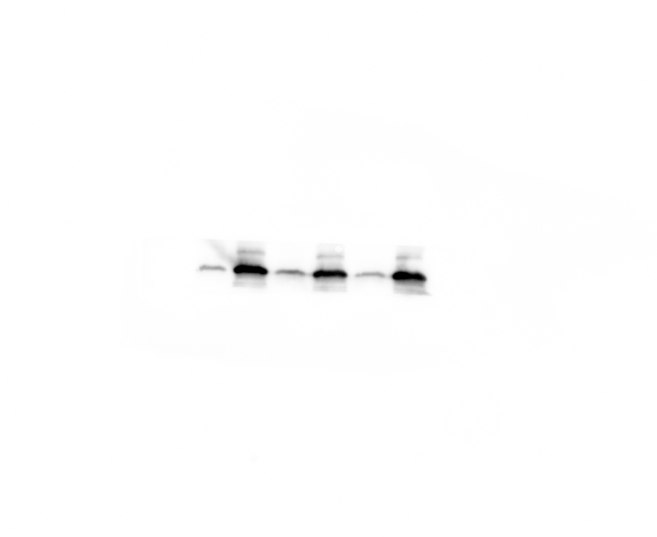


β-actin


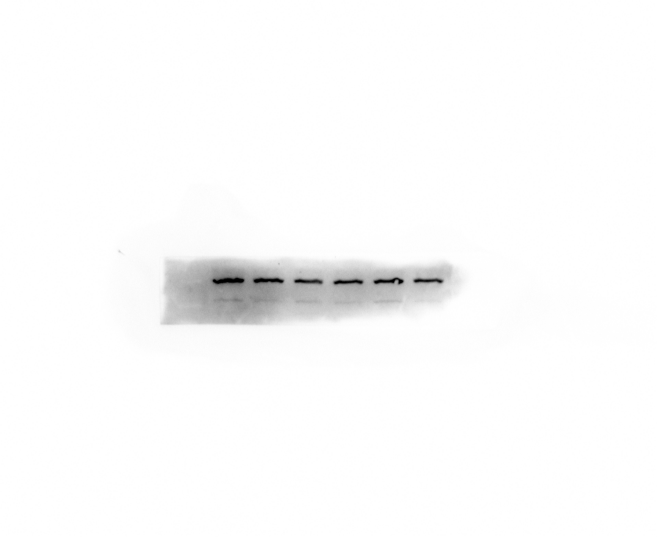

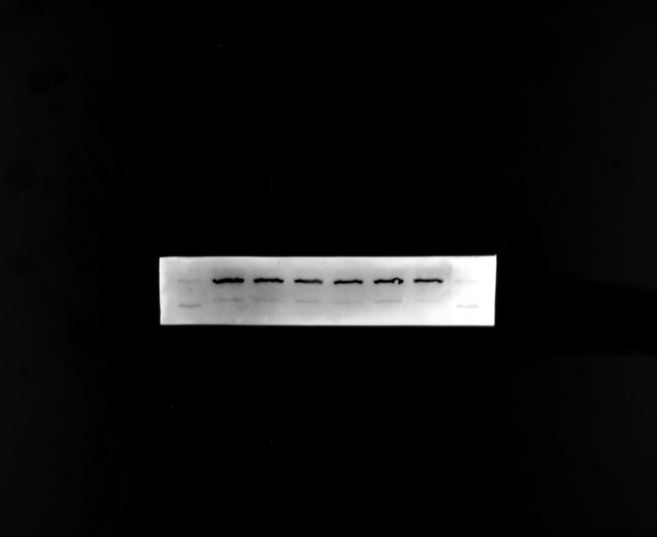


Repeat 2

MAFF


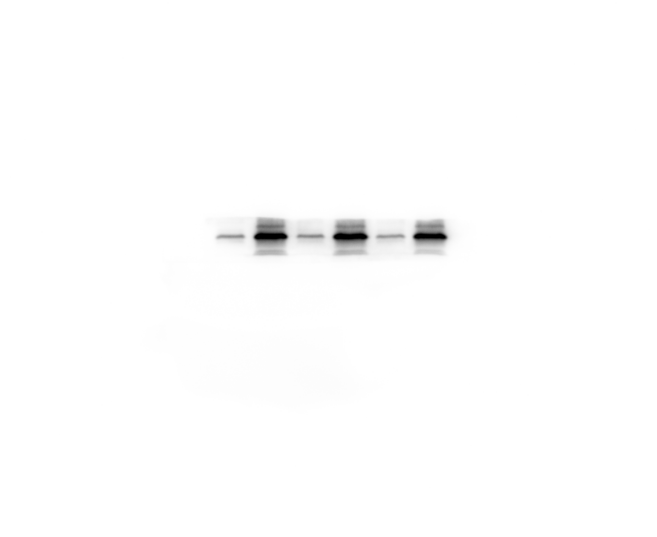

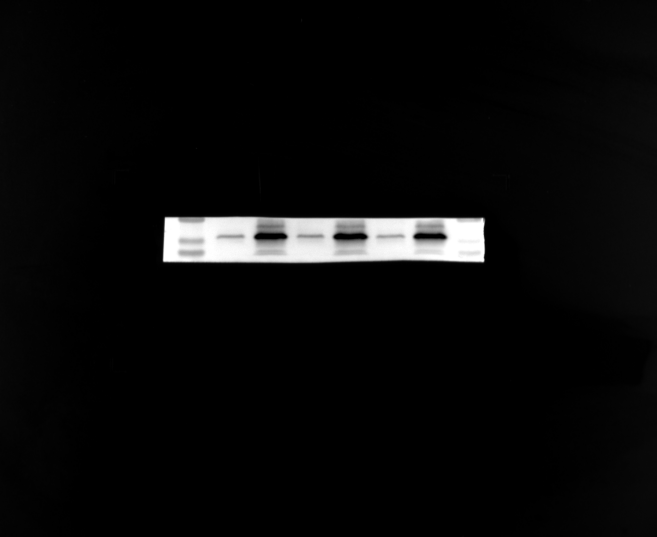


β-actin


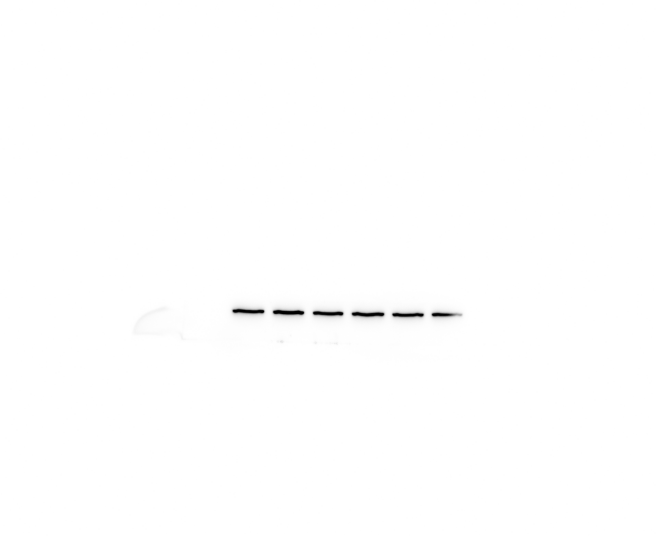

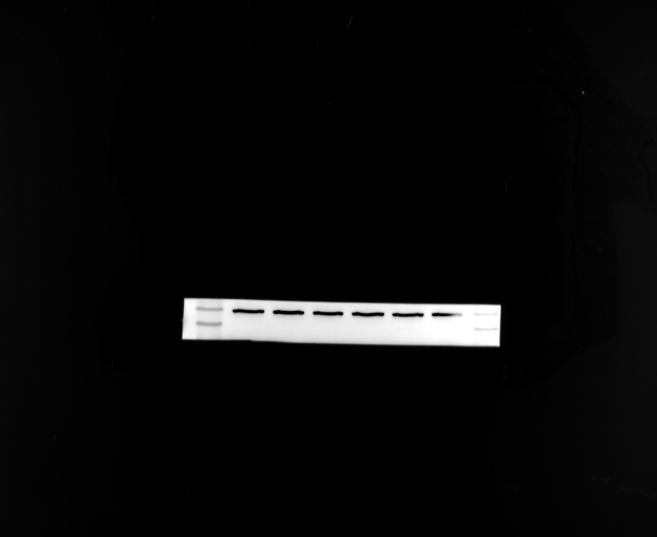


Repeat 3

MAFF


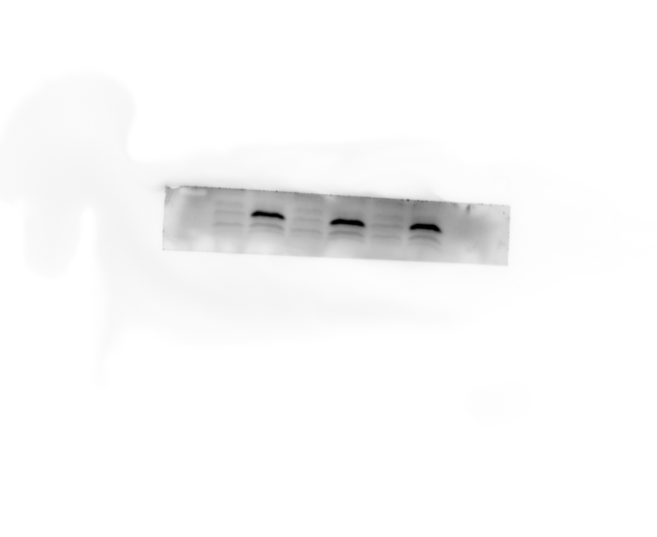

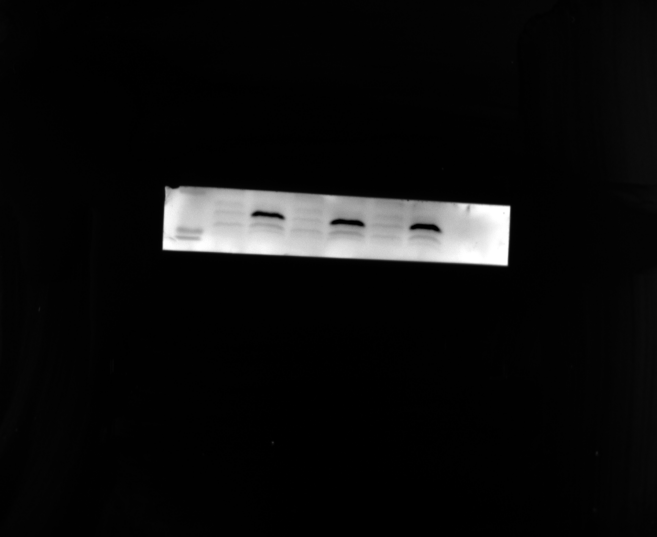


β-actin


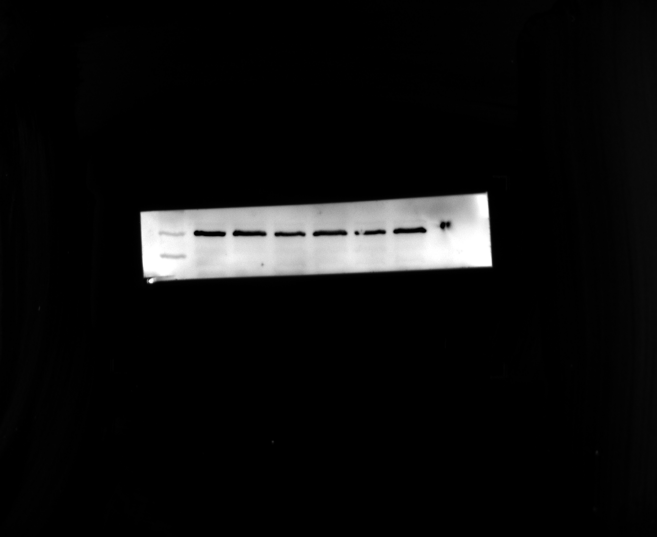

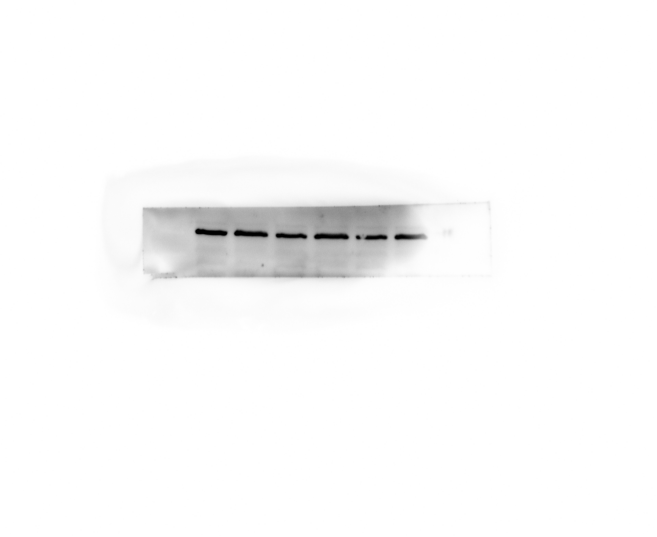

Supplement: WB.zip [file MAFF.docx]

Repeat 1

VEGFA


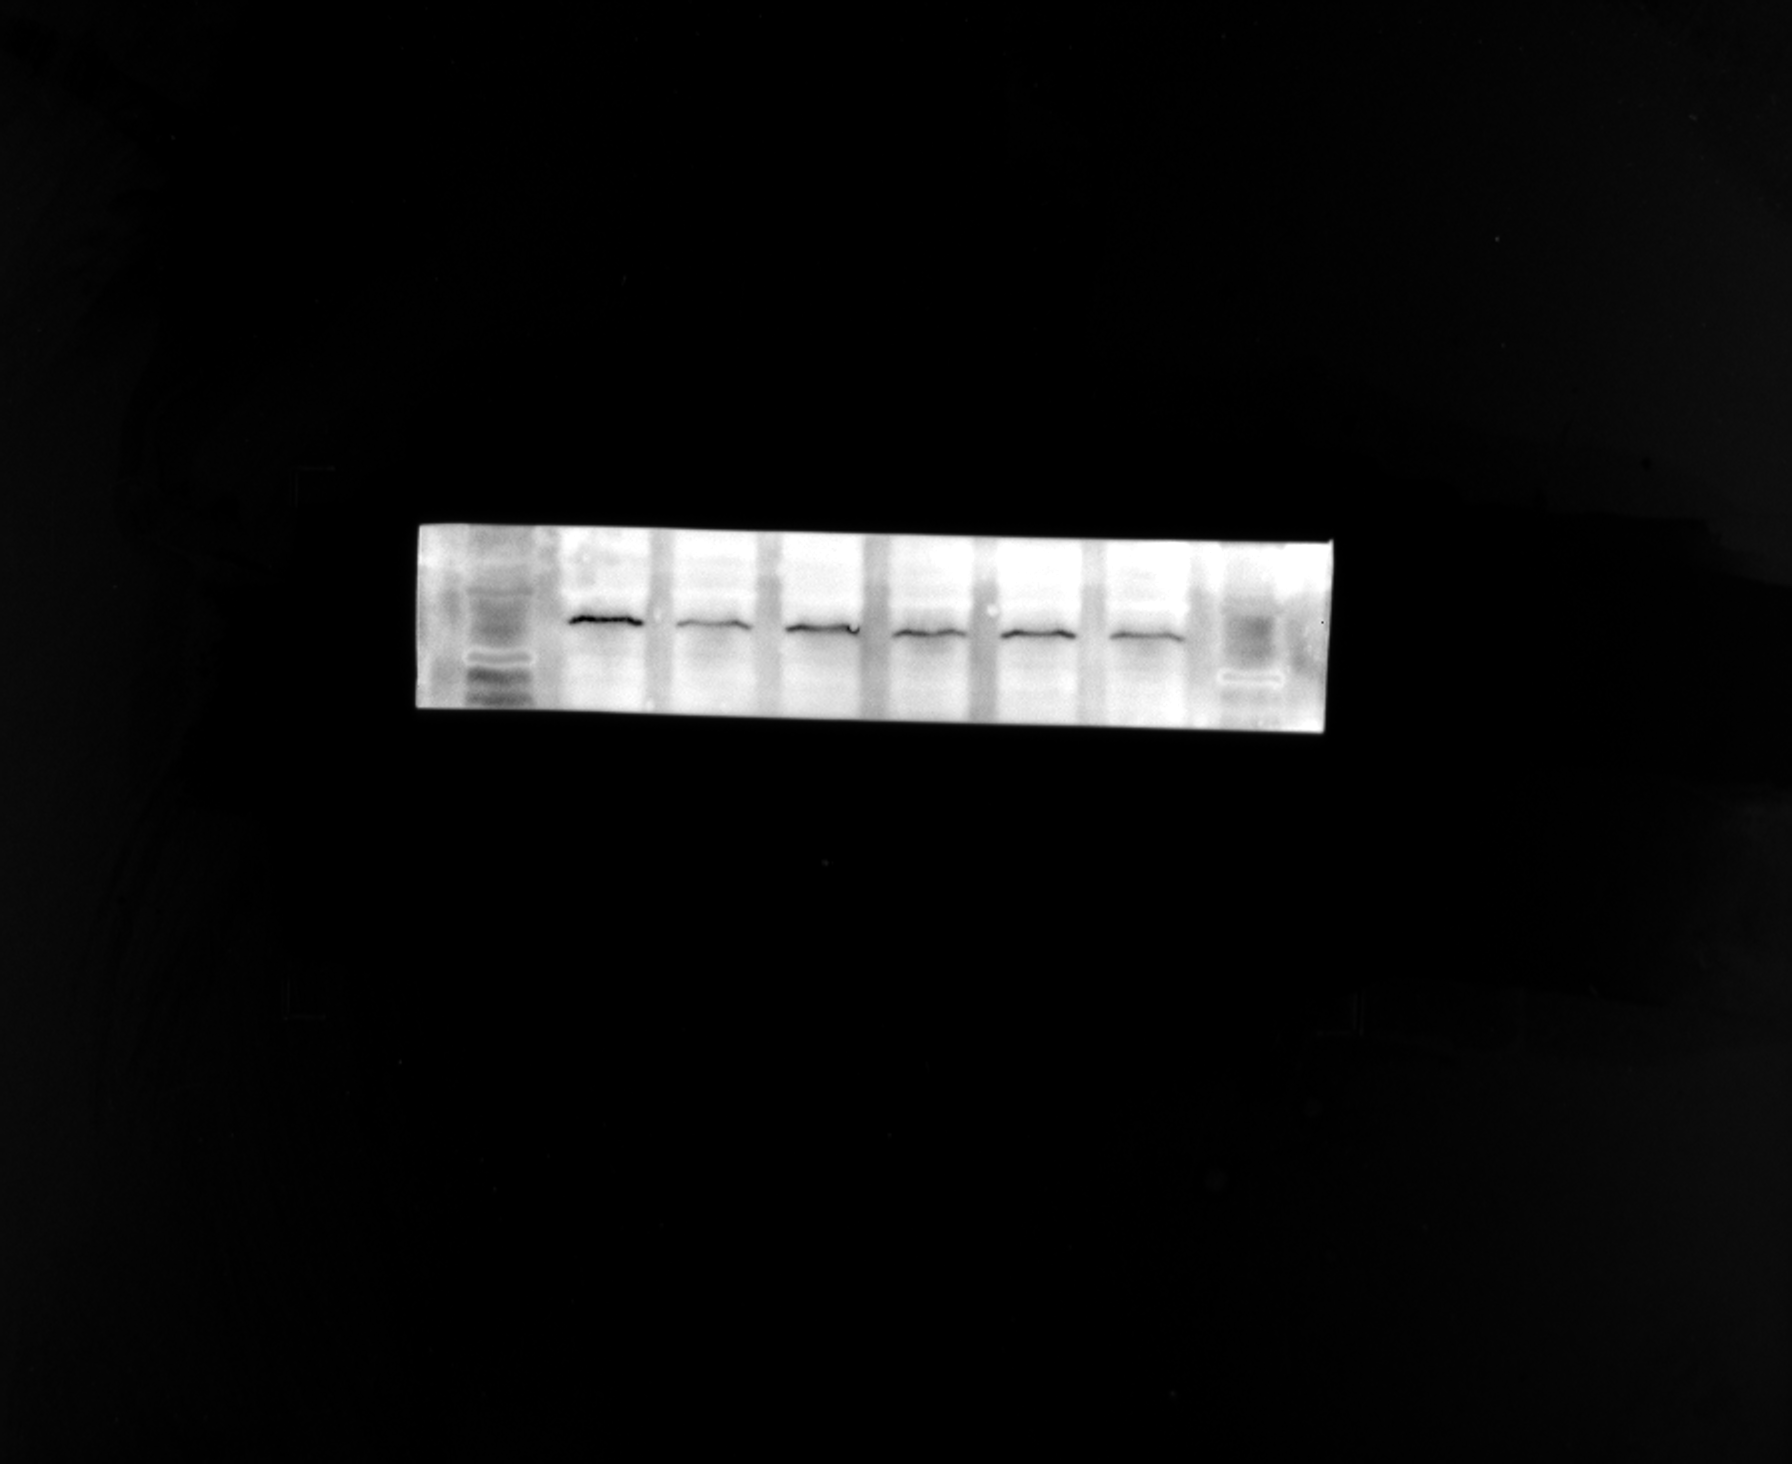

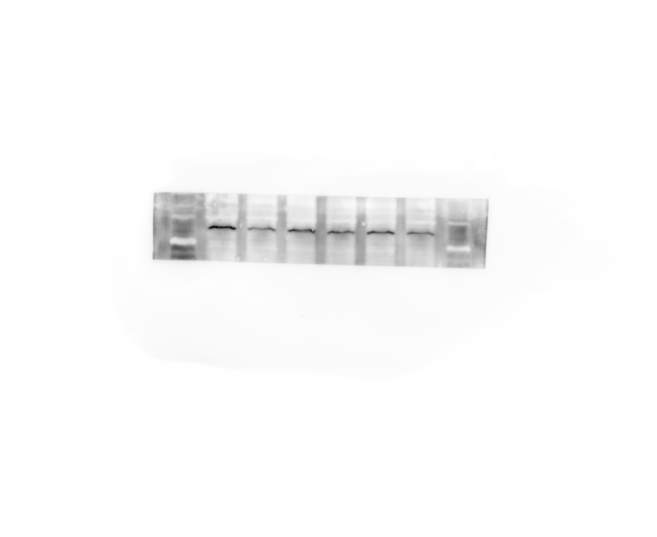


β-actin


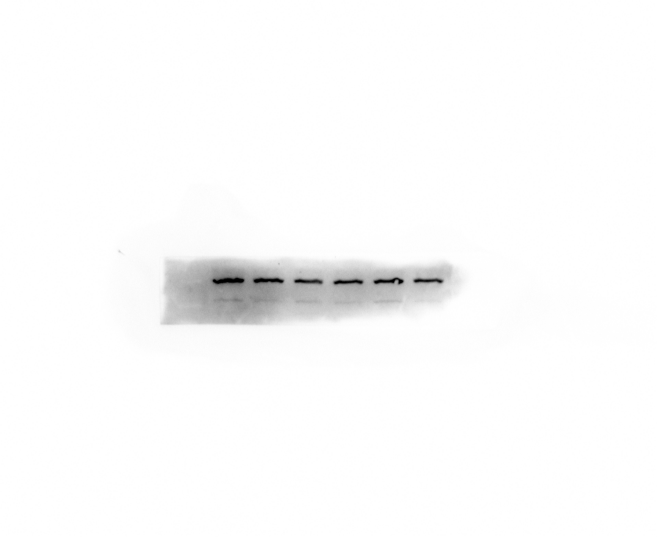


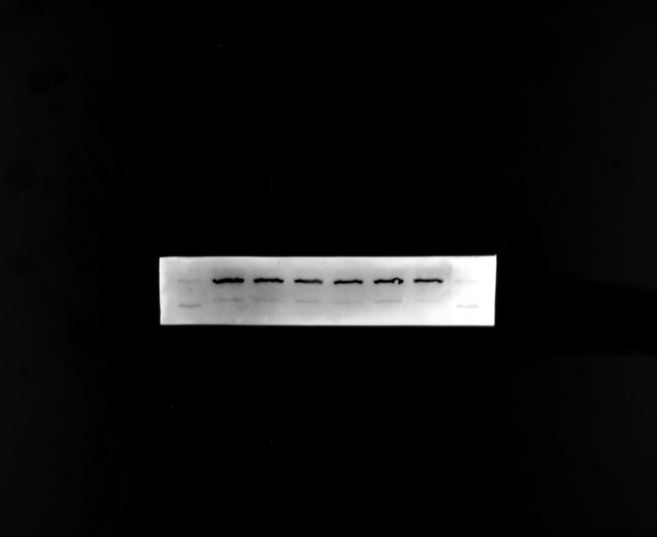


Repeat 2

VEGFFA


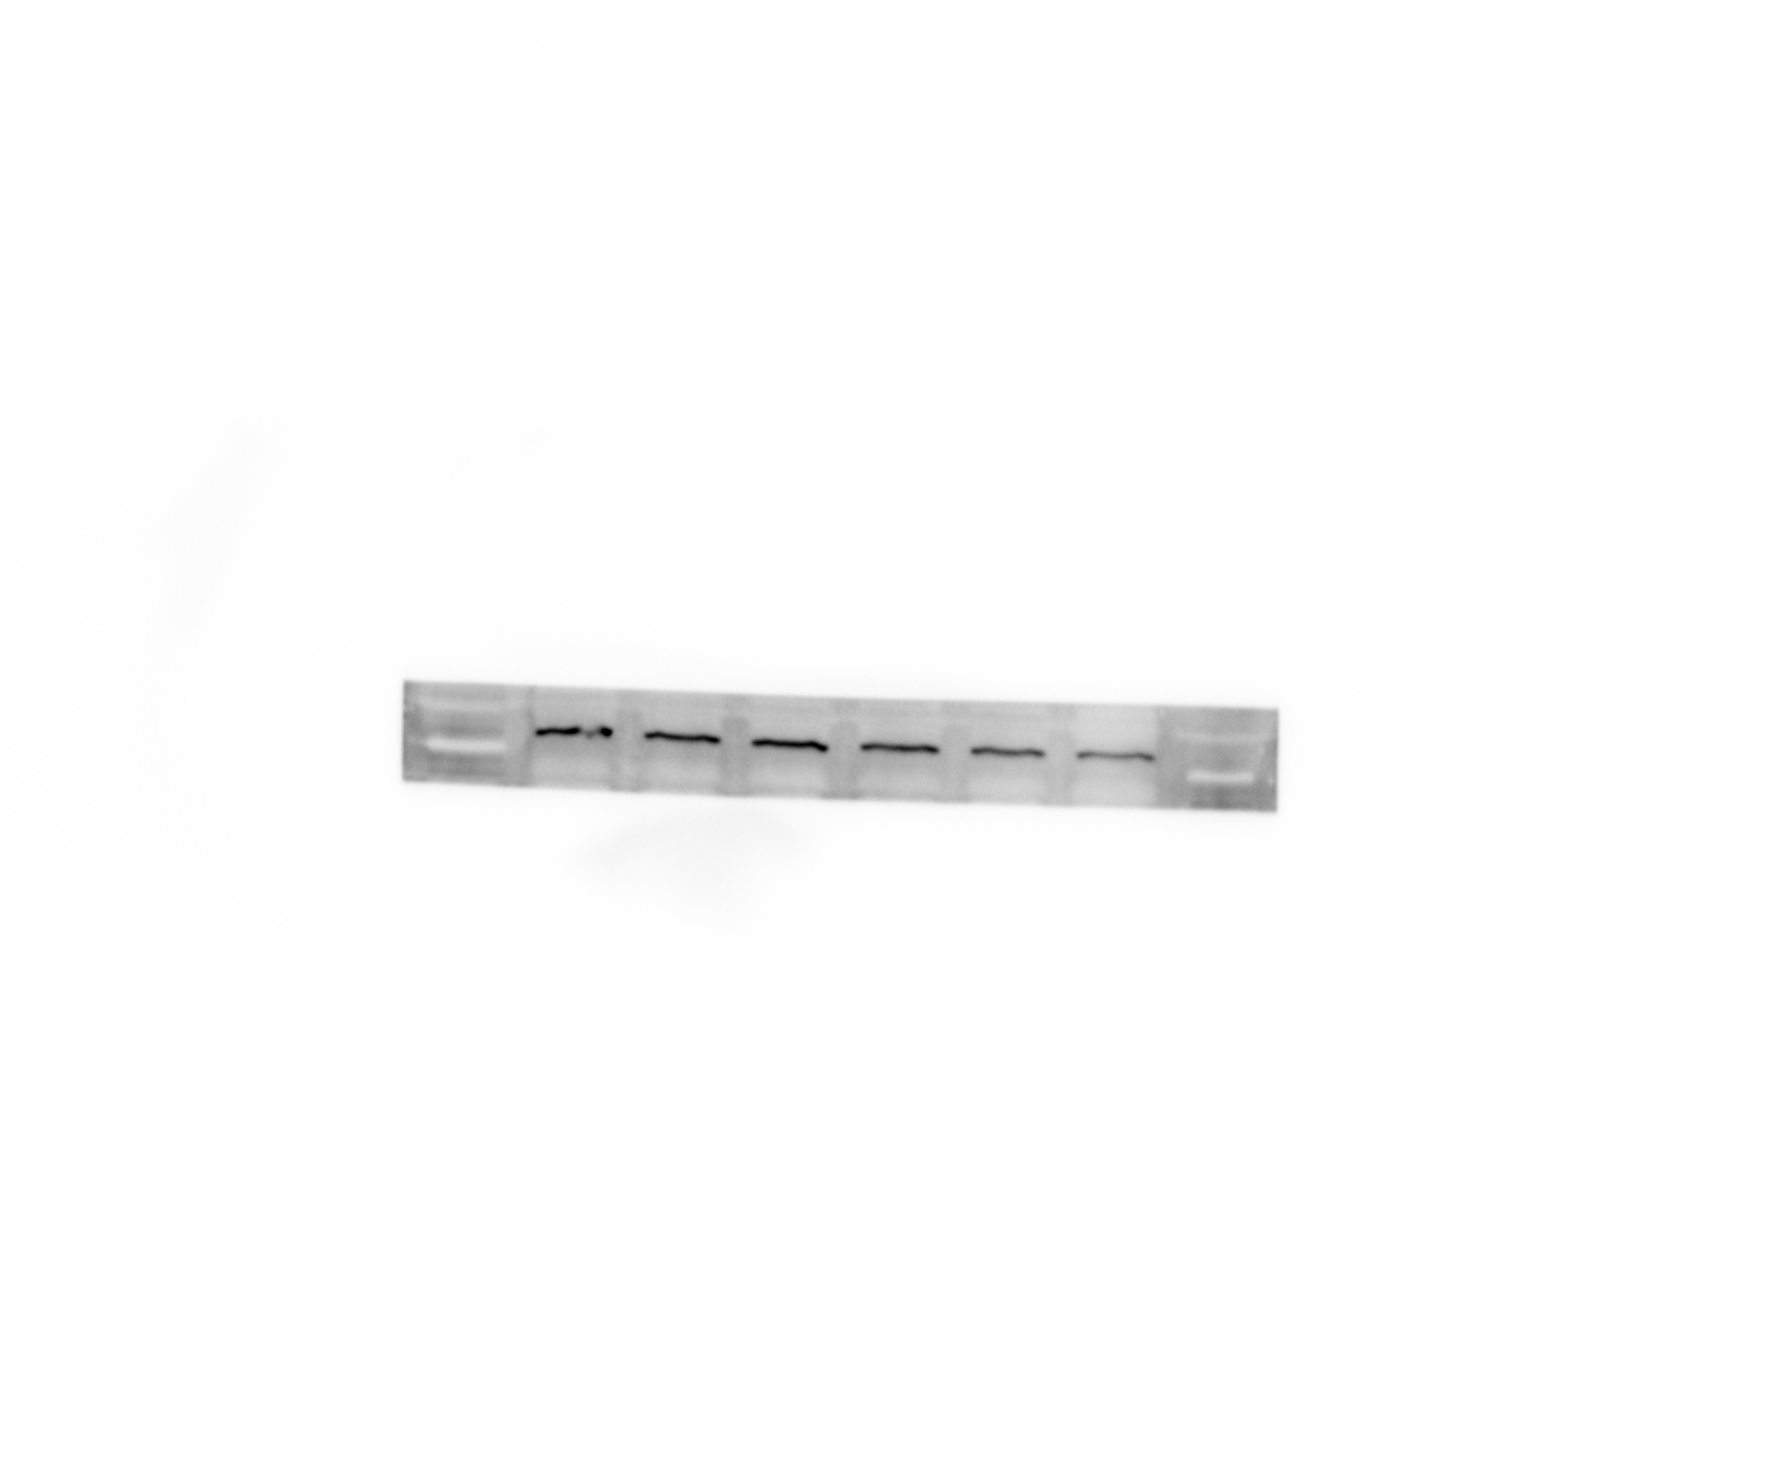

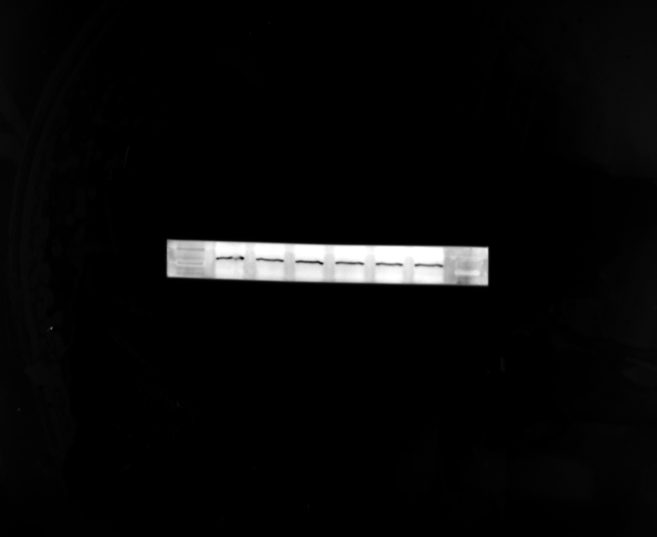


β-actin


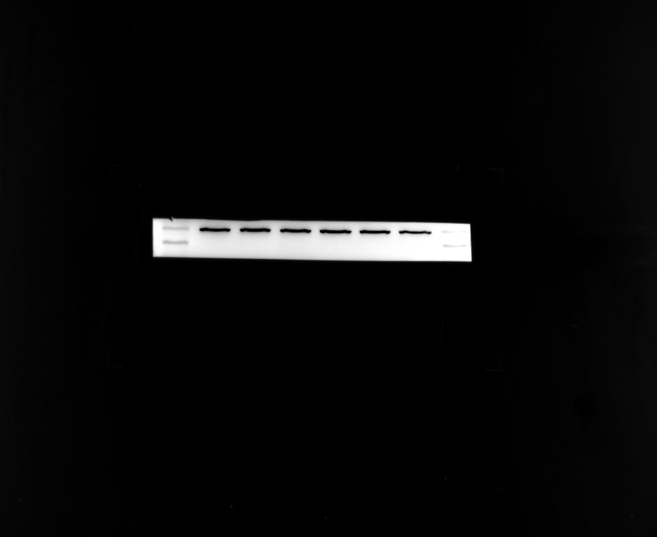


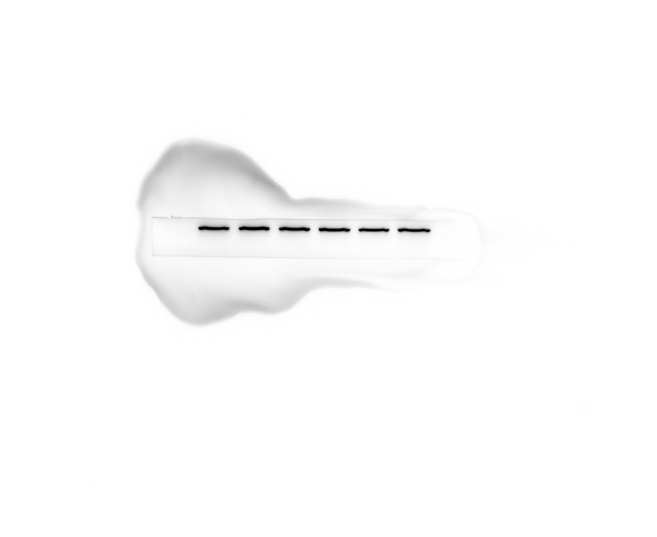


Repeat 3

VEGFA


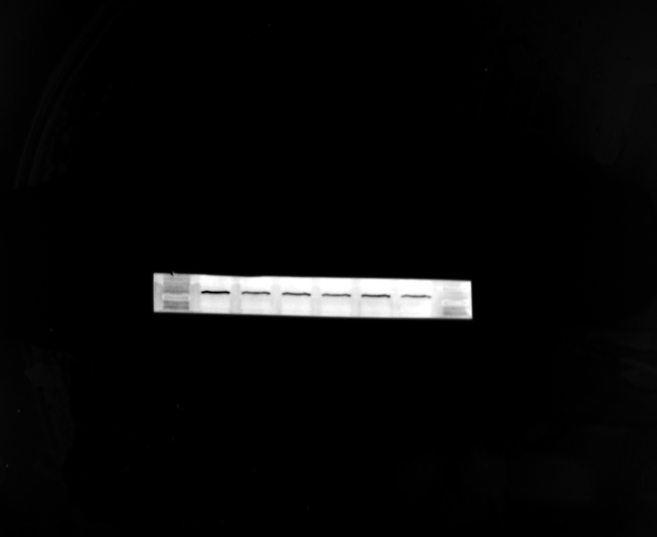

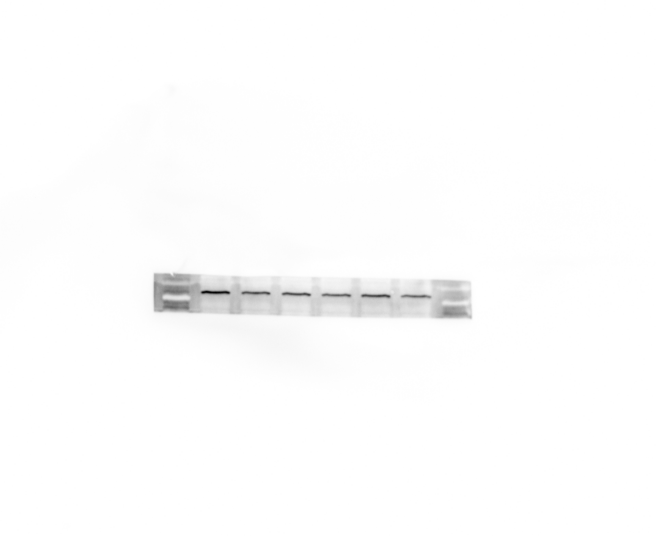


β-actin


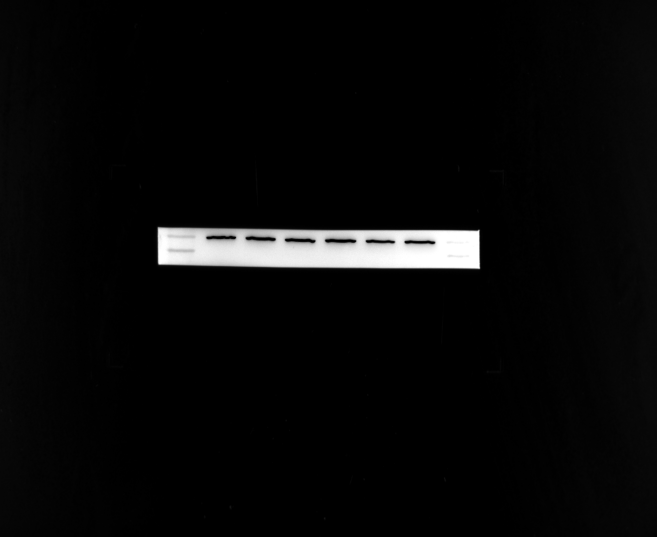

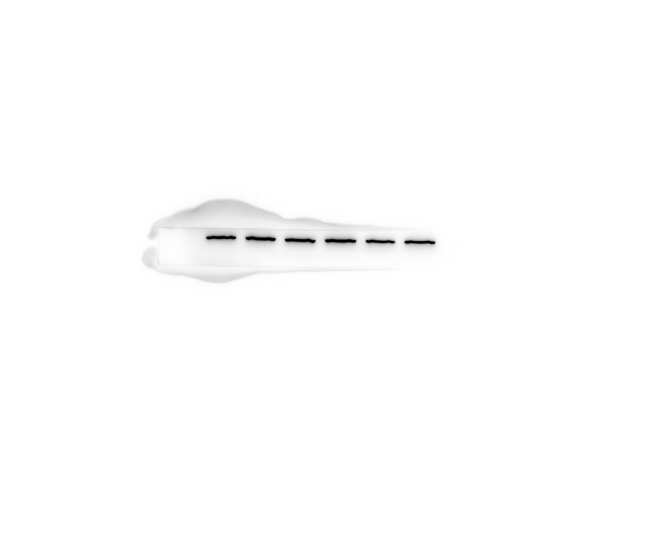

Supplement: WB.zip [file VEGFA.docx]

Repeat 1

YAP1


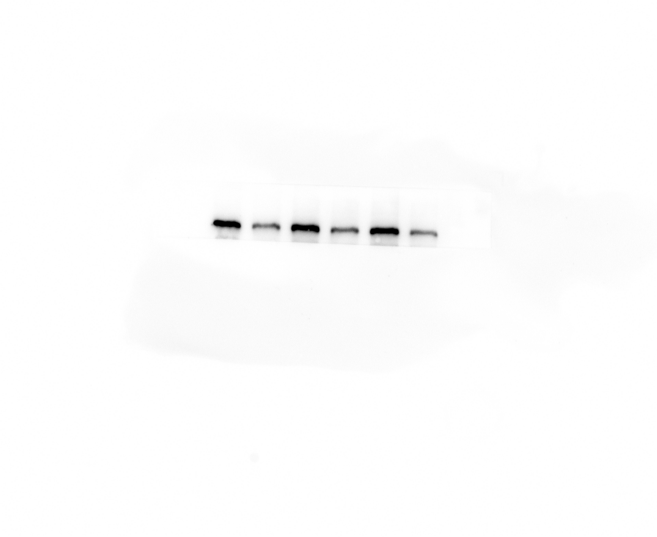

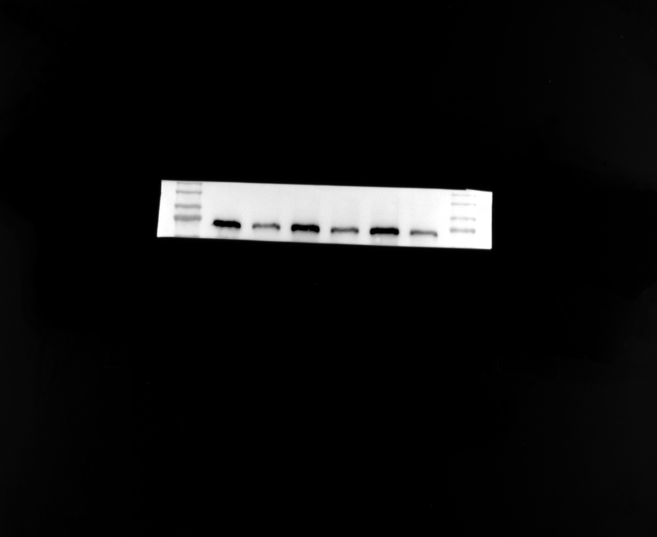


β-actin


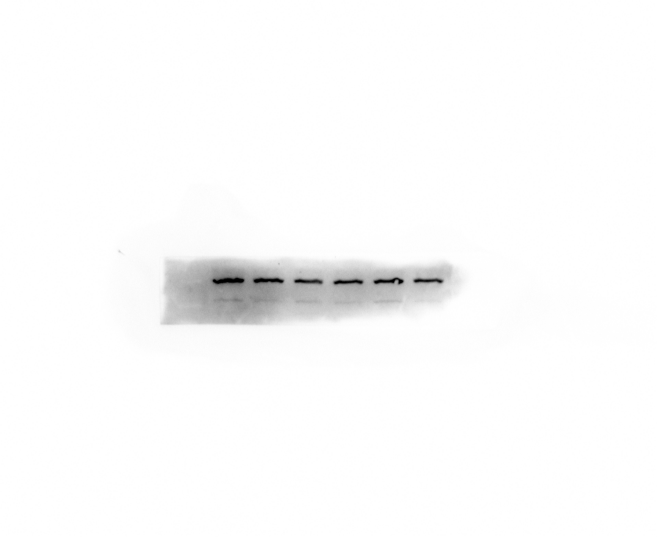

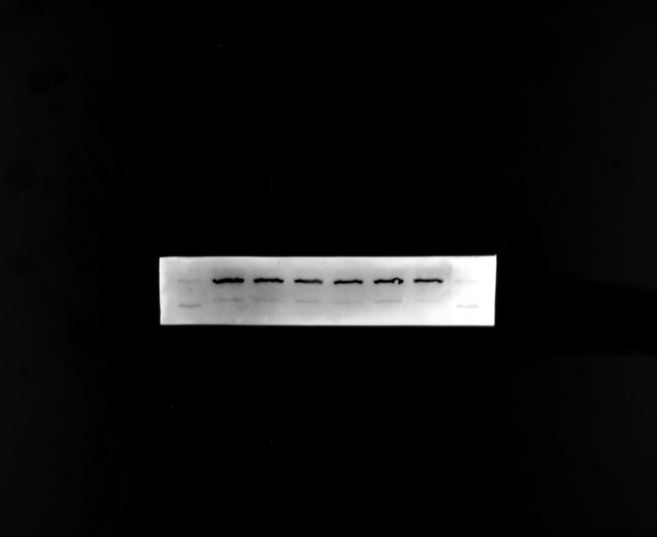


Repeat 2

YAP1


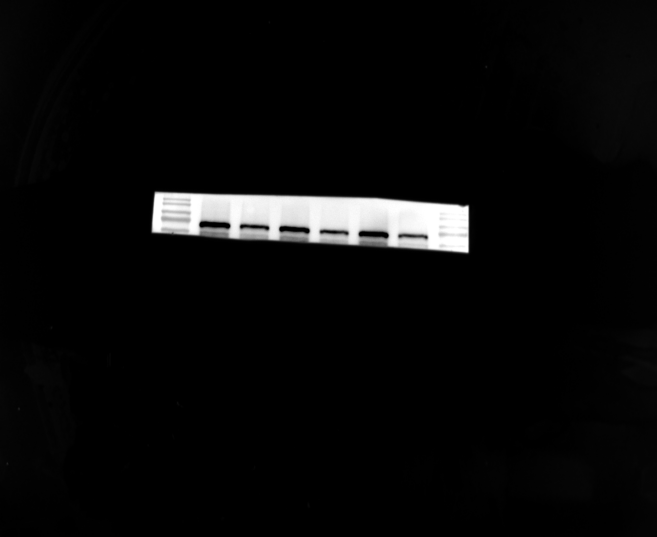

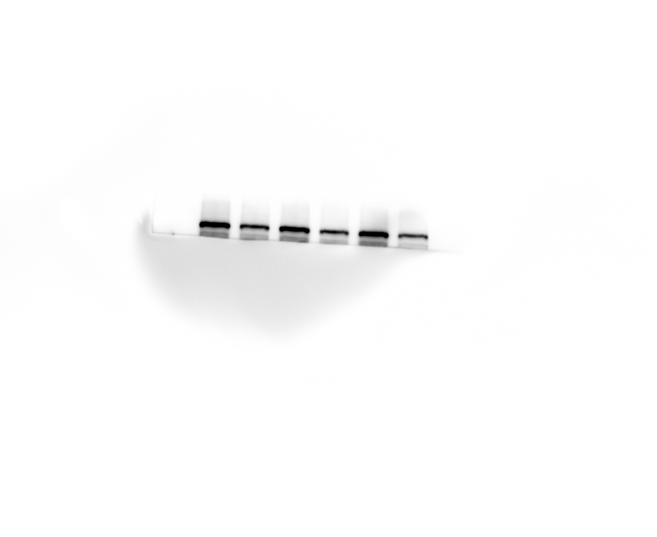


β-actin


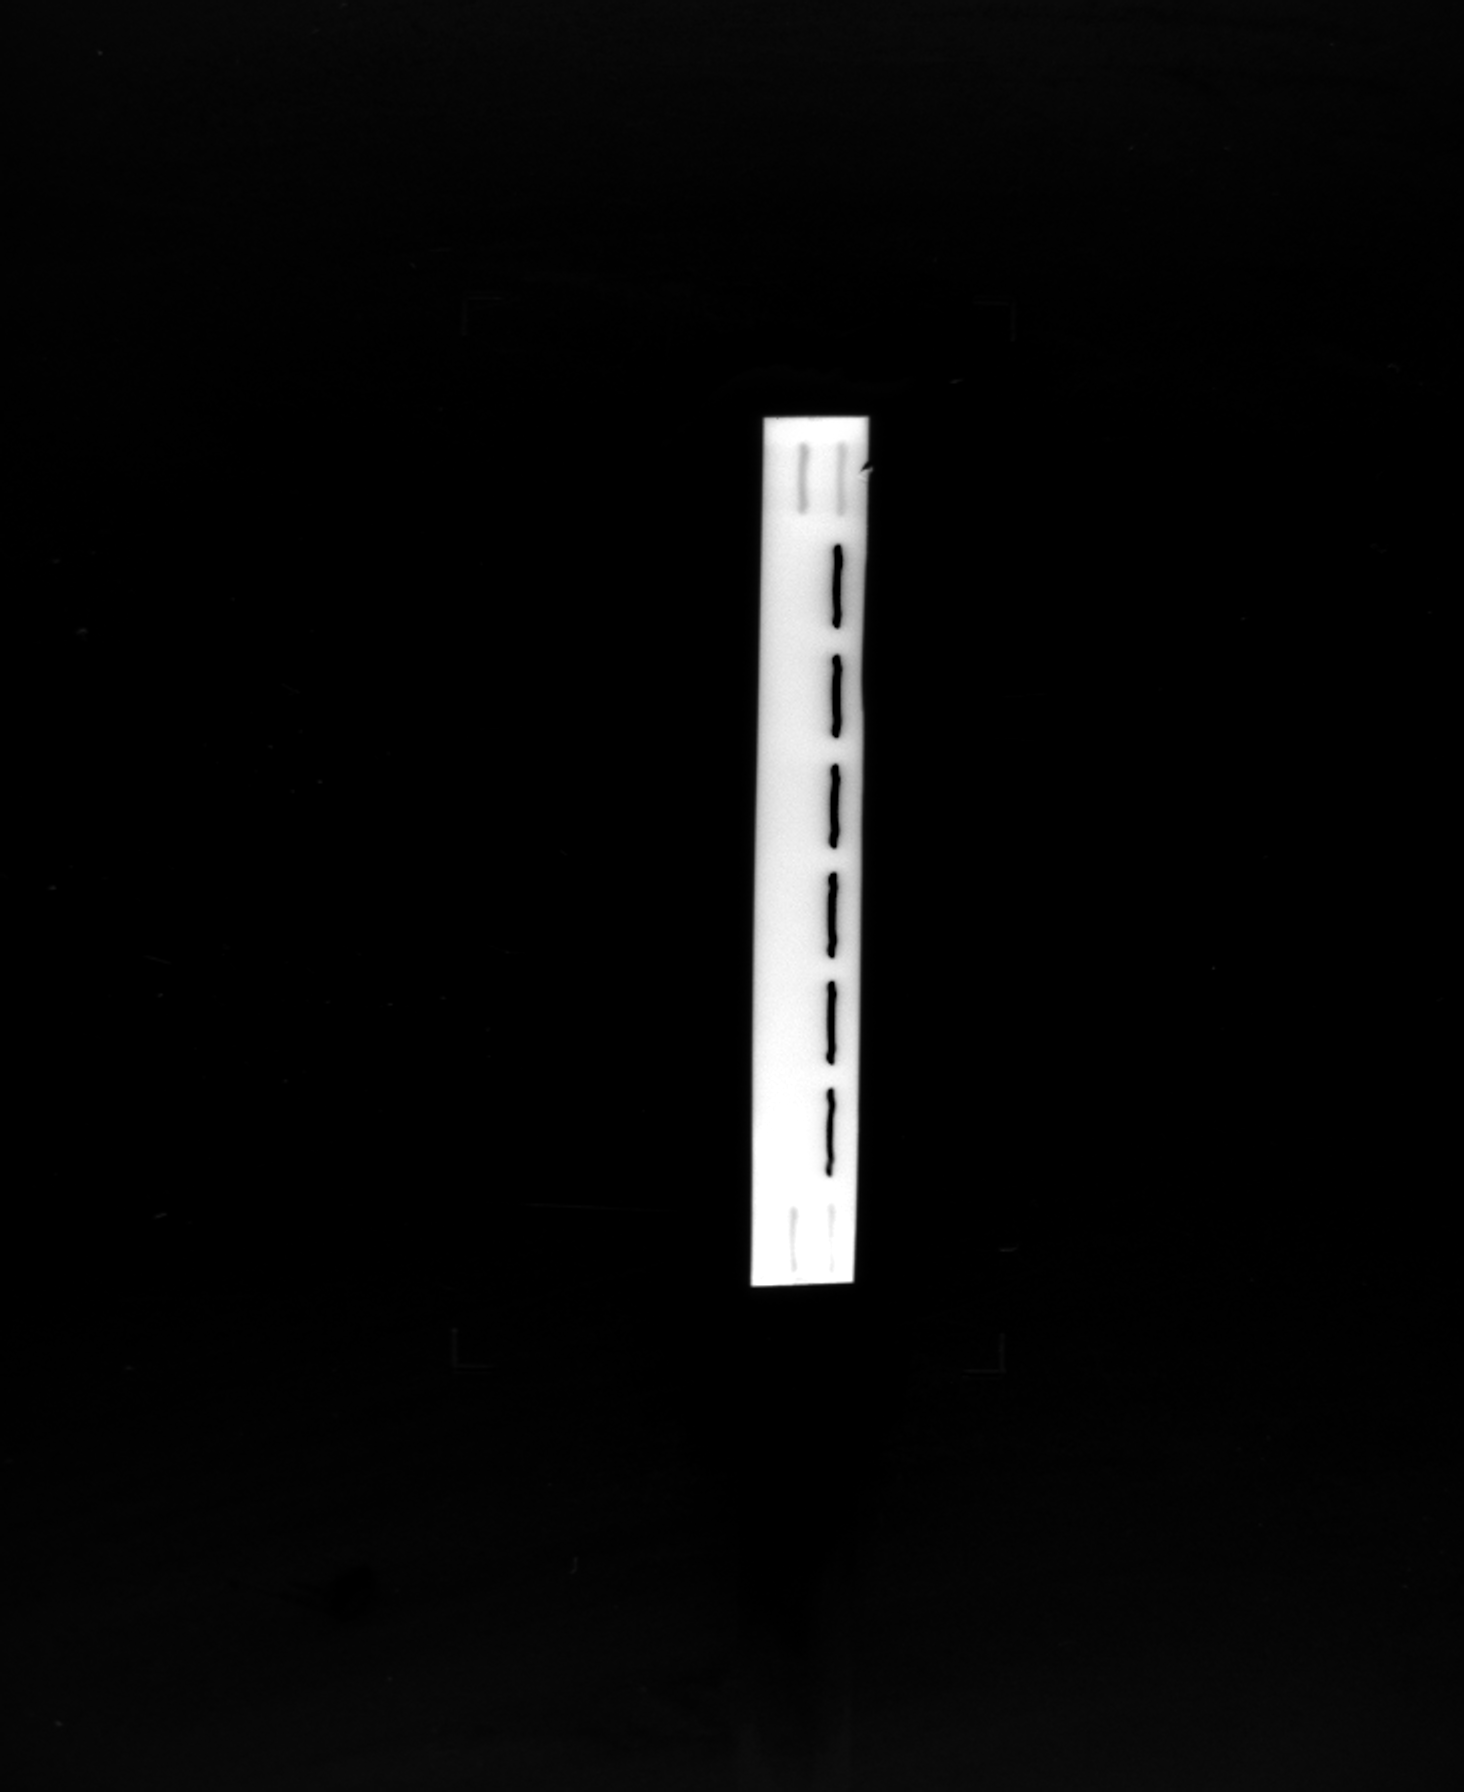

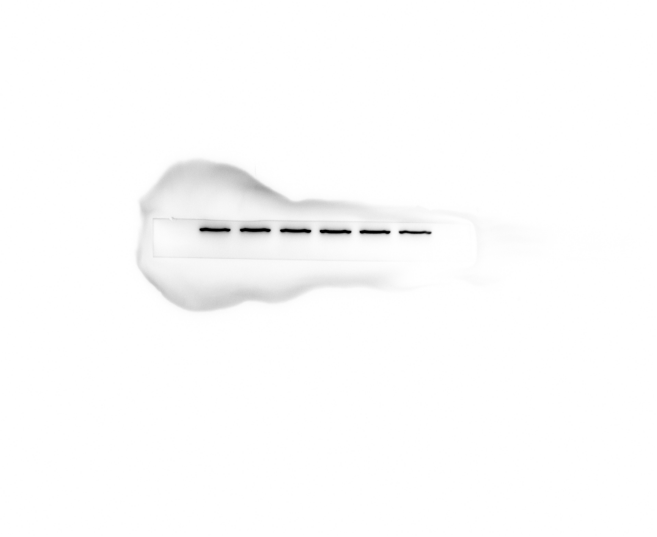


Repeat 3

YAP1


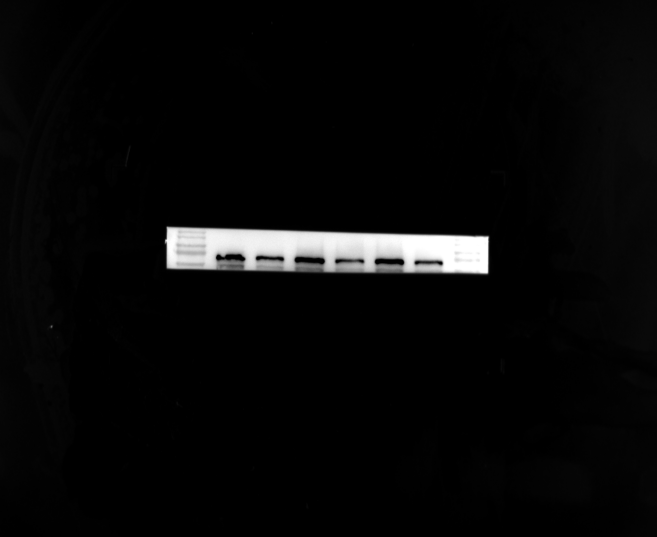

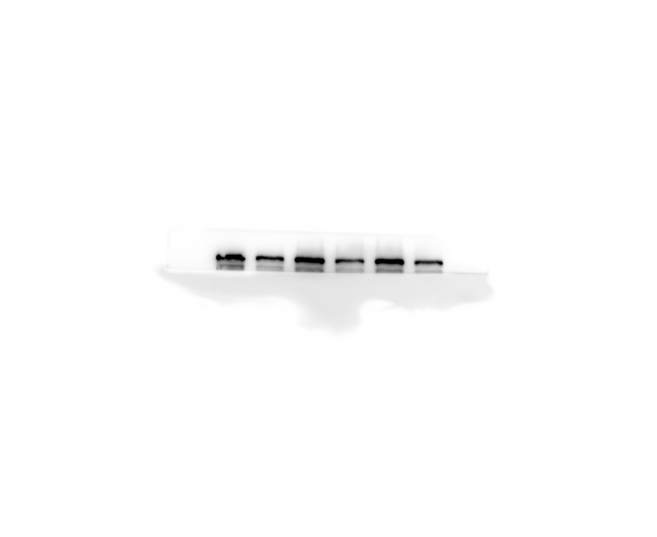


β-actin


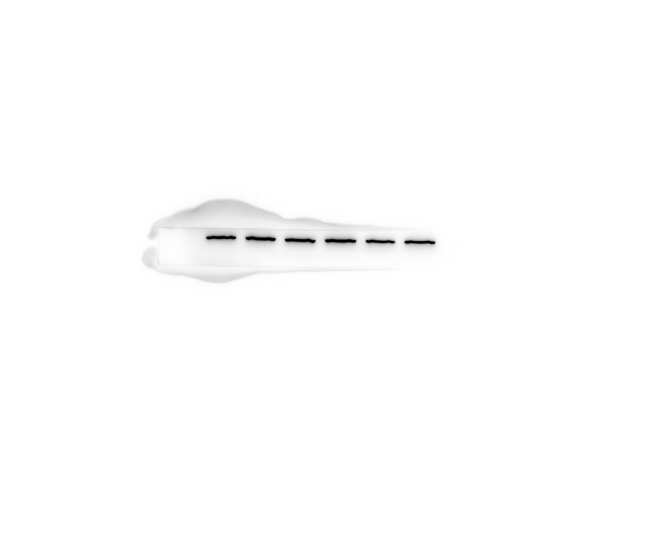

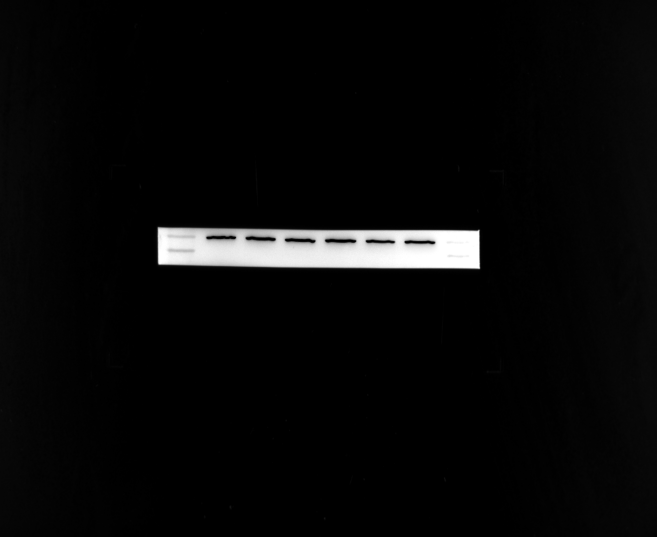

Supplement: WB.zip [file YAP1.docx]

Repeat 1


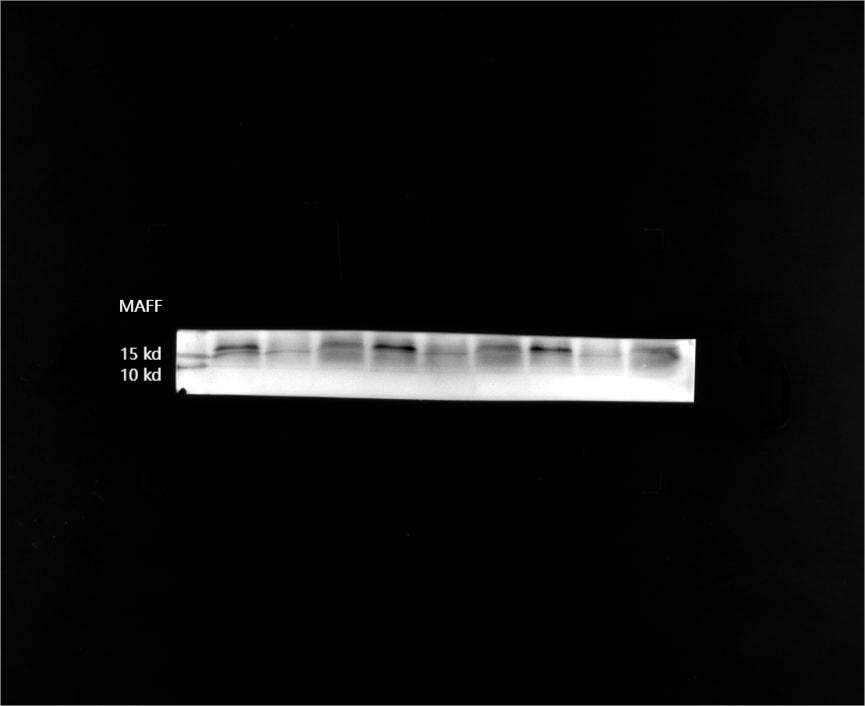


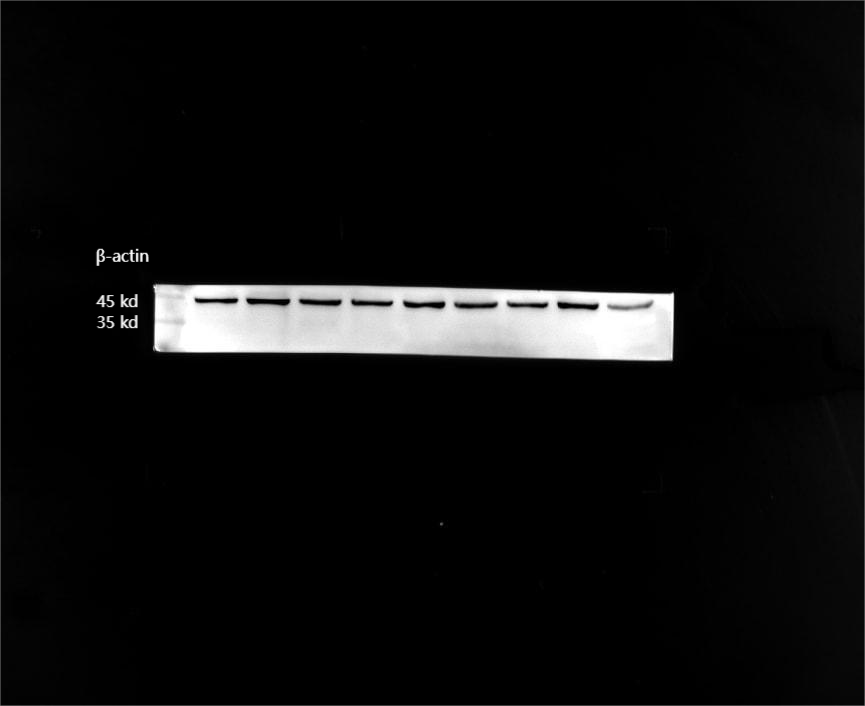


Repeat 2


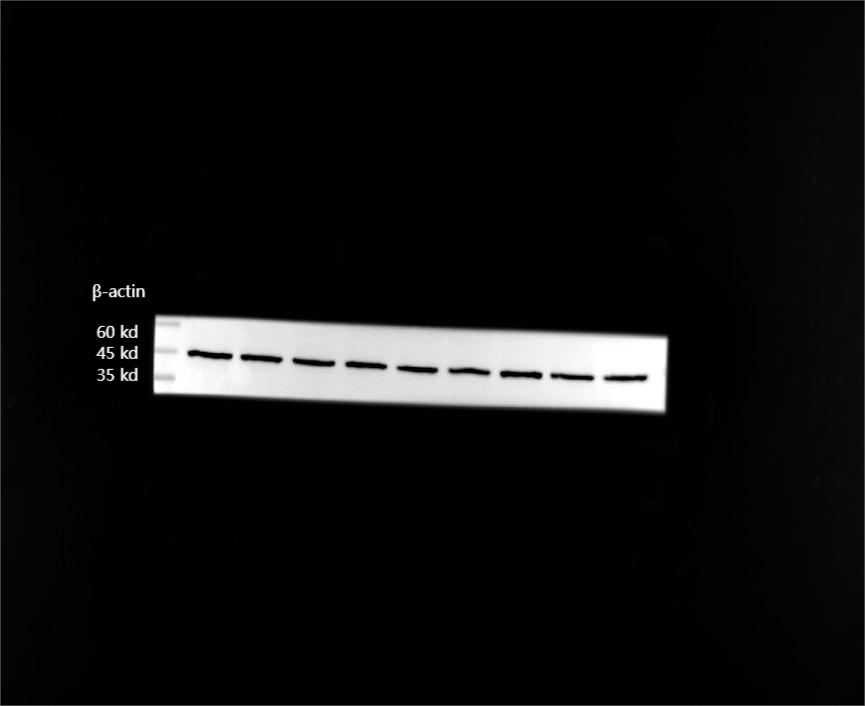


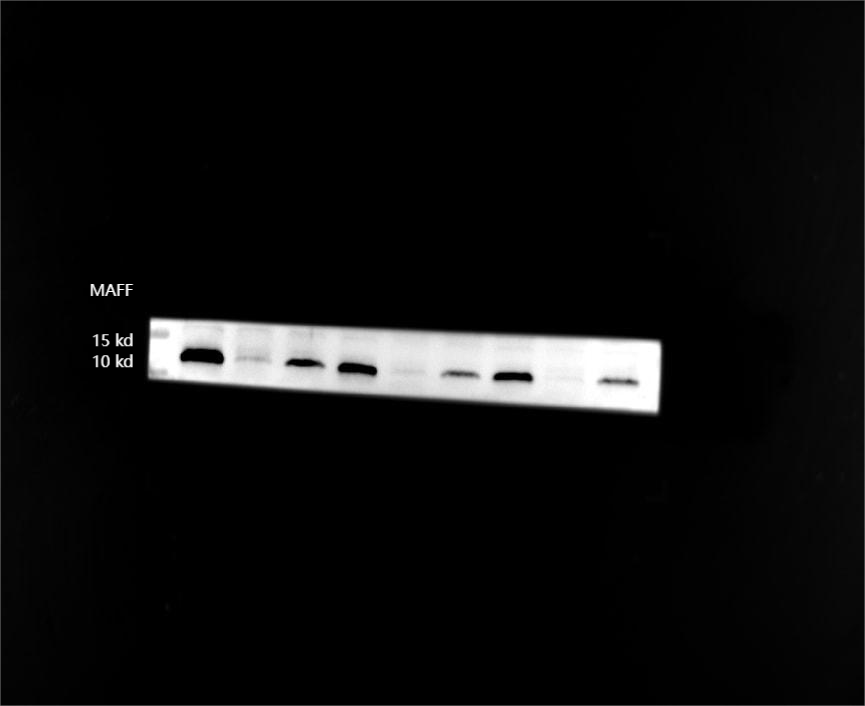


Repeat 3


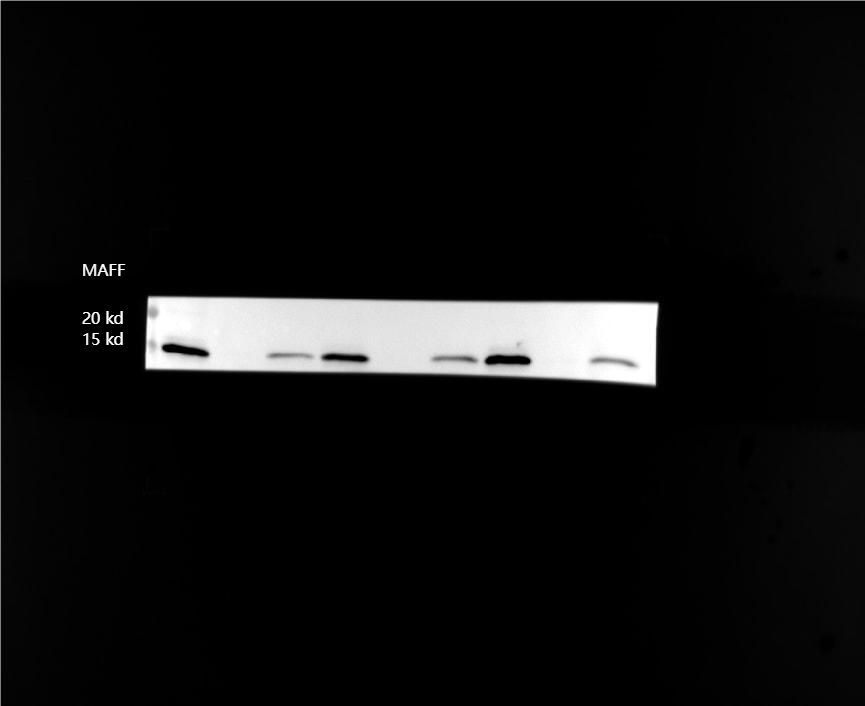


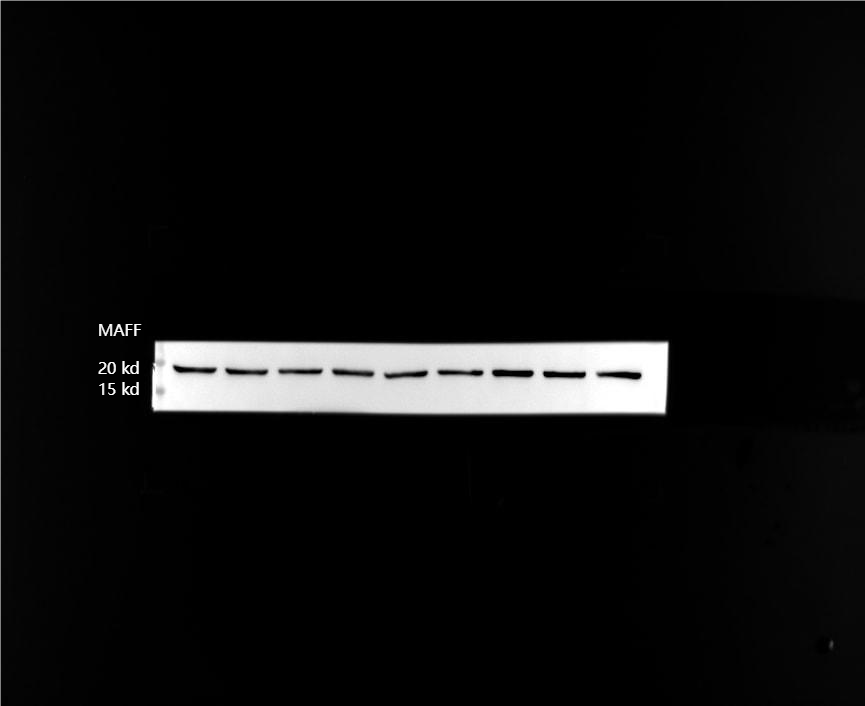

Supplement: WB.zip [file MAFF.docx]
